# Supplementary material for: Integrative transcriptomics and metabolomics explore the mechanism of kaempferol on improving nonalcoholic steatohepatitis
Source: Royal Society of Chemistry journal article supplement (doi:10.1039/d0fo02123g), 2020-01-01
Supplement: d0fo02123g2.xlsx [file d0fo02123g2.xlsx]

## Sheet: C vs M
		log2 (Ratio)	Adjusted P-value (Differentially expressed)	Annotation
	ID	model/control	model/control	Gene_symbol	Description
C VS M	ENSMUSG00000002944	0.611137	0.04565	Cd36	CD36 antigen
	ENSMUSG00000004462	1.02627	0.00695	Tbccd1	TBCC domain containing 1
	ENSMUSG00000005547	0.648853	0.04295	Cyp2a5	cytochrome P450, family 2, subfamily a, polypeptide 5
	ENSMUSG00000009092	4.75836	0.00275	Derl3	Der1-like domain family, member 3
	ENSMUSG00000009687	1.04158	0.0424	Fxyd5	FXYD domain-containing ion transport regulator 5
	ENSMUSG00000012187	2.0378	0.00205	Mogat1	monoacylglycerol O-acyltransferase 1
	ENSMUSG00000012428	1.11598	0.001	Steap4	STEAP family member 4
	ENSMUSG00000017677	1.18912	0.00305	Wsb1	WD repeat and SOCS box-containing 1
	ENSMUSG00000019189	1.28801	0.0278	Rnf145	ring finger protein 145
	ENSMUSG00000019843	1.06994	0.0284	Fyn	Fyn proto-oncogene
	ENSMUSG00000019906	0.817891	0.0217	Lin7a	lin-7 homolog A (C. elegans)
	ENSMUSG00000019944	1.25012	0.0235	Rhobtb1	Rho-related BTB domain containing 1
	ENSMUSG00000019947	0.920619	0.00275	Arid5b	AT rich interactive domain 5B (MRF1-like)
	ENSMUSG00000020027	1.43561	0.0017	Socs2	suppressor of cytokine signaling 2
	ENSMUSG00000020048	1.43113	0.00045	Hsp90b1	heat shock protein 90, beta (Grp94), member 1
	ENSMUSG00000020205	1.48311	5e-05	Phlda1	pleckstrin homology like domain, family A, member 1
	ENSMUSG00000020538	0.983761	0.0438	Srebf1	sterol regulatory element binding transcription factor 1
	ENSMUSG00000020571	1.3444	5e-05	Pdia6	protein disulfide isomerase associated 6
	ENSMUSG00000020593	2.4598	5e-05	Lpin1	lipin 1
	ENSMUSG00000020873	1.44164	0.00125	Slc35b1	solute carrier family 35, member B1
	ENSMUSG00000020893	0.843118	0.0177	Per1	period circadian clock 1
	ENSMUSG00000020964	1.39671	0.00365	Sel1l	sel-1 suppressor of lin-12-like (C. elegans)
	ENSMUSG00000021108	1.08228	0.00315	Prkch	protein kinase C, eta
	ENSMUSG00000021453	2.22662	5e-05	Gadd45g	growth arrest and DNA-damage-inducible 45 gamma
	ENSMUSG00000021510	0.88073	0.0172	A530054K11Rik
	ENSMUSG00000022003	1.11629	0.00055	Slc25a30	solute carrier family 25, member 30
	ENSMUSG00000022136	0.65992	0.03465	Dnajc3	DnaJ heat shock protein family (Hsp40) member C3
	ENSMUSG00000022353	0.984464	0.0024	Mtss1	metastasis suppressor 1
	ENSMUSG00000022498	1.13396	0.0199	Txndc11	thioredoxin domain containing 11
	ENSMUSG00000022707	0.808267	0.01795	Gbe1	glucan (1,4-alpha-), branching enzyme 1
	ENSMUSG00000022769	2.32529	5e-05	Sdf2l1	stromal cell-derived factor 2-like 1
	ENSMUSG00000022951	0.932275	0.02415	Rcan1	regulator of calcineurin 1
	ENSMUSG00000023073	1.75679	0.0001	Slc10a2	solute carrier family 10, member 2
	ENSMUSG00000023087	0.927272	0.00865	Ccrn4l
	ENSMUSG00000023272	2.99402	5e-05	Creld2	cysteine-rich with EGF-like domains 2
	ENSMUSG00000023892	1.1243	0.0145	Zfp51	zinc finger protein 51
	ENSMUSG00000023963	0.867739	0.01275	Cyp39a1	cytochrome P450, family 39, subfamily a, polypeptide 1
	ENSMUSG00000024222	1.09144	0.042	Fkbp5	FK506 binding protein 5
	ENSMUSG00000024561	1.62794	5e-05	Mbd1	methyl-CpG binding domain protein 1
	ENSMUSG00000024694	1.53188	0.0009	Keg1	kidney expressed gene 1
	ENSMUSG00000024807	1.9554	0.00115	Syvn1	synovial apoptosis inhibitor 1, synoviolin
	ENSMUSG00000024924	3.12343	0.00075	Vldlr	very low density lipoprotein receptor
	ENSMUSG00000025173	1.30164	0.0207	Wdr45b	WD repeat domain 45B
	ENSMUSG00000025396	0.889069	0.0213	Hsd17b6	hydroxysteroid (17-beta) dehydrogenase 6
	ENSMUSG00000025742	1.75558	0.01245	Prps2	phosphoribosyl pyrophosphate synthetase 2
	ENSMUSG00000025823	1.14876	0.0007	Pdia4	protein disulfide isomerase associated 4
	ENSMUSG00000025981	0.640691	0.04605	Coq10b	coenzyme Q10B
	ENSMUSG00000026072	1.20823	0.00895	Il1r1	interleukin 1 receptor, type I
	ENSMUSG00000026475	2.0312	5e-05	Rgs16	regulator of G-protein signaling 16
	ENSMUSG00000026688	1.25702	0.0077	Mgst3	microsomal glutathione S-transferase 3
	ENSMUSG00000026773	1.70865	5e-05	Pfkfb3	6-phosphofructo-2-kinase/fructose-2,6-biphosphatase 3
	ENSMUSG00000026825	2.03861	0.0375	Dnm1	dynamin 1
	ENSMUSG00000026839	1.20252	0.00625	Upp2	uridine phosphorylase 2
	ENSMUSG00000026864	1.35672	0.0002	Hspa5	heat shock protein 5
	ENSMUSG00000027016	1.63303	0.0007	Zfp385b	zinc finger protein 385B
	ENSMUSG00000027035	1.10798	0.01785	Cers6	ceramide synthase 6
	ENSMUSG00000027248	0.927703	0.0287	Pdia3	protein disulfide isomerase associated 3
	ENSMUSG00000027514	1.44393	0.0054	Zbp1	Z-DNA binding protein 1
	ENSMUSG00000027559	1.108	0.0036	Car3	carbonic anhydrase 3
	ENSMUSG00000027822	0.722833	0.0362	Slc33a1	solute carrier family 33 (acetyl-CoA transporter), member 1
	ENSMUSG00000027953	1.38042	0.00585	Slc50a1	solute carrier family 50 (sugar transporter), member 1
	ENSMUSG00000028240	0.98373	0.00185	Cyp7a1	cytochrome P450, family 7, subfamily a, polypeptide 1
	ENSMUSG00000028381	1.46433	0.0165	Ugcg	UDP-glucose ceramide glucosyltransferase
	ENSMUSG00000028655	0.782229	0.0287	Mfsd2a	major facilitator superfamily domain containing 2A
	ENSMUSG00000028978	0.949672	0.0138	Nos3	nitric oxide synthase 3, endothelial cell
	ENSMUSG00000029380	1.85464	0.00305	Cxcl1	chemokine (C-X-C motif) ligand 1
	ENSMUSG00000029482	2.04533	5e-05	Aacs	acetoacetyl-CoA synthetase
	ENSMUSG00000029591	1.03713	0.0384	Ung	uracil DNA glycosylase
	ENSMUSG00000029833	1.24688	0.00465	Trim24	tripartite motif-containing 24
	ENSMUSG00000030022	1.31889	0.0264	Adamts9	a disintegrin-like and metallopeptidase (reprolysin type) with thrombospondin type 1 motif, 9
	ENSMUSG00000030107	0.916746	0.03475	Usp18	ubiquitin specific peptidase 18
	ENSMUSG00000030762	0.969919	0.0084	Aqp8	aquaporin 8
	ENSMUSG00000031271	1.56125	0.00055	Serpina7	serine (or cysteine) peptidase inhibitor, clade A (alpha-1 antiproteinase, antitrypsin), member 7
	ENSMUSG00000031381	1.97657	0.00175	Piga	phosphatidylinositol glycan anchor biosynthesis, class A
	ENSMUSG00000031613	0.605786	0.04555	Hpgd	hydroxyprostaglandin dehydrogenase 15 (NAD)
	ENSMUSG00000032115	1.69386	5e-05	Hyou1	hypoxia up-regulated 1
	ENSMUSG00000032231	1.08719	0.022	Anxa2	annexin A2
	ENSMUSG00000032311	1.02602	0.031	Nrg4	neuregulin 4
	ENSMUSG00000032353	0.923568	0.0468	Tmed3	transmembrane emp24 domain containing 3
	ENSMUSG00000032575	2.16896	0.0101	Manf	mesencephalic astrocyte-derived neurotrophic factor
	ENSMUSG00000032578	1.33237	0.0099	Cish	cytokine inducible SH2-containing protein
	ENSMUSG00000032741	0.766096	0.03205	Tpcn1	two pore channel 1
	ENSMUSG00000032786	1.05871	0.0205	Alas1	aminolevulinic acid synthase 1
	ENSMUSG00000034459	1.7349	0.0003	Ifit1	interferon-induced protein with tetratricopeptide repeats 1
	ENSMUSG00000035133	0.768057	0.03375	Arhgap5	Rho GTPase activating protein 5
	ENSMUSG00000035202	1.71155	0.00015	Lars2	leucyl-tRNA synthetase, mitochondrial
	ENSMUSG00000035451	0.841747	0.0099	Foxa1	forkhead box A1
	ENSMUSG00000035686	2.95766	5e-05	Thrsp	thyroid hormone responsive
	ENSMUSG00000035692	1.80129	0.00635	Isg15	ISG15 ubiquitin-like modifier
	ENSMUSG00000035828	0.630931	0.0485	Pim3	proviral integration site 3
	ENSMUSG00000035868	1.25093	0.01825	3110052M02Rik
	ENSMUSG00000035958	1.32054	0.01845	Tdp2	tyrosyl-DNA phosphodiesterase 2
	ENSMUSG00000036390	1.94437	0.0117	Gadd45a	growth arrest and DNA-damage-inducible 45 alpha
	ENSMUSG00000036885	1.19393	0.00345	Arhgef26	Rho guanine nucleotide exchange factor (GEF) 26
	ENSMUSG00000036904	0.786627	0.02165	Fzd8	frizzled class receptor 8
	ENSMUSG00000037025	1.20693	0.0057	Foxa2	forkhead box A2
	ENSMUSG00000037470	0.775666	0.0448	Uggt1	UDP-glucose glycoprotein glucosyltransferase 1
	ENSMUSG00000037606	1.61363	0.0136	Osbpl5	oxysterol binding protein-like 5
	ENSMUSG00000038508	1.22714	0.01835	Gdf15	growth differentiation factor 15
	ENSMUSG00000038550	2.45171	0.00435	Gm129
	ENSMUSG00000040017	1.09826	0.00035	Saa4	serum amyloid A 4
	ENSMUSG00000040170	0.917595	0.0322	Fmo2	flavin containing monooxygenase 2
	ENSMUSG00000040253	1.40902	0.00055	Gbp7	guanylate binding protein 7
	ENSMUSG00000040459	0.790559	0.04155	Arglu1	arginine and glutamate rich 1
	ENSMUSG00000040659	0.679987	0.0496	Efhd2	EF hand domain containing 2
	ENSMUSG00000040660	7.16224	5e-05	Cyp2b9	cytochrome P450, family 2, subfamily b, polypeptide 9
	ENSMUSG00000041237	1.17498	0.0151	Pklr	pyruvate kinase liver and red blood cell
	ENSMUSG00000041417	0.808884	0.0092	Pik3r1	phosphatidylinositol 3-kinase, regulatory subunit, polypeptide 1 (p85 alpha)
	ENSMUSG00000041471	0.886051	0.00305	Fam35a	family with sequence similarity 35, member A
	ENSMUSG00000043013	2.09575	0.0017	Onecut1	one cut domain, family member 1
	ENSMUSG00000044167	0.723452	0.01625	Foxo1	forkhead box O1
	ENSMUSG00000044501	2.2011	5e-05	Zfp758	zinc finger protein 758
	ENSMUSG00000044937	0.917155	0.0299	BC030307
	ENSMUSG00000046179	1.27774	0.0113	E2f8	E2F transcription factor 8
	ENSMUSG00000047554	1.21109	0.0171	Tmem41b	transmembrane protein 41B
	ENSMUSG00000047735	1.44692	0.0001	Samd9l	sterile alpha motif domain containing 9-like
	ENSMUSG00000048280	0.916217	0.00605	Zfp738	zinc finger protein 738
	ENSMUSG00000049580	1.0462	0.0031	Tsku	tsukushi, small leucine rich proteoglycan
	ENSMUSG00000051579	1.8973	0.00375	Tceal8	transcription elongation factor A (SII)-like 8
	ENSMUSG00000052117	1.26343	0.0019	D630039A03Rik	RIKEN cDNA D630039A03 gene
	ENSMUSG00000052435	1.51042	0.00085	Cebpe	CCAAT/enhancer binding protein (C/EBP), epsilon
	ENSMUSG00000052748	1.24171	0.02505	Swt1	SWT1 RNA endoribonuclease homolog (S. cerevisiae)
	ENSMUSG00000053846	0.98259	0.001	Lipg	lipase, endothelial
	ENSMUSG00000054072	0.769875	0.01555	Iigp1	interferon inducible GTPase 1
	ENSMUSG00000054263	1.12365	0.0161	Lifr	leukemia inhibitory factor receptor
	ENSMUSG00000054588	2.44599	5e-05	Gbp10	guanylate-binding protein 10
	ENSMUSG00000055148	0.926053	0.01755	Klf2	Kruppel-like factor 2 (lung)
	ENSMUSG00000055866	1.0395	0.0021	Per2	period circadian clock 2
	ENSMUSG00000056260	1.23012	0.00795	Lrif1	ligand dependent nuclear receptor interacting factor 1
	ENSMUSG00000056313	1.59278	5e-05	1810011O10Rik	RIKEN cDNA 1810011O10 gene
	ENSMUSG00000056978	1.93782	0.0002	Hamp2	hepcidin antimicrobial peptide 2
	ENSMUSG00000057069	1.33167	5e-05	Ero1lb	ERO1-like beta (S. cerevisiae)
	ENSMUSG00000057346	0.871585	0.0176	Apol9a	apolipoprotein L 9a
	ENSMUSG00000058152	0.808558	0.02685	Chsy3	chondroitin sulfate synthase 3
	ENSMUSG00000058748	1.63387	0.001	Zfp958	zinc finger protein 958
	ENSMUSG00000060613	1.2138	0.0055	Cyp2c70	cytochrome P450, family 2, subfamily c, polypeptide 70
	ENSMUSG00000060807	1.0173	0.00095	Serpina6	serine (or cysteine) peptidase inhibitor, clade A, member 6
	ENSMUSG00000061947	0.643249	0.03805	Serpina10	serine (or cysteine) peptidase inhibitor, clade A (alpha-1 antiproteinase, antitrypsin), member 10
	ENSMUSG00000064354	1.38515	0.0095	mt-Co2
	ENSMUSG00000066687	0.72503	0.0248	Zbtb16	zinc finger and BTB domain containing 16
	ENSMUSG00000068220	1.73331	0.00015	Lgals1	lectin, galactose binding, soluble 1
	ENSMUSG00000069267	3.12276	0.02785	Hist1h3b	histone cluster 1, H3b
	ENSMUSG00000070436	1.00399	0.00815	Serpinh1	serine (or cysteine) peptidase inhibitor, clade H, member 1
	ENSMUSG00000070661	1.3078	0.0027	Rnf186	ring finger protein 186
	ENSMUSG00000071267	1.12876	0.03595	Zfp942	zinc finger protein 942
	ENSMUSG00000073565	1.19694	0.00735	Prr16	proline rich 16
	ENSMUSG00000074170	0.840242	0.03285	Plekhf1	pleckstrin homology domain containing, family F (with FYVE domain) member 1
	ENSMUSG00000074622	1.11016	0.0006	Mafb	v-maf musculoaponeurotic fibrosarcoma oncogene family, protein B (avian)
	ENSMUSG00000074829	0.864355	0.0394	2010315B03Rik	RIKEN cDNA 2010315B03 gene
	ENSMUSG00000074882	1.06632	0.0019	Cyp2c68	cytochrome P450, family 2, subfamily c, polypeptide 68
	ENSMUSG00000074896	1.6711	0.00075	Ifit3	interferon-induced protein with tetratricopeptide repeats 3
	ENSMUSG00000078234	1.0049	0.002	Klhdc7a	kelch domain containing 7A
	ENSMUSG00000078866	1.70317	5e-05	Gm14420
	ENSMUSG00000079083	1.34111	0.00525	Jrkl	Jrk-like
	ENSMUSG00000079555	0.917052	0.0247	Haus3	HAUS augmin-like complex, subunit 3
	ENSMUSG00000090306	1.12878	0.0008	Adh6-ps1	alcohol dehydrogenase 6 (class V), pseudogene 1
	ENSMUSG00000091867	2.65806	5e-05	Cyp2a22	cytochrome P450, family 2, subfamily a, polypeptide 22
	ENSMUSG00000096768	6.05074	0.02745	Erdr1	erythroid differentiation regulator 1
	ENSMUSG00000098678	0.776937	0.0489	Mroh6	maestro heat-like repeat family member 6
	ENSMUSG00000000142	-0.954838	0.0194	Axin2	axin 2
	ENSMUSG00000000171	-1.10123	0.00085	Sdhd	succinate dehydrogenase complex, subunit D, integral membrane protein
	ENSMUSG00000000278	-1.18027	0.0011	Scpep1	serine carboxypeptidase 1
	ENSMUSG00000000399	-1.12381	0.0029	Ndufa9	NADH dehydrogenase (ubiquinone) 1 alpha subcomplex, 9
	ENSMUSG00000000555	-1.17563	0.00065	Itga5	integrin alpha 5 (fibronectin receptor alpha)
	ENSMUSG00000000711	-0.906905	0.0134	Rab5b	RAB5B, member RAS oncogene family
	ENSMUSG00000001123	-0.885148	0.00855	Lgals9	lectin, galactose binding, soluble 9
	ENSMUSG00000001270	-1.40359	0.01265	Ckb	creatine kinase, brain
	ENSMUSG00000001417	-1.0825	0.02435	Rhbg	Rhesus blood group-associated B glycoprotein
	ENSMUSG00000001670	-0.935715	0.01705	Tat	tyrosine aminotransferase
	ENSMUSG00000001768	-1.30264	0.0354	Rin2	Ras and Rab interactor 2
	ENSMUSG00000001794	-0.903716	0.01895	Capns1	calpain, small subunit 1
	ENSMUSG00000002052	-0.691878	0.03605	Supt6	suppressor of Ty 6
	ENSMUSG00000002059	-1.79559	0.00435	Rab34	RAB34, member RAS oncogene family
	ENSMUSG00000002102	-0.627791	0.04875	Psmc3	proteasome (prosome, macropain) 26S subunit, ATPase 3
	ENSMUSG00000002129	-0.766042	0.04635	Sf3a1	splicing factor 3a, subunit 1
	ENSMUSG00000002265	-2.07215	5e-05	Peg3	paternally expressed 3
	ENSMUSG00000002289	-0.988242	0.0032	Angptl4	angiopoietin-like 4
	ENSMUSG00000002332	-0.819645	0.0107	Dhrs1	dehydrogenase/reductase (SDR family) member 1
	ENSMUSG00000002524	-0.792451	0.0193	Puf60	poly-U binding splicing factor 60
	ENSMUSG00000002804	-1.31114	0.0362	Nudt14	nudix (nucleoside diphosphate linked moiety X)-type motif 14
	ENSMUSG00000002957	-0.685284	0.02585	Ap2a2	adaptor-related protein complex 2, alpha 2 subunit
	ENSMUSG00000003429	-1.17274	0.00065	Rps11	ribosomal protein S11
	ENSMUSG00000003464	-0.857526	0.0462	Pex19	peroxisomal biogenesis factor 19
	ENSMUSG00000003623	-1.06274	0.0015	Crot	carnitine O-octanoyltransferase
	ENSMUSG00000003721	-1.3935	0.0025	Insig2	insulin induced gene 2
	ENSMUSG00000004035	-1.11601	0.0235	Gstm7	glutathione S-transferase, mu 7
	ENSMUSG00000004562	-0.774728	0.04195	Arhgef40	Rho guanine nucleotide exchange factor (GEF) 40
	ENSMUSG00000004610	-0.661348	0.04035	Etfb	electron transferring flavoprotein, beta polypeptide
	ENSMUSG00000004655	-0.653835	0.0411	Aqp1	aquaporin 1
	ENSMUSG00000004789	-0.910852	0.0209	Dlst	dihydrolipoamide S-succinyltransferase (E2 component of 2-oxo-glutarate complex)
	ENSMUSG00000005198	-0.777617	0.01685	Polr2a	polymerase (RNA) II (DNA directed) polypeptide A
	ENSMUSG00000005225	-1.02831	0.04445	Plekha8	pleckstrin homology domain containing, family A (phosphoinositide binding specific) member 8
	ENSMUSG00000005469	-0.898699	0.01815	Prkaca	protein kinase, cAMP dependent, catalytic, alpha
	ENSMUSG00000005683	-0.686704	0.0339	Cs	citrate synthase
	ENSMUSG00000005779	-0.947388	0.0075	Psmb4	proteasome (prosome, macropain) subunit, beta type 4
	ENSMUSG00000006299	-0.972804	0.0029	Aamp	angio-associated migratory protein
	ENSMUSG00000006304	-0.719468	0.0314	Arpc2	actin related protein 2/3 complex, subunit 2
	ENSMUSG00000006315	-1.18513	0.04655	Tmem147	transmembrane protein 147
	ENSMUSG00000006418	-1.07454	0.0159	Rnf114	ring finger protein 114
	ENSMUSG00000006522	-1.12158	0.00395	Itih3	inter-alpha trypsin inhibitor, heavy chain 3
	ENSMUSG00000006527	-0.930771	0.01865	Sfmbt1	Scm-like with four mbt domains 1
	ENSMUSG00000006529	-0.905007	0.00555	Itih1	inter-alpha trypsin inhibitor, heavy chain 1
	ENSMUSG00000006736	-1.35763	0.00145	Tspan31	tetraspanin 31
	ENSMUSG00000006998	-0.745039	0.02475	Psmd2	proteasome (prosome, macropain) 26S subunit, non-ATPase, 2
	ENSMUSG00000007458	-0.853151	0.01755	M6pr	mannose-6-phosphate receptor, cation dependent
	ENSMUSG00000007815	-0.657436	0.03315	Rhoa	ras homolog family member A
	ENSMUSG00000008668	-0.991485	0.0344	Rps18	ribosomal protein S18
	ENSMUSG00000008855	-0.965842	0.00455	Hdac5	histone deacetylase 5
	ENSMUSG00000008892	-0.899058	0.0211	Vdac3	voltage-dependent anion channel 3
	ENSMUSG00000009112	-0.976746	0.01365	Bcl2l13	BCL2-like 13 (apoptosis facilitator)
	ENSMUSG00000010047	-0.734661	0.02505	Hyal2	hyaluronoglucosaminidase 2
	ENSMUSG00000010376	-1.50612	0.00745	Nedd8	neural precursor cell expressed, developmentally down-regulated gene 8
	ENSMUSG00000010651	-0.894343	0.0191	Acaa1b	acetyl-Coenzyme A acyltransferase 1B
	ENSMUSG00000011148	-0.863155	0.03125	Adssl1	adenylosuccinate synthetase like 1
	ENSMUSG00000011831	-0.857768	0.0473	Evi5	ecotropic viral integration site 5
	ENSMUSG00000012848	-0.855685	0.01715	Rps5	ribosomal protein S5
	ENSMUSG00000013593	-0.747824	0.02395	Ndufs2	NADH dehydrogenase (ubiquinone) Fe-S protein 2
	ENSMUSG00000014349	-0.749448	0.04605	Ube2z	ubiquitin-conjugating enzyme E2Z
	ENSMUSG00000014542	-0.96197	0.0286	Clec4f	C-type lectin domain family 4, member f
	ENSMUSG00000014769	-0.933378	0.00485	Psmb1	proteasome (prosome, macropain) subunit, beta type 1
	ENSMUSG00000015165	-0.857133	0.02715	Hnrnpl	heterogeneous nuclear ribonucleoprotein L
	ENSMUSG00000015224	-0.957395	0.0043	Cyp2j9	cytochrome P450, family 2, subfamily j, polypeptide 9
	ENSMUSG00000015312	-2.82618	0.00395	Gadd45b	growth arrest and DNA-damage-inducible 45 beta
	ENSMUSG00000015357	-1.31471	0.0001	Clpx	caseinolytic mitochondrial matrix peptidase chaperone subunit
	ENSMUSG00000015755	-1.05232	0.0073	Tab2	TGF-beta activated kinase 1/MAP3K7 binding protein 2
	ENSMUSG00000015806	-0.782308	0.0342	Qdpr	quinoid dihydropteridine reductase
	ENSMUSG00000015890	-1.12467	0.0006	Amdhd1	amidohydrolase domain containing 1
	ENSMUSG00000015966	-1.59625	0.00015	Il17rb	interleukin 17 receptor B
	ENSMUSG00000016256	-0.970607	0.0136	Ctsz	cathepsin Z
	ENSMUSG00000016427	-0.760124	0.0292	Ndufa1	NADH dehydrogenase (ubiquinone) 1 alpha subcomplex, 1
	ENSMUSG00000016528	-1.3765	0.0002	Mapkapk2	MAP kinase-activated protein kinase 2
	ENSMUSG00000016541	-1.58316	5e-05	Atxn10	ataxin 10
	ENSMUSG00000016942	-0.612971	0.04915	Tmprss6	transmembrane serine protease 6
	ENSMUSG00000018102	-0.682506	0.0338	Hist1h2bc	histone cluster 1, H2bc
	ENSMUSG00000018166	-0.974366	0.002	Erbb3	erb-b2 receptor tyrosine kinase 3
	ENSMUSG00000018286	-0.667792	0.03995	Psmb6	proteasome (prosome, macropain) subunit, beta type 6
	ENSMUSG00000018339	-1.85171	0.0224	Gpx3	glutathione peroxidase 3
	ENSMUSG00000018340	-0.705988	0.0218	Anxa6	annexin A6
	ENSMUSG00000018405	-1.66805	0.02785	Mrm1	mitochondrial rRNA methyltransferase 1
	ENSMUSG00000018537	-1.09967	0.0049	Pcgf2	polycomb group ring finger 2
	ENSMUSG00000018572	-0.727629	0.0434	Phf23	PHD finger protein 23
	ENSMUSG00000018574	-0.906208	0.00455	Acadvl	acyl-Coenzyme A dehydrogenase, very long chain
	ENSMUSG00000018659	-1.13117	0.01425	Pnpo	pyridoxine 5'-phosphate oxidase
	ENSMUSG00000018677	-1.13373	0.0008	Slc25a39	solute carrier family 25, member 39
	ENSMUSG00000018750	-1.1038	0.01535	Zbtb4	zinc finger and BTB domain containing 4
	ENSMUSG00000018761	-1.05625	0.013	Mpdu1	mannose-P-dolichol utilization defect 1
	ENSMUSG00000018858	-1.03807	0.0476	Ict1	immature colon carcinoma transcript 1
	ENSMUSG00000019082	-1.35226	0.0006	Slc25a22	solute carrier family 25 (mitochondrial carrier, glutamate), member 22
	ENSMUSG00000019139	-1.16849	0.0082	Isyna1	myo-inositol 1-phosphate synthase A1
	ENSMUSG00000019179	-0.697851	0.0276	Mdh2	malate dehydrogenase 2, NAD (mitochondrial)
	ENSMUSG00000019210	-0.826201	0.02305	Atp6v1e1	ATPase, H+ transporting, lysosomal V1 subunit E1
	ENSMUSG00000019232	-2.08831	5e-05	Etnppl	ethanolamine phosphate phospholyase
	ENSMUSG00000019769	-0.645125	0.04755	Syne1	spectrin repeat containing, nuclear envelope 1
	ENSMUSG00000019849	-0.953294	0.01085	Prep	prolyl endopeptidase
	ENSMUSG00000019851	-0.775038	0.02905	Perp	PERP, TP53 apoptosis effector
	ENSMUSG00000019854	-1.29342	0.00085	Reps1	RalBP1 associated Eps domain containing protein
	ENSMUSG00000019877	-0.676154	0.0295	Serinc1	serine incorporator 1
	ENSMUSG00000019970	-1.0462	0.0203	Sgk1	serum/glucocorticoid regulated kinase 1
	ENSMUSG00000019977	-0.693835	0.0455	Hbs1l	Hbs1-like (S. cerevisiae)
	ENSMUSG00000019987	-1.30168	0.0009	Arg1	arginase, liver
	ENSMUSG00000019988	-0.77438	0.0369	Nedd1	neural precursor cell expressed, developmentally down-regulated gene 1
	ENSMUSG00000019989	-1.25089	5e-05	Enpp3	ectonucleotide pyrophosphatase/phosphodiesterase 3
	ENSMUSG00000020000	-inf	0.0002	Moxd1	monooxygenase, DBH-like 1
	ENSMUSG00000020014	-1.06553	0.0402	Gm872
	ENSMUSG00000020017	-1.94841	5e-05	Hal	histidine ammonia lyase
	ENSMUSG00000020029	-0.6585	0.04495	Nudt4	nudix (nucleoside diphosphate linked moiety X)-type motif 4
	ENSMUSG00000020089	-1.2082	0.0003	Ppa1	pyrophosphatase (inorganic) 1
	ENSMUSG00000020092	-1.05684	0.0042	Pald1	phosphatase domain containing, paladin 1
	ENSMUSG00000020098	-0.842638	0.02075	Pcbd1	pterin 4 alpha carbinolamine dehydratase/dimerization cofactor of hepatocyte nuclear factor 1 alpha (TCF1) 1
	ENSMUSG00000020122	-0.973162	0.0364	Egfr	epidermal growth factor receptor
	ENSMUSG00000020186	-1.1235	0.0022	Csrp2	cysteine and glycine-rich protein 2
	ENSMUSG00000020224	-1.2919	0.01965	Llph	LLP homolog, long-term synaptic facilitation (Aplysia)
	ENSMUSG00000020257	-0.626079	0.0489	Wdr82	WD repeat domain containing 82
	ENSMUSG00000020423	-0.914741	0.02705	Btg2	B cell translocation gene 2, anti-proliferative
	ENSMUSG00000020429	-2.06607	5e-05	Igfbp1	insulin-like growth factor binding protein 1
	ENSMUSG00000020460	-0.787937	0.04705	Rps27a	ribosomal protein S27A
	ENSMUSG00000020514	-1.051	0.029	Mrpl22	mitochondrial ribosomal protein L22
	ENSMUSG00000020549	-0.969508	0.01905	Elac2	elaC ribonuclease Z 2
	ENSMUSG00000020553	-1.10053	0.00375	Pctp	phosphatidylcholine transfer protein
	ENSMUSG00000020604	-1.52135	0.0162	Arsg	arylsulfatase G
	ENSMUSG00000020620	-0.683711	0.04265	Abca8b	ATP-binding cassette, sub-family A (ABC1), member 8b
	ENSMUSG00000020653	-1.15036	0.02325	Klf11	Kruppel-like factor 11
	ENSMUSG00000020664	-0.675314	0.0367	Dld	dihydrolipoamide dehydrogenase
	ENSMUSG00000020718	-1.24955	0.03735	Polg2	polymerase (DNA directed), gamma 2, accessory subunit
	ENSMUSG00000020741	-0.750545	0.03005	Cluh	clustered mitochondria (cluA/CLU1) homolog
	ENSMUSG00000020766	-0.965805	0.0091	Galk1	galactokinase 1
	ENSMUSG00000020775	-1.33727	0.00015	Mrpl38	mitochondrial ribosomal protein L38
	ENSMUSG00000020776	-1.8317	0.00015	Fbf1	Fas (TNFRSF6) binding factor 1
	ENSMUSG00000020777	-1.17592	0.00545	Acox1	acyl-Coenzyme A oxidase 1, palmitoyl
	ENSMUSG00000020803	-1.55681	0.0152	Txndc17	thioredoxin domain containing 17
	ENSMUSG00000020821	-0.773258	0.0198	Kif1c	kinesin family member 1C
	ENSMUSG00000020829	-1.24845	0.0226	Slc46a1	solute carrier family 46, member 1
	ENSMUSG00000020841	-0.909641	0.0417	Cpd	carboxypeptidase D
	ENSMUSG00000020900	-1.58256	0.00095	Myh10	myosin, heavy polypeptide 10, non-muscle
	ENSMUSG00000020978	-0.900338	0.02305	Klhdc2	kelch domain containing 2
	ENSMUSG00000020986	-0.675632	0.03435	Sec23a	SEC23 homolog A, COPII coat complex component
	ENSMUSG00000020988	-0.737113	0.03215	L2hgdh	L-2-hydroxyglutarate dehydrogenase
	ENSMUSG00000021024	-0.821243	0.0289	Psma6	proteasome (prosome, macropain) subunit, alpha type 6
	ENSMUSG00000021091	-1.10521	0.00545	Serpina3n	serine (or cysteine) peptidase inhibitor, clade A, member 3N
	ENSMUSG00000021109	-0.879334	0.04185	Hif1a	hypoxia inducible factor 1, alpha subunit
	ENSMUSG00000021178	-0.938284	0.00525	Psmc1	protease (prosome, macropain) 26S subunit, ATPase 1
	ENSMUSG00000021215	-0.644225	0.03735	Net1	neuroepithelial cell transforming gene 1
	ENSMUSG00000021254	-0.861893	0.0243	Gpatch2l	G patch domain containing 2 like
	ENSMUSG00000021281	-1.22191	0.04445	Tnfaip2	tumor necrosis factor, alpha-induced protein 2
	ENSMUSG00000021282	-0.768309	0.0376	Eif5	eukaryotic translation initiation factor 5
	ENSMUSG00000021290	-1.27506	0.00245	2010107E04Rik	RIKEN cDNA 2010107E04 gene
	ENSMUSG00000021340	-0.63045	0.0481	Gpld1	glycosylphosphatidylinositol specific phospholipase D1
	ENSMUSG00000021364	-1.35665	0.0004	Elovl2	elongation of very long chain fatty acids (FEN1/Elo2, SUR4/Elo3, yeast)-like 2
	ENSMUSG00000021395	-0.682782	0.0397	Spin1	spindlin 1
	ENSMUSG00000021400	-0.807588	0.0173	Wrnip1	Werner helicase interacting protein 1
	ENSMUSG00000021468	-1.04705	0.0072	Sptlc1	serine palmitoyltransferase, long chain base subunit 1
	ENSMUSG00000021476	-0.804757	0.0207	Habp4	hyaluronic acid binding protein 4
	ENSMUSG00000021477	-1.34391	0.00015	Ctsl	cathepsin L
	ENSMUSG00000021486	-0.942604	0.0135	Prelid1	PRELI domain containing 1
	ENSMUSG00000021552	-1.79819	0.0038	Gkap1	G kinase anchoring protein 1
	ENSMUSG00000021576	-0.832065	0.0359	Pdcd6	programmed cell death 6
	ENSMUSG00000021591	-1.06807	0.0036	Glrx	glutaredoxin
	ENSMUSG00000021636	-1.00535	0.0191	Marveld2	MARVEL (membrane-associating) domain containing 2
	ENSMUSG00000021686	-0.626383	0.04405	Ap3b1	adaptor-related protein complex 3, beta 1 subunit
	ENSMUSG00000021701	-0.839816	0.0318	Plk2	polo-like kinase 2
	ENSMUSG00000021737	-0.725532	0.044	Psmd6	proteasome (prosome, macropain) 26S subunit, non-ATPase, 6
	ENSMUSG00000021748	-0.617539	0.04885	Pdhb	pyruvate dehydrogenase (lipoamide) beta
	ENSMUSG00000021764	-1.02884	0.0092	Ndufs4	NADH dehydrogenase (ubiquinone) Fe-S protein 4
	ENSMUSG00000021782	-1.51458	0.0135	Dlg5	discs, large homolog 5 (Drosophila)
	ENSMUSG00000021832	-0.803104	0.0167	Psmc6	proteasome (prosome, macropain) 26S subunit, ATPase, 6
	ENSMUSG00000021871	-1.27977	0.00195	Pnp	purine-nucleoside phosphorylase
	ENSMUSG00000021918	-0.713226	0.04565	Nek4	NIMA (never in mitosis gene a)-related expressed kinase 4
	ENSMUSG00000021947	-1.7392	0.002	Cryl1	crystallin, lambda 1
	ENSMUSG00000021973	-1.12744	0.00725	Micu2	mitochondrial calcium uptake 2
	ENSMUSG00000021978	-0.731627	0.03605	Extl3	exostoses (multiple)-like 3
	ENSMUSG00000021996	-0.767505	0.0258	Esd	esterase D/formylglutathione hydrolase
	ENSMUSG00000021999	-0.941221	0.004	Cpb2	carboxypeptidase B2 (plasma)
	ENSMUSG00000022040	-1.32256	0.00015	Ephx2	epoxide hydrolase 2, cytoplasmic
	ENSMUSG00000022091	-0.96065	0.003	Sorbs3	sorbin and SH3 domain containing 3
	ENSMUSG00000022110	-0.680199	0.045	Sucla2	succinate-Coenzyme A ligase, ADP-forming, beta subunit
	ENSMUSG00000022142	-0.793705	0.01395	Nup155	nucleoporin 155
	ENSMUSG00000022193	-1.14352	0.00135	Psmb5	proteasome (prosome, macropain) subunit, beta type 5
	ENSMUSG00000022210	-0.755823	0.0202	Dhrs4	dehydrogenase/reductase (SDR family) member 4
	ENSMUSG00000022235	-0.806876	0.04195	Cmbl	carboxymethylenebutenolidase-like (Pseudomonas)
	ENSMUSG00000022244	-0.914796	0.00365	Amacr	alpha-methylacyl-CoA racemase
	ENSMUSG00000022283	-0.614531	0.04405	Pabpc1	poly(A) binding protein, cytoplasmic 1
	ENSMUSG00000022300	-0.949466	0.01925	Dcaf13	DDB1 and CUL4 associated factor 13
	ENSMUSG00000022312	-0.795401	0.02805	Eif3h	eukaryotic translation initiation factor 3, subunit H
	ENSMUSG00000022336	-0.784112	0.0493	Eif3e	eukaryotic translation initiation factor 3, subunit E
	ENSMUSG00000022354	-0.733863	0.0415	Ndufb9	NADH dehydrogenase (ubiquinone) 1 beta subcomplex, 9
	ENSMUSG00000022390	-0.861106	0.0099	Zc3h7b	zinc finger CCCH type containing 7B
	ENSMUSG00000022400	-1.06534	0.0301	Rbx1	ring-box 1
	ENSMUSG00000022437	-0.758434	0.0218	Samm50	SAMM50 sorting and assembly machinery component
	ENSMUSG00000022464	-0.825448	0.0265	Slc38a4	solute carrier family 38, member 4
	ENSMUSG00000022500	-1.0862	0.0402	Litaf	LPS-induced TN factor
	ENSMUSG00000022512	-1.14652	0.00055	Cldn1	claudin 1
	ENSMUSG00000022536	-0.723772	0.02825	Glyr1	glyoxylate reductase 1 homolog (Arabidopsis)
	ENSMUSG00000022540	-0.978012	0.03575	Rogdi	rogdi homolog
	ENSMUSG00000022551	-0.793637	0.022	Cyc1	cytochrome c-1
	ENSMUSG00000022564	-1.05391	0.00115	Grina	glutamate receptor, ionotropic, N-methyl D-aspartate-associated protein 1 (glutamate binding)
	ENSMUSG00000022617	-1.43664	0.0105	Chkb	choline kinase beta
	ENSMUSG00000022629	-0.741111	0.01505	Kif21a	kinesin family member 21A
	ENSMUSG00000022790	-1.07367	0.01445	Igsf11	immunoglobulin superfamily, member 11
	ENSMUSG00000022821	-1.32785	5e-05	Hgd	homogentisate 1, 2-dioxygenase
	ENSMUSG00000022828	-1.08844	0.00785	Gtf2e1	general transcription factor II E, polypeptide 1 (alpha subunit)
	ENSMUSG00000022853	-2.05963	5e-05	Ehhadh	enoyl-Coenzyme A, hydratase/3-hydroxyacyl Coenzyme A dehydrogenase
	ENSMUSG00000022912	-1.17467	0.0006	Pros1	protein S (alpha)
	ENSMUSG00000023019	-0.99987	0.0086	Gpd1	glycerol-3-phosphate dehydrogenase 1 (soluble)
	ENSMUSG00000023043	-0.899809	0.00405	Krt18	keratin 18
	ENSMUSG00000023044	-2.26154	5e-05	Csad	cysteine sulfinic acid decarboxylase
	ENSMUSG00000023055	-0.759534	0.0284	Calcoco1	calcium binding and coiled coil domain 1
	ENSMUSG00000023079	-1.13882	0.0008	Gtf2ird1	general transcription factor II I repeat domain-containing 1
	ENSMUSG00000023348	-0.81277	0.0361	Trip6	thyroid hormone receptor interactor 6
	ENSMUSG00000023456	-0.822908	0.0426	Tpi1	triosephosphate isomerase 1
	ENSMUSG00000024042	-0.815524	0.01925	Sik1	salt inducible kinase 1
	ENSMUSG00000024065	-0.654865	0.04675	Ehd3	EH-domain containing 3
	ENSMUSG00000024068	-0.707329	0.04485	Spast	spastin
	ENSMUSG00000024070	-1.03671	0.019	Prkd3	protein kinase D3
	ENSMUSG00000024099	-0.961054	0.0164	Ndufv2	NADH dehydrogenase (ubiquinone) flavoprotein 2
	ENSMUSG00000024271	-0.66984	0.04	Elp2	elongator acetyltransferase complex subunit 2
	ENSMUSG00000024360	-1.19122	0.03045	Etf1	eukaryotic translation termination factor 1
	ENSMUSG00000024382	-0.697592	0.04075	Ercc3	excision repair cross-complementing rodent repair deficiency, complementation group 3
	ENSMUSG00000024391	-1.18771	0.0001	Apom	apolipoprotein M
	ENSMUSG00000024404	-0.624079	0.0456	Riok3	RIO kinase 3
	ENSMUSG00000024413	-0.738863	0.03635	Npc1	Niemann-Pick type C1
	ENSMUSG00000024430	-1.77355	0.00025	Cabyr	calcium-binding tyrosine-(Y)-phosphorylation regulated (fibrousheathin 2)
	ENSMUSG00000024456	-1.17881	0.00105	Diap1
	ENSMUSG00000024493	-0.720201	0.02405	Lars	leucyl-tRNA synthetase
	ENSMUSG00000024507	-0.699986	0.0301	Hsd17b4	hydroxysteroid (17-beta) dehydrogenase 4
	ENSMUSG00000024589	-0.880487	0.00515	Nedd4l	neural precursor cell expressed, developmentally down-regulated gene 4-like
	ENSMUSG00000024608	-0.993816	0.00505	Rps14	ribosomal protein S14
	ENSMUSG00000024735	-0.737761	0.01915	Prpf19	pre-mRNA processing factor 19
	ENSMUSG00000024740	-0.727599	0.0163	Ddb1	damage specific DNA binding protein 1
	ENSMUSG00000024747	-1.0164	0.00145	Aldh1a7	aldehyde dehydrogenase family 1, subfamily A7
	ENSMUSG00000024759	-0.942488	0.00405	Atl3	atlastin GTPase 3
	ENSMUSG00000024781	-0.656978	0.0311	Lipa	lysosomal acid lipase A
	ENSMUSG00000024805	-0.876272	0.048	Pcgf5	polycomb group ring finger 5
	ENSMUSG00000024827	-1.05623	0.0008	Gldc	glycine decarboxylase
	ENSMUSG00000024843	-0.992761	0.04205	Chka	choline kinase alpha
	ENSMUSG00000024899	-0.706543	0.01915	Papss2	3'-phosphoadenosine 5'-phosphosulfate synthase 2
	ENSMUSG00000024900	-0.95566	0.0048	Cpt1a	carnitine palmitoyltransferase 1a, liver
	ENSMUSG00000024905	-1.48517	0.00295	Mtl5	metallothionein-like 5, testis-specific (tesmin)
	ENSMUSG00000024913	-0.788748	0.02075	Lrp5	low density lipoprotein receptor-related protein 5
	ENSMUSG00000024943	-0.605605	0.0479	Smc5	structural maintenance of chromosomes 5
	ENSMUSG00000024953	-0.931822	0.0494	Prdx5	peroxiredoxin 5
	ENSMUSG00000024962	-1.22286	0.0146	Vegfb	vascular endothelial growth factor B
	ENSMUSG00000024978	-1.18097	0.0093	Gpam	glycerol-3-phosphate acyltransferase, mitochondrial
	ENSMUSG00000024997	-0.950012	0.00665	Prdx3	peroxiredoxin 3
	ENSMUSG00000025059	-0.588995	0.04695	Gyk
	ENSMUSG00000025068	-0.970957	0.0076	Gsto1	glutathione S-transferase omega 1
	ENSMUSG00000025151	-0.668204	0.02775	Maged1	melanoma antigen, family D, 1
	ENSMUSG00000025162	-0.833675	0.0484	Csnk1d	casein kinase 1, delta
	ENSMUSG00000025190	-0.825476	0.03475	Got1	glutamic-oxaloacetic transaminase 1, soluble
	ENSMUSG00000025228	-0.765738	0.02375	Actr1a	ARP1 actin-related protein 1A, centractin alpha
	ENSMUSG00000025236	-0.968437	0.01035	Adpgk	ADP-dependent glucokinase
	ENSMUSG00000025239	-0.67764	0.04345	Limd1	LIM domains containing 1
	ENSMUSG00000025260	-1.20917	0.0004	Hsd17b10	hydroxysteroid (17-beta) dehydrogenase 10
	ENSMUSG00000025266	-1.61057	0.00345	Gnl3l	guanine nucleotide binding protein-like 3 (nucleolar)-like
	ENSMUSG00000025357	-1.02827	0.0095	Dgka	diacylglycerol kinase, alpha
	ENSMUSG00000025381	-1.15711	0.00665	Cnpy2	canopy FGF signaling regulator 2
	ENSMUSG00000025428	-0.776077	0.01805	Atp5a1	ATP synthase, H+ transporting, mitochondrial F1 complex, alpha subunit 1
	ENSMUSG00000025429	-0.94973	0.04835	Pstpip2	proline-serine-threonine phosphatase-interacting protein 2
	ENSMUSG00000025464	-2.27791	0.002	Paox	polyamine oxidase (exo-N4-amino)
	ENSMUSG00000025465	-0.855183	0.02045	Echs1	enoyl Coenzyme A hydratase, short chain, 1, mitochondrial
	ENSMUSG00000025497	-0.961652	0.0056	Cdhr5	cadherin-related family member 5
	ENSMUSG00000025509	-1.33753	0.00045	Pnpla2	patatin-like phospholipase domain containing 2
	ENSMUSG00000025533	-1.63903	0.00025	Asl	argininosuccinate lyase
	ENSMUSG00000025545	-0.78579	0.0446	Clybl	citrate lyase beta like
	ENSMUSG00000025579	-0.777941	0.02445	Gaa	glucosidase, alpha, acid
	ENSMUSG00000025630	-1.02385	0.011	Hprt	hypoxanthine guanine phosphoribosyl transferase
	ENSMUSG00000025745	-0.812859	0.04205	Hadha	hydroxyacyl-Coenzyme A dehydrogenase/3-ketoacyl-Coenzyme A thiolase/enoyl-Coenzyme A hydratase (trifunctional protein), alpha subunit
	ENSMUSG00000025795	-0.757238	0.0258	Rassf3	Ras association (RalGDS/AF-6) domain family member 3
	ENSMUSG00000025962	-1.61075	0.00455	Fastkd2	FAST kinase domains 2
	ENSMUSG00000026112	-1.31209	0.00035	Coa5	cytochrome C oxidase assembly factor 5
	ENSMUSG00000026202	-0.890423	0.0353	Tuba4a	tubulin, alpha 4A
	ENSMUSG00000026272	-1.22846	0.00035	Agxt	alanine-glyoxylate aminotransferase
	ENSMUSG00000026342	-0.793327	0.0444	Slc35f5	solute carrier family 35, member F5
	ENSMUSG00000026368	-0.705701	0.01895	F13b	coagulation factor XIII, beta subunit
	ENSMUSG00000026374	-0.857025	0.0282	Tsn	translin
	ENSMUSG00000026385	-0.632976	0.0391	Dbi	diazepam binding inhibitor
	ENSMUSG00000026390	-2.11688	0.0001	Marco	macrophage receptor with collagenous structure
	ENSMUSG00000026509	-0.750814	0.0212	Capn2	calpain 2
	ENSMUSG00000026526	-1.22813	0.0227	Fh1	fumarate hydratase 1
	ENSMUSG00000026542	-1.10726	0.0035	Apcs	serum amyloid P-component
	ENSMUSG00000026571	-0.9847	0.0013	Dcaf6	DDB1 and CUL4 associated factor 6
	ENSMUSG00000026615	-0.648744	0.02595	Eprs	glutamyl-prolyl-tRNA synthetase
	ENSMUSG00000026621	-0.767079	0.01685	Marc1	mitochondrial amidoxime reducing component 1
	ENSMUSG00000026638	-1.49249	0.00275	Irf6	interferon regulatory factor 6
	ENSMUSG00000026663	-0.61925	0.0415	Atf6	activating transcription factor 6
	ENSMUSG00000026664	-0.753037	0.0222	Phyh	phytanoyl-CoA hydroxylase
	ENSMUSG00000026739	-1.28955	0.0189	Bmi1	Bmi1 polycomb ring finger oncogene
	ENSMUSG00000026766	-0.850969	0.0165	Mmadhc	methylmalonic aciduria (cobalamin deficiency) cblD type, with homocystinuria
	ENSMUSG00000026768	-1.26645	0.01965	Itga8	integrin alpha 8
	ENSMUSG00000026822	-4.02439	5e-05	Lcn2	lipocalin 2
	ENSMUSG00000026853	-1.0644	0.00975	Crat	carnitine acetyltransferase
	ENSMUSG00000026858	-0.906647	0.0091	Fam73b	family with sequence similarity 73, member B
	ENSMUSG00000026866	-0.99158	0.0015	Kynu	kynureninase (L-kynurenine hydrolase)
	ENSMUSG00000026869	-1.02165	0.0175	Psmd5	proteasome (prosome, macropain) 26S subunit, non-ATPase, 5
	ENSMUSG00000026888	-1.00853	0.00455	Grb14	growth factor receptor bound protein 14
	ENSMUSG00000026939	-1.77566	0.01305	Tmem141	transmembrane protein 141
	ENSMUSG00000026972	-0.987365	0.035	Arrdc1	arrestin domain containing 1
	ENSMUSG00000027048	-0.715403	0.0326	Abcb11	ATP-binding cassette, sub-family B (MDR/TAP), member 11
	ENSMUSG00000027184	-0.882172	0.04655	Caprin1	cell cycle associated protein 1
	ENSMUSG00000027359	-1.00508	0.0188	Slc27a2	solute carrier family 27 (fatty acid transporter), member 2
	ENSMUSG00000027366	-1.19467	0.0118	Sppl2a	signal peptide peptidase like 2A
	ENSMUSG00000027502	-1.34773	0.0003	Rtfdc1	replication termination factor 2 domain containing 1
	ENSMUSG00000027513	-0.881181	0.04065	Pck1	phosphoenolpyruvate carboxykinase 1, cytosolic
	ENSMUSG00000027601	-0.879181	0.0349	Mtfr1	mitochondrial fission regulator 1
	ENSMUSG00000027613	-1.0374	0.00955	Eif6	eukaryotic translation initiation factor 6
	ENSMUSG00000027660	-1.02736	0.0132	Skil	SKI-like
	ENSMUSG00000027800	-1.48538	0.00415	Tm4sf1	transmembrane 4 superfamily member 1
	ENSMUSG00000027801	-0.96978	0.0075	Tm4sf4	transmembrane 4 superfamily member 4
	ENSMUSG00000027809	-1.04406	0.0077	Etfdh	electron transferring flavoprotein, dehydrogenase
	ENSMUSG00000027890	-1.35459	0.01615	Gstm4	glutathione S-transferase, mu 4
	ENSMUSG00000027944	-1.01756	0.00625	Hax1	HCLS1 associated X-1
	ENSMUSG00000027952	-1.83679	0.02675	Pmvk	phosphomevalonate kinase
	ENSMUSG00000028013	-1.00084	0.0107	Ppa2	pyrophosphatase (inorganic) 2
	ENSMUSG00000028042	-0.804306	0.03555	Zbtb7b	zinc finger and BTB domain containing 7B
	ENSMUSG00000028059	-0.825705	0.01475	Arhgef2	rho/rac guanine nucleotide exchange factor (GEF) 2
	ENSMUSG00000028081	-0.895568	0.009	Rps3a1	ribosomal protein S3A1
	ENSMUSG00000028127	-0.846442	0.0056	Abcd3	ATP-binding cassette, sub-family D (ALD), member 3
	ENSMUSG00000028132	-0.893216	0.0256	Tmem56	transmembrane protein 56
	ENSMUSG00000028138	-0.797903	0.0085	Adh5	alcohol dehydrogenase 5 (class III), chi polypeptide
	ENSMUSG00000028145	-0.950993	0.01015	Them4	thioesterase superfamily member 4
	ENSMUSG00000028156	-1.01714	0.00935	Eif4e	eukaryotic translation initiation factor 4E
	ENSMUSG00000028158	-1.07406	0.00125	Mttp	microsomal triglyceride transfer protein
	ENSMUSG00000028179	-2.4921	5e-05	Cth	cystathionase (cystathionine gamma-lyase)
	ENSMUSG00000028223	-0.718483	0.022	Decr1	2,4-dienoyl CoA reductase 1, mitochondrial
	ENSMUSG00000028247	-0.820753	0.0345	Coq3	coenzyme Q3 methyltransferase
	ENSMUSG00000028456	-1.47163	0.0045	Unc13b	unc-13 homolog B (C. elegans)
	ENSMUSG00000028494	-1.14107	0.0022	Plin2	perilipin 2
	ENSMUSG00000028495	-1.32098	0.0003	Rps6	ribosomal protein S6
	ENSMUSG00000028618	-0.723112	0.04565	Tmem59	transmembrane protein 59
	ENSMUSG00000028630	-0.758272	0.0481	Dyrk2	dual-specificity tyrosine-(Y)-phosphorylation regulated kinase 2
	ENSMUSG00000028645	-1.1209	0.03665	Slc2a1	solute carrier family 2 (facilitated glucose transporter), member 1
	ENSMUSG00000028653	-1.06723	0.0498	Trit1	tRNA isopentenyltransferase 1
	ENSMUSG00000028668	-0.675967	0.0385	Tceb3	transcription elongation factor B (SIII), polypeptide 3
	ENSMUSG00000028669	-0.961327	0.0444	Pithd1	PITH (C-terminal proteasome-interacting domain of thioredoxin-like) domain containing 1
	ENSMUSG00000028672	-0.818871	0.01145	Hmgcl	3-hydroxy-3-methylglutaryl-Coenzyme A lyase
	ENSMUSG00000028683	-1.07041	0.01215	Eif2b3	eukaryotic translation initiation factor 2B, subunit 3
	ENSMUSG00000028684	-0.912808	0.0273	Urod	uroporphyrinogen decarboxylase
	ENSMUSG00000028691	-0.796757	0.0321	Prdx1	peroxiredoxin 1
	ENSMUSG00000028712	-2.1705	5e-05	Cyp4a31	cytochrome P450, family 4, subfamily a, polypeptide 31
	ENSMUSG00000028715	-1.67434	0.0014	Cyp4a14	cytochrome P450, family 4, subfamily a, polypeptide 14
	ENSMUSG00000028741	-1.15777	0.0087	Mrto4	mRNA turnover 4, ribosome maturation factor
	ENSMUSG00000028771	-0.905404	0.0343	Ptpn12	protein tyrosine phosphatase, non-receptor type 12
	ENSMUSG00000028798	-1.01042	0.0116	Eif3i	eukaryotic translation initiation factor 3, subunit I
	ENSMUSG00000028932	-0.845182	0.01595	Psmc2	proteasome (prosome, macropain) 26S subunit, ATPase 2
	ENSMUSG00000028982	-1.26965	0.0094	Slc25a33	solute carrier family 25, member 33
	ENSMUSG00000029009	-1.37001	0.001	Mthfr	5,10-methylenetetrahydrofolate reductase
	ENSMUSG00000029017	-0.765262	0.0282	Pmpcb	peptidase (mitochondrial processing) beta
	ENSMUSG00000029034	-0.939043	0.0434	Cpsf3l	cleavage and polyadenylation specific factor 3-like
	ENSMUSG00000029064	-1.03529	0.0463	Gnb1	guanine nucleotide binding protein (G protein), beta 1
	ENSMUSG00000029119	-0.908403	0.01075	Man2b2	mannosidase 2, alpha B2
	ENSMUSG00000029147	-0.786372	0.0314	Ppm1g	protein phosphatase 1G (formerly 2C), magnesium-dependent, gamma isoform
	ENSMUSG00000029166	-0.665758	0.03785	Mapre3	microtubule-associated protein, RP/EB family, member 3
	ENSMUSG00000029195	-0.724732	0.0451	Klb	klotho beta
	ENSMUSG00000029238	-0.904239	0.00325	Clock	circadian locomotor output cycles kaput
	ENSMUSG00000029304	-1.71172	0.00235	Spp1	secreted phosphoprotein 1
	ENSMUSG00000029456	-0.725337	0.0391	Acad10	acyl-Coenzyme A dehydrogenase family, member 10
	ENSMUSG00000029458	-1.11274	0.005	Brap	BRCA1 associated protein
	ENSMUSG00000029499	-1.05548	0.04575	Pxmp2	peroxisomal membrane protein 2
	ENSMUSG00000029545	-0.862084	0.0209	Acads	acyl-Coenzyme A dehydrogenase, short chain
	ENSMUSG00000029596	-1.69943	0.0068	Sdsl	serine dehydratase-like
	ENSMUSG00000029617	-0.822557	0.0381	Ccz1	CCZ1 vacuolar protein trafficking and biogenesis associated
	ENSMUSG00000029630	-1.06044	0.0141	Cyp3a25	cytochrome P450, family 3, subfamily a, polypeptide 25
	ENSMUSG00000029632	-0.659311	0.03685	Ndufa4	NADH dehydrogenase (ubiquinone) 1 alpha subcomplex, 4
	ENSMUSG00000029656	-1.18091	0.00085	C8b	complement component 8, beta polypeptide
	ENSMUSG00000029672	-1.11626	0.02895	Fam3c	family with sequence similarity 3, member C
	ENSMUSG00000029695	-1.01447	0.003	Aass	aminoadipate-semialdehyde synthase
	ENSMUSG00000029781	-0.918114	0.01915	Fkbp9	FK506 binding protein 9
	ENSMUSG00000029802	-0.875398	0.00225	Abcg2	ATP-binding cassette, sub-family G (WHITE), member 2
	ENSMUSG00000030004	-1.05661	0.0155	Nat8	N-acetyltransferase 8 (GCN5-related)
	ENSMUSG00000030091	-1.16796	0.03925	Nup210	nucleoporin 210
	ENSMUSG00000030120	-0.712668	0.0394	Mlf2	myeloid leukemia factor 2
	ENSMUSG00000030161	-0.672508	0.04205	Gabarapl1	gamma-aminobutyric acid (GABA) A receptor-associated protein-like 1
	ENSMUSG00000030203	-0.683541	0.03745	Dusp16	dual specificity phosphatase 16
	ENSMUSG00000030207	-0.921004	0.022	8430419L09Rik
	ENSMUSG00000030244	-0.707716	0.01875	Gys2	glycogen synthase 2
	ENSMUSG00000030281	-1.02474	0.03545	Il17rc	interleukin 17 receptor C
	ENSMUSG00000030342	-0.853452	0.0337	Cd9	CD9 antigen
	ENSMUSG00000030471	-1.12665	0.04125	Zdhhc13	zinc finger, DHHC domain containing 13
	ENSMUSG00000030494	-1.05475	0.049	Rhpn2	rhophilin, Rho GTPase binding protein 2
	ENSMUSG00000030512	-0.944902	0.01555	Snrpa1	small nuclear ribonucleoprotein polypeptide A'
	ENSMUSG00000030538	-1.03194	0.01775	Cib1	calcium and integrin binding 1 (calmyrin)
	ENSMUSG00000030643	-1.15869	0.00225	Rab30	RAB30, member RAS oncogene family
	ENSMUSG00000030681	-0.82863	0.0179	Mvp	major vault protein
	ENSMUSG00000030695	-0.86262	0.01775	Aldoa	aldolase A, fructose-bisphosphate
	ENSMUSG00000030701	-1.10212	0.03495	Plekhb1	pleckstrin homology domain containing, family B (evectins) member 1
	ENSMUSG00000030738	-0.636157	0.0449	Eif3c	eukaryotic translation initiation factor 3, subunit C
	ENSMUSG00000030827	-1.56961	0.0009	Fgf21	fibroblast growth factor 21
	ENSMUSG00000030835	-0.780366	0.0164	Nomo1	nodal modulator 1
	ENSMUSG00000030876	-1.06068	0.04525	Mettl9	methyltransferase like 9
	ENSMUSG00000030884	-0.836989	0.0161	Uqcrc2	ubiquinol cytochrome c reductase core protein 2
	ENSMUSG00000030895	-1.24955	0.01855	Hpx	hemopexin
	ENSMUSG00000031024	-1.18681	0.0013	St5	suppression of tumorigenicity 5
	ENSMUSG00000031320	-1.11499	0.002	Rps4x	ribosomal protein S4, X-linked
	ENSMUSG00000031360	-1.25591	0.02275	Ctps2	cytidine 5'-triphosphate synthase 2
	ENSMUSG00000031447	-0.686533	0.02935	Lamp1	lysosomal-associated membrane protein 1
	ENSMUSG00000031482	-1.52203	5e-05	Slc25a15	solute carrier family 25 (mitochondrial carrier ornithine transporter), member 15
	ENSMUSG00000031483	-0.83001	0.01125	Erlin2	ER lipid raft associated 2
	ENSMUSG00000031545	-0.62921	0.0446	Agpat6
	ENSMUSG00000031556	-1.27884	0.00885	Tm2d2	TM2 domain containing 2
	ENSMUSG00000031565	-1.70614	0.0001	Fgfr1	fibroblast growth factor receptor 1
	ENSMUSG00000031585	-0.845093	0.04425	Gtf2e2	general transcription factor II E, polypeptide 2 (beta subunit)
	ENSMUSG00000031594	-1.19211	0.0035	Fgl1	fibrinogen-like protein 1
	ENSMUSG00000031604	-0.959665	0.00775	Sc4mol
	ENSMUSG00000031701	-0.75602	0.02405	Dnaja2	DnaJ heat shock protein family (Hsp40) member A2
	ENSMUSG00000031762	-2.02156	0.0005	Mt2	metallothionein 2
	ENSMUSG00000031765	-1.95379	5e-05	Mt1	metallothionein 1
	ENSMUSG00000031788	-0.978009	0.0218	Kifc3	kinesin family member C3
	ENSMUSG00000031808	-1.09649	0.00155	Slc27a1	solute carrier family 27 (fatty acid transporter), member 1
	ENSMUSG00000031842	-1.15705	0.00445	Pde4c	phosphodiesterase 4C, cAMP specific
	ENSMUSG00000031948	-0.750133	0.04085	Kars	lysyl-tRNA synthetase
	ENSMUSG00000031950	-0.924292	0.0168	Gabarapl2	gamma-aminobutyric acid (GABA) A receptor-associated protein-like 2
	ENSMUSG00000032009	-1.22723	0.0101	Sesn3	sestrin 3
	ENSMUSG00000032012	-0.737621	0.0279	Pvrl1
	ENSMUSG00000032014	-0.835875	0.01055	Oaf	out at first homolog
	ENSMUSG00000032059	-1.17294	0.0486	Alg9	asparagine-linked glycosylation 9 (alpha 1,2 mannosyltransferase)
	ENSMUSG00000032066	-0.975945	0.0229	Bco2	beta-carotene oxygenase 2
	ENSMUSG00000032067	-1.12777	0.02075	Pts	6-pyruvoyl-tetrahydropterin synthase
	ENSMUSG00000032077	-0.959952	0.0083	Bud13	BUD13 homolog
	ENSMUSG00000032114	-0.66027	0.04155	Slc37a4	solute carrier family 37 (glucose-6-phosphate transporter), member 4
	ENSMUSG00000032193	-0.658149	0.03415	Ldlr	low density lipoprotein receptor
	ENSMUSG00000032249	-0.786162	0.04025	Anp32a	acidic (leucine-rich) nuclear phosphoprotein 32 family, member A
	ENSMUSG00000032271	-1.27654	0.0001	Nnmt	nicotinamide N-methyltransferase
	ENSMUSG00000032288	-0.839946	0.0424	Imp3	IMP3, U3 small nucleolar ribonucleoprotein
	ENSMUSG00000032301	-1.00136	0.0038	Psma4	proteasome (prosome, macropain) subunit, alpha type 4
	ENSMUSG00000032314	-0.851316	0.0164	Etfa	electron transferring flavoprotein, alpha polypeptide
	ENSMUSG00000032359	-0.776798	0.0366	Ctsh	cathepsin H
	ENSMUSG00000032366	-1.19153	0.0023	Tpm1	tropomyosin 1, alpha
	ENSMUSG00000032386	-0.792846	0.01305	Trip4	thyroid hormone receptor interactor 4
	ENSMUSG00000032399	-0.935392	0.00455	Rpl4	ribosomal protein L4
	ENSMUSG00000032418	-1.12271	0.0005	Me1	malic enzyme 1, NADP(+)-dependent, cytosolic
	ENSMUSG00000032518	-1.18313	0.03885	Rpsa	ribosomal protein SA
	ENSMUSG00000032548	-1.59715	0.02705	Slco2a1	solute carrier organic anion transporter family, member 2a1
	ENSMUSG00000032590	-0.690553	0.0288	Apeh	acylpeptide hydrolase
	ENSMUSG00000032601	-0.939673	0.00735	Prkar2a	protein kinase, cAMP dependent regulatory, type II alpha
	ENSMUSG00000032602	-0.814745	0.00965	Slc25a20	solute carrier family 25 (mitochondrial carnitine/acylcarnitine translocase), member 20
	ENSMUSG00000032607	-0.82084	0.02195	Amt	aminomethyltransferase
	ENSMUSG00000032724	-1.45971	0.00055	Abtb2	ankyrin repeat and BTB (POZ) domain containing 2
	ENSMUSG00000032777	-0.738042	0.0186	Gtf3c1	general transcription factor III C 1
	ENSMUSG00000032827	-0.914459	0.0232	Ppp1r9a	protein phosphatase 1, regulatory (inhibitor) subunit 9A
	ENSMUSG00000032834	-0.877282	0.025	Pwp2	PWP2 periodic tryptophan protein homolog (yeast)
	ENSMUSG00000032898	-1.26826	5e-05	Fbxo21	F-box protein 21
	ENSMUSG00000032902	-1.14798	0.00085	Slc16a1	solute carrier family 16 (monocarboxylic acid transporters), member 1
	ENSMUSG00000033009	-1.20533	0.0485	Ogfod1	2-oxoglutarate and iron-dependent oxygenase domain containing 1
	ENSMUSG00000033039	-0.653087	0.0419	Micall1	microtubule associated monooxygenase, calponin and LIM domain containing -like 1
	ENSMUSG00000033107	-1.5416	5e-05	Rnf125	ring finger protein 125
	ENSMUSG00000033429	-0.83446	0.02815	Mcee	methylmalonyl CoA epimerase
	ENSMUSG00000033589	-1.15898	0.018	Reep4	receptor accessory protein 4
	ENSMUSG00000033610	-1.02303	0.00145	Pank1	pantothenate kinase 1
	ENSMUSG00000033629	-0.826031	0.007	Ptplad1
	ENSMUSG00000033634	-0.73563	0.0431	Cml2
	ENSMUSG00000033684	-0.684579	0.0389	Qsox1	quiescin Q6 sulfhydryl oxidase 1
	ENSMUSG00000033845	-1.02602	0.00745	Mrpl15	mitochondrial ribosomal protein L15
	ENSMUSG00000034101	-0.762767	0.0111	Ctnnd1	catenin (cadherin associated protein), delta 1
	ENSMUSG00000034108	-0.796757	0.00835	Ccs	copper chaperone for superoxide dismutase
	ENSMUSG00000034258	-1.05422	0.01015	Mfsd7c	major facilitator superfamily domain containing 7C
	ENSMUSG00000034382	-0.91777	0.02515	AI661453	expressed sequence AI661453
	ENSMUSG00000034403	-0.959177	0.0052	Pja1	praja ring finger 1, E3 ubiquitin protein ligase
	ENSMUSG00000034528	-0.731644	0.02375	Hsd17b13	hydroxysteroid (17-beta) dehydrogenase 13
	ENSMUSG00000034566	-0.678212	0.0481	Atp5h	ATP synthase, H+ transporting, mitochondrial F0 complex, subunit D
	ENSMUSG00000034708	-1.25914	0.0002	Grn	granulin
	ENSMUSG00000034709	-0.850937	0.0152	Ppp1r21	protein phosphatase 1, regulatory subunit 21
	ENSMUSG00000034758	-1.63903	0.0012	Tle6	transducin-like enhancer of split 6
	ENSMUSG00000034807	-0.840845	0.0148	Colgalt1	collagen beta(1-O)galactosyltransferase 1
	ENSMUSG00000034926	-0.819509	0.0185	Dhcr24	24-dehydrocholesterol reductase
	ENSMUSG00000035049	-0.777688	0.03075	Rrp12	ribosomal RNA processing 12 homolog (S. cerevisiae)
	ENSMUSG00000035150	-1.21865	0.02705	Eif2s3x	eukaryotic translation initiation factor 2, subunit 3, structural gene X-linked
	ENSMUSG00000035237	-0.724707	0.0475	Lcat	lecithin cholesterol acyltransferase
	ENSMUSG00000035530	-0.903268	0.01735	Eif1	eukaryotic translation initiation factor 1
	ENSMUSG00000036151	-0.880376	0.04015	Tm6sf2	transmembrane 6 superfamily member 2
	ENSMUSG00000036181	-0.89165	0.01075	Hist1h1c	histone cluster 1, H1c
	ENSMUSG00000036199	-0.730338	0.0442	Ndufa13	NADH dehydrogenase (ubiquinone) 1 alpha subcomplex, 13
	ENSMUSG00000036427	-0.715939	0.0209	Gpi1	glucose phosphate isomerase 1
	ENSMUSG00000036478	-1.06126	0.00595	Btg1	B cell translocation gene 1, anti-proliferative
	ENSMUSG00000036501	-0.727781	0.0214	Fam13b	family with sequence similarity 13, member B
	ENSMUSG00000036528	-0.793646	0.0177	Ppfibp2	PTPRF interacting protein, binding protein 2 (liprin beta 2)
	ENSMUSG00000036561	-0.677662	0.03345	Ppp6r2	protein phosphatase 6, regulatory subunit 2
	ENSMUSG00000036611	-0.87813	0.0125	Eepd1	endonuclease/exonuclease/phosphatase family domain containing 1
	ENSMUSG00000036751	-0.687286	0.0297	Cox6b1	cytochrome c oxidase, subunit VIb polypeptide 1
	ENSMUSG00000036775	-0.919666	0.01955	Decr2	2-4-dienoyl-Coenzyme A reductase 2, peroxisomal
	ENSMUSG00000036781	-1.07217	0.0029	Rps27l	ribosomal protein S27-like
	ENSMUSG00000036880	-0.640232	0.0474	Acaa2	acetyl-Coenzyme A acyltransferase 2 (mitochondrial 3-oxoacyl-Coenzyme A thiolase)
	ENSMUSG00000036957	-1.8673	0.00045	Lrfn3	leucine rich repeat and fibronectin type III domain containing 3
	ENSMUSG00000037089	-1.72037	0.00145	Slc35b2	solute carrier family 35, member B2
	ENSMUSG00000037119	-0.712533	0.0269	D15Ertd621e
	ENSMUSG00000037134	-0.821714	0.04275	Prmt10
	ENSMUSG00000037149	-0.734356	0.03255	Ddx1	DEAD (Asp-Glu-Ala-Asp) box polypeptide 1
	ENSMUSG00000037204	-0.92417	0.00825	9430023L20Rik
	ENSMUSG00000037254	-0.875681	0.0146	Itih2	inter-alpha trypsin inhibitor, heavy chain 2
	ENSMUSG00000037257	-0.794675	0.0483	Aagab	alpha- and gamma-adaptin binding protein
	ENSMUSG00000037260	-0.814182	0.02115	Hgsnat	heparan-alpha-glucosaminide N-acetyltransferase
	ENSMUSG00000037278	-0.931927	0.01095	Tmem97	transmembrane protein 97
	ENSMUSG00000037353	-0.740834	0.0367	Letmd1	LETM1 domain containing 1
	ENSMUSG00000037379	-1.25375	0.0048	Spon2	spondin 2, extracellular matrix protein
	ENSMUSG00000037415	-0.753282	0.01725	Ranbp10	RAN binding protein 10
	ENSMUSG00000037503	-0.746555	0.03975	Fam168b	family with sequence similarity 168, member B
	ENSMUSG00000037583	-0.729339	0.04375	Nr0b2	nuclear receptor subfamily 0, group B, member 2
	ENSMUSG00000037787	-1.24701	0.0128	Apopt1	apoptogenic, mitochondrial 1
	ENSMUSG00000037798	-1.50898	0.00065	Mat1a	methionine adenosyltransferase I, alpha
	ENSMUSG00000037826	-0.863993	0.0115	Ppm1k	protein phosphatase 1K (PP2C domain containing)
	ENSMUSG00000038150	-0.673217	0.04335	Ormdl3	ORM1-like 3 (S. cerevisiae)
	ENSMUSG00000038235	-1.13994	0.00215	F11r	F11 receptor
	ENSMUSG00000038256	-1.02489	0.0413	Bcl9	B cell CLL/lymphoma 9
	ENSMUSG00000038374	-0.799766	0.0343	Rbm8a	RNA binding motif protein 8a
	ENSMUSG00000038383	-0.830011	0.0431	Pigu	phosphatidylinositol glycan anchor biosynthesis, class U
	ENSMUSG00000038403	-0.761294	0.0191	Hfe2	hemochromatosis type 2 (juvenile)
	ENSMUSG00000038418	-3.53634	5e-05	Egr1	early growth response 1
	ENSMUSG00000038515	-1.45473	5e-05	Grtp1	GH regulated TBC protein 1
	ENSMUSG00000038539	-1.36641	0.0051	Atf5	activating transcription factor 5
	ENSMUSG00000038576	-1.15881	0.0015	Susd4	sushi domain containing 4
	ENSMUSG00000038658	-0.745792	0.02685	C030046E11Rik
	ENSMUSG00000038717	-0.768982	0.01795	Atp5l	ATP synthase, H+ transporting, mitochondrial F0 complex, subunit G
	ENSMUSG00000038754	-1.6898	5e-05	Elovl3	elongation of very long chain fatty acids (FEN1/Elo2, SUR4/Elo3, yeast)-like 3
	ENSMUSG00000038776	-0.910967	0.0031	Ephx1	epoxide hydrolase 1, microsomal
	ENSMUSG00000038780	-0.872771	0.0319	Smurf1	SMAD specific E3 ubiquitin protein ligase 1
	ENSMUSG00000038886	-0.840062	0.00835	Man2a2	mannosidase 2, alpha 2
	ENSMUSG00000039001	-0.981214	0.02585	Rps21	ribosomal protein S21
	ENSMUSG00000039018	-1.56792	0.0145	Mtg1	mitochondrial ribosome-associated GTPase 1
	ENSMUSG00000039062	-0.72263	0.0175	Anpep	alanyl (membrane) aminopeptidase
	ENSMUSG00000039145	-2.2881	0.0011	Camk1d	calcium/calmodulin-dependent protein kinase ID
	ENSMUSG00000039183	-0.799596	0.03885	Nubp2	nucleotide binding protein 2
	ENSMUSG00000039202	-0.916457	0.0078	Abhd2	abhydrolase domain containing 2
	ENSMUSG00000039298	-1.62526	0.0191	Cdk5rap2	CDK5 regulatory subunit associated protein 2
	ENSMUSG00000039323	-1.13466	0.01035	Igfbp2	insulin-like growth factor binding protein 2
	ENSMUSG00000039349	-0.672263	0.03365	C130074G19Rik	RIKEN cDNA C130074G19 gene
	ENSMUSG00000039616	-0.953825	0.0036	Mocos	molybdenum cofactor sulfurase
	ENSMUSG00000039745	-1.0741	0.00815	Htatip2	HIV-1 Tat interactive protein 2
	ENSMUSG00000039879	-0.696329	0.04595	Heca	hdc homolog, cell cycle regulator
	ENSMUSG00000039886	-1.19307	0.00185	Tmem120a	transmembrane protein 120A
	ENSMUSG00000039952	-0.92218	0.0066	Dag1	dystroglycan 1
	ENSMUSG00000040006	-0.995648	0.0271	Ginm1	glycoprotein integral membrane 1
	ENSMUSG00000040007	-1.32983	0.00165	Bahd1	bromo adjacent homology domain containing 1
	ENSMUSG00000040026	-3.94992	5e-05	Saa3	serum amyloid A 3
	ENSMUSG00000040028	-0.71017	0.0278	Elavl1	ELAV (embryonic lethal, abnormal vision)-like 1 (Hu antigen R)
	ENSMUSG00000040128	-0.679595	0.0442	Pnrc1	proline-rich nuclear receptor coactivator 1
	ENSMUSG00000040385	-0.808178	0.0298	Ppp1ca	protein phosphatase 1, catalytic subunit, alpha isoform
	ENSMUSG00000040466	-0.789291	0.01935	Blvrb	biliverdin reductase B (flavin reductase (NADPH))
	ENSMUSG00000040471	-0.84522	0.0286	Ggt6	gamma-glutamyltransferase 6
	ENSMUSG00000040548	-0.757184	0.0226	Tex2	testis expressed gene 2
	ENSMUSG00000040557	-0.889108	0.04215	Wbscr27	Williams Beuren syndrome chromosome region 27 (human)
	ENSMUSG00000040652	-1.3765	0.01015	Oaz2	ornithine decarboxylase antizyme 2
	ENSMUSG00000040706	-0.774986	0.01835	Agmat	agmatine ureohydrolase (agmatinase)
	ENSMUSG00000040712	-0.821486	0.0171	Camta2	calmodulin binding transcription activator 2
	ENSMUSG00000040722	-0.757386	0.0373	Scamp5	secretory carrier membrane protein 5
	ENSMUSG00000040731	-0.628607	0.0404	Eif4h	eukaryotic translation initiation factor 4H
	ENSMUSG00000040740	-0.993671	0.0167	Slc25a34	solute carrier family 25, member 34
	ENSMUSG00000040848	-1.33523	0.00395	Sft2d2	SFT2 domain containing 2
	ENSMUSG00000040928	-0.985344	0.04875	S100pbp	S100P binding protein
	ENSMUSG00000041028	-0.693442	0.0326	Ghitm	growth hormone inducible transmembrane protein
	ENSMUSG00000041119	-0.931155	0.0337	Pde9a	phosphodiesterase 9A
	ENSMUSG00000041362	-0.93841	0.00615	4930506M07Rik
	ENSMUSG00000041438	-1.12957	0.006	Cirh1a	cirrhosis, autosomal recessive 1A (human)
	ENSMUSG00000041571	-1.22146	0.0032	Sepw1	selenoprotein W, muscle 1
	ENSMUSG00000041650	-0.668642	0.0394	Pcca	propionyl-Coenzyme A carboxylase, alpha polypeptide
	ENSMUSG00000041688	-0.961292	0.04415	Amot	angiomotin
	ENSMUSG00000041740	-0.772108	0.019	Rnf10	ring finger protein 10
	ENSMUSG00000041779	-0.738227	0.0189	Tram2	translocating chain-associating membrane protein 2
	ENSMUSG00000041845	-1.50625	0.014	Rhod	ras homolog family member D
	ENSMUSG00000041957	-0.717023	0.02605	Pkp2	plakophilin 2
	ENSMUSG00000042010	-1.07046	0.0009	Acacb	acetyl-Coenzyme A carboxylase beta
	ENSMUSG00000042041	-0.898459	0.02565	2010003K11Rik	RIKEN cDNA 2010003K11 gene
	ENSMUSG00000042102	-0.9387	0.003	Dmgdh	dimethylglycine dehydrogenase precursor
	ENSMUSG00000042118	-0.776647	0.01295	Bhmt2	betaine-homocysteine methyltransferase 2
	ENSMUSG00000042476	-1.22601	0.00035	Abcb4	ATP-binding cassette, sub-family B (MDR/TAP), member 4
	ENSMUSG00000042487	-0.849439	0.0282	Leo1	Leo1, Paf1/RNA polymerase II complex component
	ENSMUSG00000042541	-0.910518	0.03735	Shfm1	split hand/foot malformation (ectrodactyly) type 1
	ENSMUSG00000043183	-1.04045	0.03615	Simc1	SUMO-interacting motifs containing 1
	ENSMUSG00000043207	-0.703204	0.0418	Zmpste24	zinc metallopeptidase, STE24
	ENSMUSG00000043716	-0.792745	0.02265	Rpl7	ribosomal protein L7
	ENSMUSG00000044005	-1.06503	0.0087	Gls2	glutaminase 2 (liver, mitochondrial)
	ENSMUSG00000044037	-0.874163	0.0307	Als2cl	ALS2 C-terminal like
	ENSMUSG00000044206	-1.02822	0.04045	Vsig4	V-set and immunoglobulin domain containing 4
	ENSMUSG00000044221	-0.968652	0.02195	Grsf1	G-rich RNA sequence binding factor 1
	ENSMUSG00000044254	-0.8103	0.02745	Pcsk9	proprotein convertase subtilisin/kexin type 9
	ENSMUSG00000044349	-1.51458	0.0163	Snhg11	small nucleolar RNA host gene 11
	ENSMUSG00000044469	-0.830958	0.0224	Tnfaip8l1	tumor necrosis factor, alpha-induced protein 8-like 1
	ENSMUSG00000044573	-0.985981	0.0179	Acp1	acid phosphatase 1, soluble
	ENSMUSG00000044788	-0.854561	0.0056	Fads6	fatty acid desaturase domain family, member 6
	ENSMUSG00000044792	-0.987234	0.02165	Isca1	iron-sulfur cluster assembly 1
	ENSMUSG00000045039	-0.952889	0.011	Megf8	multiple EGF-like-domains 8
	ENSMUSG00000045095	-0.657183	0.03985	Magi1	membrane associated guanylate kinase, WW and PDZ domain containing 1
	ENSMUSG00000046062	-0.747938	0.0197	Ppp1r15b	protein phosphatase 1, regulatory (inhibitor) subunit 15b
	ENSMUSG00000046687	-1.02216	0.02065	Gm5424	argininosuccinate synthase pseudogene
	ENSMUSG00000047153	-0.956971	0.0477	Khnyn	KH and NYN domain containing
	ENSMUSG00000047407	-0.747984	0.04145	Tgif1	TGFB-induced factor homeobox 1
	ENSMUSG00000047454	-0.598902	0.0462	Gphn	gephyrin
	ENSMUSG00000047867	-1.29833	0.0342	Gimap6	GTPase, IMAP family member 6
	ENSMUSG00000047888	-0.600451	0.0442	Tnrc6b	trinucleotide repeat containing 6b
	ENSMUSG00000048007	-1.72456	0.0044	Timm8a1	translocase of inner mitochondrial membrane 8A1
	ENSMUSG00000048087	-0.939479	0.00415	Gm4737	predicted gene 4737
	ENSMUSG00000048489	-1.2005	0.0025	8430408G22Rik	RIKEN cDNA 8430408G22 gene
	ENSMUSG00000048772	-0.890739	0.0392	Tmem53	transmembrane protein 53
	ENSMUSG00000048826	-1.31828	0.0034	Dact2	dishevelled-binding antagonist of beta-catenin 2
	ENSMUSG00000048833	-1.1113	0.0119	Slc39a9	solute carrier family 39 (zinc transporter), member 9
	ENSMUSG00000048856	-1.6615	5e-05	Slc25a47	solute carrier family 25, member 47
	ENSMUSG00000049090	-0.699032	0.03835	Zadh2	zinc binding alcohol dehydrogenase, domain containing 2
	ENSMUSG00000049299	-1.28245	0.0055	Trappc1	trafficking protein particle complex 1
	ENSMUSG00000049327	-0.873705	0.04735	Setd8
	ENSMUSG00000049339	-0.885196	0.0079	Fam134a	family with sequence similarity 134, member A
	ENSMUSG00000049517	-1.36255	0.00135	Rps23	ribosomal protein S23
	ENSMUSG00000049760	-0.75212	0.0369	2410015M20Rik	RIKEN cDNA 2410015M20 gene
	ENSMUSG00000049971	-0.934335	0.013	Glt1d1	glycosyltransferase 1 domain containing 1
	ENSMUSG00000050440	-1.15836	0.0017	Hamp	hepcidin antimicrobial peptide
	ENSMUSG00000050445	-1.64697	5e-05	Cyp8b1	cytochrome P450, family 8, subfamily b, polypeptide 1
	ENSMUSG00000050708	-0.901773	0.0089	Ftl1	ferritin light polypeptide 1
	ENSMUSG00000050732	-0.947358	0.00745	Vamp8	vesicle-associated membrane protein 8
	ENSMUSG00000050777	-1.45142	0.0012	Tmem37	transmembrane protein 37
	ENSMUSG00000051339	-0.830621	0.01275	2900026A02Rik	RIKEN cDNA 2900026A02 gene
	ENSMUSG00000051375	-0.803438	0.01505	Pcdh1	protocadherin 1
	ENSMUSG00000051652	-0.709298	0.04045	Lrrc3	leucine rich repeat containing 3
	ENSMUSG00000051748	-0.946805	0.00225	1100001G20Rik
	ENSMUSG00000052151	-1.62361	0.00325	Ppap2c
	ENSMUSG00000052310	-1.08763	0.00305	Slc39a1	solute carrier family 39 (zinc transporter), member 1
	ENSMUSG00000052395	-1.21679	0.00455	Rft1	RFT1 homolog
	ENSMUSG00000052407	-0.812528	0.02815	Ccdc171	coiled-coil domain containing 171
	ENSMUSG00000052738	-0.878377	0.02025	Suclg1	succinate-CoA ligase, GDP-forming, alpha subunit
	ENSMUSG00000053219	-2.21773	0.01465	Raet1e	retinoic acid early transcript 1E
	ENSMUSG00000053453	-1.01571	0.02675	Thoc7	THO complex 7
	ENSMUSG00000053560	-0.844685	0.0299	Ier2	immediate early response 2
	ENSMUSG00000053565	-1.05807	0.00415	Eif3k	eukaryotic translation initiation factor 3, subunit K
	ENSMUSG00000053617	-0.707483	0.02805	Sh3pxd2a	SH3 and PX domains 2A
	ENSMUSG00000053641	-1.11709	0.00045	Dennd4a	DENN/MADD domain containing 4A
	ENSMUSG00000053644	-0.878641	0.01935	Aldh7a1	aldehyde dehydrogenase family 7, member A1
	ENSMUSG00000053646	-0.658941	0.0297	Plxnb1	plexin B1
	ENSMUSG00000053964	-0.663825	0.03775	Lgals4	lectin, galactose binding, soluble 4
	ENSMUSG00000054008	-0.713572	0.02325	Ndst1	N-deacetylase/N-sulfotransferase (heparan glucosaminyl) 1
	ENSMUSG00000054150	-0.859296	0.0119	Syne3	spectrin repeat containing, nuclear envelope family member 3
	ENSMUSG00000054474	-1.30166	0.0249	Thnsl2	threonine synthase-like 2 (bacterial)
	ENSMUSG00000054509	-0.898988	0.02285	Parp4	poly (ADP-ribose) polymerase family, member 4
	ENSMUSG00000054855	-1.15494	0.0101	Rnd1	Rho family GTPase 1
	ENSMUSG00000054889	-1.17163	0.0097	Dsp	desmoplakin
	ENSMUSG00000055041	-1.26455	0.02575	Commd5	COMM domain containing 5
	ENSMUSG00000055730	-1.095	0.0022	Ces2a	carboxylesterase 2A
	ENSMUSG00000056035	-1.67017	5e-05	Cyp3a11	cytochrome P450, family 3, subfamily a, polypeptide 11
	ENSMUSG00000056429	-0.69274	0.0283	Tgoln1	trans-golgi network protein
	ENSMUSG00000056666	-1.46392	0.0001	Retsat	retinol saturase (all trans retinol 13,14 reductase)
	ENSMUSG00000056692	-1.02396	0.0215	D17Wsu92e	DNA segment, Chr 17, Wayne State University 92, expressed
	ENSMUSG00000056770	-0.997461	0.00675	Setd3	SET domain containing 3
	ENSMUSG00000056952	-0.82451	0.01005	Tatdn2	TatD DNase domain containing 2
	ENSMUSG00000057054	-1.10734	0.0023	Inca1	inhibitor of CDK, cyclin A1 interacting protein 1
	ENSMUSG00000057113	-0.94165	0.0173	Npm1	nucleophosmin 1
	ENSMUSG00000057228	-1.16876	0.00125	Aadat	aminoadipate aminotransferase
	ENSMUSG00000057411	-1.05948	0.0277	Fam173a	family with sequence similarity 173, member A
	ENSMUSG00000057425	-2.21807	0.00015	Ugt2b37	UDP glucuronosyltransferase 2 family, polypeptide B37
	ENSMUSG00000057465	-5.23058	5e-05	Saa2	serum amyloid A 2
	ENSMUSG00000057522	-1.00745	0.0174	Spop	speckle-type POZ protein
	ENSMUSG00000057841	-0.845232	0.0376	Rpl32	ribosomal protein L32
	ENSMUSG00000057880	-0.971116	0.02845	Abat	4-aminobutyrate aminotransferase
	ENSMUSG00000058230	-0.745042	0.03165	Grlf1
	ENSMUSG00000058672	-1.31501	0.00035	Tubb2a	tubulin, beta 2A class IIA
	ENSMUSG00000059263	-0.727277	0.0205	Usp47	ubiquitin specific peptidase 47
	ENSMUSG00000059291	-1.00927	0.00575	Rpl11	ribosomal protein L11
	ENSMUSG00000059534	-0.740979	0.0377	Uqcr10	ubiquinol-cytochrome c reductase, complex III subunit X
	ENSMUSG00000059995	-0.740886	0.02405	Atxn7l3	ataxin 7-like 3
	ENSMUSG00000060036	-0.709771	0.036	Rpl3	ribosomal protein L3
	ENSMUSG00000060126	-1.21722	0.00845	Tpt1	tumor protein, translationally-controlled 1
	ENSMUSG00000060261	-0.613365	0.0371	Gtf2i	general transcription factor II I
	ENSMUSG00000060371	-0.958379	0.0312	Caln1	calneuron 1
	ENSMUSG00000060519	-1.67366	0.0052	Tor3a	torsin family 3, member A
	ENSMUSG00000060803	-1.98865	5e-05	Gstp1	glutathione S-transferase, pi 1
	ENSMUSG00000060938	-0.87065	0.0199	Rpl26	ribosomal protein L26
	ENSMUSG00000061130	-1.03719	0.0054	Ppm1b	protein phosphatase 1B, magnesium dependent, beta isoform
	ENSMUSG00000061292	-0.739057	0.0251	Cyp3a59	cytochrome P450, family 3, subfamily a, polypeptide 59
	ENSMUSG00000061313	-1.75111	5e-05	Ddhd2	DDHD domain containing 2
	ENSMUSG00000061477	-1.14844	0.0035	Rps7	ribosomal protein S7
	ENSMUSG00000061607	-0.91165	0.0415	Mdc1	mediator of DNA damage checkpoint 1
	ENSMUSG00000061906	-0.657862	0.0475	Ugt2b38	UDP glucuronosyltransferase 2 family, polypeptide B38
	ENSMUSG00000061981	-0.887749	0.01275	Flot2	flotillin 2
	ENSMUSG00000062070	-0.718113	0.0195	Pgk1	phosphoglycerate kinase 1
	ENSMUSG00000062234	-0.736931	0.02035	Gak	cyclin G associated kinase
	ENSMUSG00000062270	-0.997941	0.00625	Morf4l1	mortality factor 4 like 1
	ENSMUSG00000062545	-1.38227	0.0053	Tlr12	toll-like receptor 12
	ENSMUSG00000062997	-0.780714	0.032	Rpl35	ribosomal protein L35
	ENSMUSG00000063065	-1.06773	0.00865	Mapk3	mitogen-activated protein kinase 3
	ENSMUSG00000063077	-0.797817	0.02405	Kif1b	kinesin family member 1B
	ENSMUSG00000063354	-1.36649	0.00105	Slc39a4	solute carrier family 39 (zinc transporter), member 4
	ENSMUSG00000063856	-0.744318	0.02405	Gpx1	glutathione peroxidase 1
	ENSMUSG00000063904	-0.856039	0.00755	Dpp3	dipeptidylpeptidase 3
	ENSMUSG00000063929	-1.29234	0.0008	Cyp4a32	cytochrome P450, family 4, subfamily a, polypeptide 32
	ENSMUSG00000063931	-0.747625	0.023	Pepd	peptidase D
	ENSMUSG00000064145	-0.74736	0.0434	Arih2	ariadne RBR E3 ubiquitin protein ligase 2
	ENSMUSG00000064254	-1.05926	0.0209	Ethe1	ethylmalonic encephalopathy 1
	ENSMUSG00000064294	-0.931077	0.01115	Aox3	aldehyde oxidase 3
	ENSMUSG00000066071	-2.19583	5e-05	Cyp4a12a	cytochrome P450, family 4, subfamily a, polypeptide 12a
	ENSMUSG00000066072	-1.31954	0.00085	Cyp4a10	cytochrome P450, family 4, subfamily a, polypeptide 10
	ENSMUSG00000066366	-0.700701	0.04775	Serpina1a	serine (or cysteine) peptidase inhibitor, clade A, member 1A
	ENSMUSG00000066407	-0.96674	0.0345	Gm10263	40S ribosomal protein S28 pseudogene
	ENSMUSG00000066735	-0.940344	0.0201	Vkorc1l1	vitamin K epoxide reductase complex, subunit 1-like 1
	ENSMUSG00000067235	-0.811202	0.0377	H2-Q10	histocompatibility 2, Q region locus 10
	ENSMUSG00000067274	-1.13612	0.00285	Rplp0	ribosomal protein, large, P0
	ENSMUSG00000067567	-1.33022	0.01845	Hdac8	histone deacetylase 8
	ENSMUSG00000067713	-0.858441	0.017	Prkag1	protein kinase, AMP-activated, gamma 1 non-catalytic subunit
	ENSMUSG00000067736	-1.56822	0.013	Gm10222	predicted gene 10222
	ENSMUSG00000067787	-2.30406	0.00865	Blcap	bladder cancer associated protein
	ENSMUSG00000067889	-1.15267	0.005	Sptbn2	spectrin beta, non-erythrocytic 2
	ENSMUSG00000068086	-1.58189	0.00065	Cyp2d9	cytochrome P450, family 2, subfamily d, polypeptide 9
	ENSMUSG00000068551	-1.55173	0.0042	Zfp467	zinc finger protein 467
	ENSMUSG00000068732	-0.81285	0.03805	Tmem167b	transmembrane protein 167B
	ENSMUSG00000068749	-1.77956	0.03245	Psma5	proteasome (prosome, macropain) subunit, alpha type 5
	ENSMUSG00000068823	-0.7689	0.0171	Csde1	cold shock domain containing E1, RNA binding
	ENSMUSG00000068876	-0.874445	0.00745	Cgn	cingulin
	ENSMUSG00000069306	-2.33388	0.0166	Hist1h4m	histone cluster 1, H4m
	ENSMUSG00000069324	-1.46415	5e-05	Gm5096	betaine-homocysteine methyltransferase pseudogene
	ENSMUSG00000069516	-1.27964	0.00175	Lyz2	lysozyme 2
	ENSMUSG00000069682	-1.55825	0.00135	Gm10275	Rpl12 pseudogene
	ENSMUSG00000069744	-0.852699	0.01805	Psmb3	proteasome (prosome, macropain) subunit, beta type 3
	ENSMUSG00000069805	-0.675613	0.04205	Fbp1	fructose bisphosphatase 1
	ENSMUSG00000070426	-1.32792	0.0032	Rnf121	ring finger protein 121
	ENSMUSG00000070644	-1.03237	0.0041	Etnk2	ethanolamine kinase 2
	ENSMUSG00000070939	-0.777666	0.02125	Tgfbrap1	transforming growth factor, beta receptor associated protein 1
	ENSMUSG00000070953	-1.16459	0.0497	Rabepk	Rab9 effector protein with kelch motifs
	ENSMUSG00000071528	-1.47363	0.01205	Usmg5	upregulated during skeletal muscle growth 5
	ENSMUSG00000071647	-0.696982	0.02995	Eml3	echinoderm microtubule associated protein like 3
	ENSMUSG00000071655	-1.00758	0.00195	Ubxn1	UBX domain protein 1
	ENSMUSG00000071866	-1.19758	0.0005	Ppia	peptidylprolyl isomerase A
	ENSMUSG00000072849	-2.76971	5e-05	Serpina1e	serine (or cysteine) peptidase inhibitor, clade A, member 1E
	ENSMUSG00000073424	-0.841477	0.0157	Cyp4f15	cytochrome P450, family 4, subfamily f, polypeptide 15
	ENSMUSG00000073725	-0.718901	0.0264	Lmbrd1	LMBR1 domain containing 1
	ENSMUSG00000073830	-2.53057	5e-05	Mup14	major urinary protein 14
	ENSMUSG00000073834	-4.1729	0.0005	Mup11	major urinary protein 11
	ENSMUSG00000073842	-2.59435	5e-05	Mup7	major urinary protein 7
	ENSMUSG00000073889	-1.43668	0.0289	Il11ra1	interleukin 11 receptor, alpha chain 1
	ENSMUSG00000073940	-1.12014	0.02335	Hbb-bt	hemoglobin, beta adult t chain
	ENSMUSG00000074063	-1.32248	5e-05	Osgin1	oxidative stress induced growth inhibitor 1
	ENSMUSG00000074064	-0.71407	0.03675	Mlycd	malonyl-CoA decarboxylase
	ENSMUSG00000074115	-3.56709	5e-05	Saa1	serum amyloid A 1
	ENSMUSG00000074129	-1.0595	0.01535	Rpl13a	ribosomal protein L13A
	ENSMUSG00000074227	-1.33315	0.0077	Spint2	serine protease inhibitor, Kunitz type 2
	ENSMUSG00000074240	-2.78242	0.0161	Cib3	calcium and integrin binding family member 3
	ENSMUSG00000074277	-0.804404	0.0423	Phldb3	pleckstrin homology like domain, family B, member 3
	ENSMUSG00000074336	-0.825109	0.02475	Apoc4	apolipoprotein C-IV
	ENSMUSG00000074768	-1.38761	0.00255	Bhmt	betaine-homocysteine methyltransferase
	ENSMUSG00000075053	-1.08007	0.00895	Vdac3-ps1	voltage-dependent anion channel 3, pseudogene 1
	ENSMUSG00000076441	-1.24312	0.0027	Ass1	argininosuccinate synthetase 1
	ENSMUSG00000078429	-0.938973	0.00605	Ctdsp2	CTD (carboxy-terminal domain, RNA polymerase II, polypeptide A) small phosphatase 2
	ENSMUSG00000078597	-3.70668	5e-05	Cyp4a12b	cytochrome P450, family 4, subfamily a, polypeptide 12B
	ENSMUSG00000078612	-1.01605	0.0112	1700024P16Rik	RIKEN cDNA 1700024P16 gene
	ENSMUSG00000078650	-1.68892	5e-05	G6pc	glucose-6-phosphatase, catalytic
	ENSMUSG00000078674	-1.14093	0.0128	Mup18	major urinary protein 18
	ENSMUSG00000078675	-4.89869	5e-05	Mup16	major urinary protein 16
	ENSMUSG00000078683	-2.63449	0.00935	Mup1	major urinary protein 1
	ENSMUSG00000078689	-2.67347	5e-05	Mup6	major urinary protein 6
	ENSMUSG00000078695	-0.847069	0.0146	Cisd3	CDGSH iron sulfur domain 3
	ENSMUSG00000078812	-1.07685	0.0035	Eif5a	eukaryotic translation initiation factor 5A
	ENSMUSG00000079435	-1.07117	0.0136	Rpl36a	ribosomal protein L36A
	ENSMUSG00000079563	-1.03447	0.00215	Pglyrp2	peptidoglycan recognition protein 2
	ENSMUSG00000080316	-1.51823	0.00395	4930546H06Rik
	ENSMUSG00000086784	-0.871975	0.00675	Isoc2a	isochorismatase domain containing 2a
	ENSMUSG00000089873	-6.19548	0.0007	Mup13	major urinary protein 13
	ENSMUSG00000090150	-0.921344	0.0084	Acad11	acyl-Coenzyme A dehydrogenase family, member 11
	ENSMUSG00000090841	-0.794935	0.01285	Myl6	myosin, light polypeptide 6, alkali, smooth muscle and non-muscle
	ENSMUSG00000091586	-1.29939	0.00025	Cyp4f17	cytochrome P450, family 4, subfamily f, polypeptide 17
	ENSMUSG00000094475	-6.74575	0.0291	Gm11007	zinc finger protein 709-like
	ENSMUSG00000094793	-5.25078	5e-05	Mup12	major urinary protein 12
	ENSMUSG00000094806	-0.725817	0.0284	Cyp2d10	cytochrome P450, family 2, subfamily d, polypeptide 10
	ENSMUSG00000096062	-1.00568	0.00745	Pik3c2g	phosphatidylinositol 3-kinase, C2 domain containing, gamma polypeptide
	ENSMUSG00000096188	-1.09195	0.0037	Cmtm4	CKLF-like MARVEL transmembrane domain containing 4
	ENSMUSG00000096674	-5.68025	5e-05	Mup15	major urinary protein 15
	ENSMUSG00000096688	-5.4943	5e-05	Mup17	major urinary protein 17
the result of log2 (Ratio) is positive represent up-regulated and the result of log2 (Ratio) is negative represent up-regulated

## Sheet: M vs K
		log2 (Ratio)	Adjusted P-value (Differentially expressed)	Annotation
	ID	kaempferol/model	kaempferol/model	Gene_symbol	Description
M VS K	ENSMUSG00000000171	0.788019	0.0148	Sdhd	succinate dehydrogenase complex, subunit D, integral membrane protein
	ENSMUSG00000000282	1.25673	0.0417	Mnt	max binding protein
	ENSMUSG00000000301	0.623465	0.03615	Pemt	phosphatidylethanolamine N-methyltransferase
	ENSMUSG00000000340	0.698939	0.0396	Dbt	dihydrolipoamide branched chain transacylase E2
	ENSMUSG00000000374	0.643845	0.04	Trappc10	trafficking protein particle complex 10
	ENSMUSG00000000399	0.735091	0.0459	Ndufa9	NADH dehydrogenase (ubiquinone) 1 alpha subcomplex, 9
	ENSMUSG00000000594	0.790561	0.01865	Gm2a	GM2 ganglioside activator protein
	ENSMUSG00000000605	0.788166	0.01355	Clcn4-2
	ENSMUSG00000000673	0.634172	0.04615	Haao	3-hydroxyanthranilate 3,4-dioxygenase
	ENSMUSG00000000711	0.974851	0.01745	Rab5b	RAB5B, member RAS oncogene family
	ENSMUSG00000001100	0.773934	0.04445	Poldip2	polymerase (DNA-directed), delta interacting protein 2
	ENSMUSG00000001280	0.957014	0.0165	Sp1	trans-acting transcription factor 1
	ENSMUSG00000001525	1.32401	0.00015	Tubb5	tubulin, beta 5 class I
	ENSMUSG00000001552	0.719484	0.0487	Jup	junction plakoglobin
	ENSMUSG00000001855	0.834617	0.0212	Nup214	nucleoporin 214
	ENSMUSG00000002222	0.70984	0.02665	Rmnd5a	required for meiotic nuclear division 5 homolog A
	ENSMUSG00000002265	1.24824	0.0035	Peg3	paternally expressed 3
	ENSMUSG00000002289	0.97571	0.0047	Angptl4	angiopoietin-like 4
	ENSMUSG00000002332	0.929079	0.0054	Dhrs1	dehydrogenase/reductase (SDR family) member 1
	ENSMUSG00000002346	0.798513	0.02295	Slc25a42	solute carrier family 25, member 42
	ENSMUSG00000002379	0.76907	0.0441	Ndufa11	NADH dehydrogenase (ubiquinone) 1 alpha subcomplex 11
	ENSMUSG00000002395	0.829706	0.03525	Use1	unconventional SNARE in the ER 1 homolog (S. cerevisiae)
	ENSMUSG00000002504	0.814123	0.03775	Slc9a3r2	solute carrier family 9 (sodium/hydrogen exchanger), member 3 regulator 2
	ENSMUSG00000002524	0.67741	0.04615	Puf60	poly-U binding splicing factor 60
	ENSMUSG00000003429	0.961954	0.00725	Rps11	ribosomal protein S11
	ENSMUSG00000003970	0.683804	0.0397	Rpl8	ribosomal protein L8
	ENSMUSG00000004056	0.766823	0.0439	Akt2	thymoma viral proto-oncogene 2
	ENSMUSG00000004105	1.18127	0.04225	Angptl2	angiopoietin-like 2
	ENSMUSG00000004270	1.19376	0.0217	Lpcat3	lysophosphatidylcholine acyltransferase 3
	ENSMUSG00000004319	0.765166	0.0373	Clcn3	chloride channel, voltage-sensitive 3
	ENSMUSG00000004562	0.87431	0.01865	Arhgef40	Rho guanine nucleotide exchange factor (GEF) 40
	ENSMUSG00000004655	0.806982	0.01795	Aqp1	aquaporin 1
	ENSMUSG00000004748	0.87401	0.0363	Mtfp1	mitochondrial fission process 1
	ENSMUSG00000004880	0.94451	0.01825	Lbr	lamin B receptor
	ENSMUSG00000004947	0.924357	0.04695	Dtx2	deltex 2, E3 ubiquitin ligase
	ENSMUSG00000005034	1.10893	0.037	Prkacb	protein kinase, cAMP dependent, catalytic, beta
	ENSMUSG00000005198	0.755458	0.02985	Polr2a	polymerase (RNA) II (DNA directed) polypeptide A
	ENSMUSG00000005683	0.686349	0.03915	Cs	citrate synthase
	ENSMUSG00000005893	0.852754	0.0459	Nr2c2	nuclear receptor subfamily 2, group C, member 2
	ENSMUSG00000005949	0.773699	0.0484	Ctns	cystinosis, nephropathic
	ENSMUSG00000005982	1.12838	0.02195	Naa60	N(alpha)-acetyltransferase 60, NatF catalytic subunit
	ENSMUSG00000006021	1.34925	0.0027	Kptn	kaptin
	ENSMUSG00000006299	0.699597	0.0316	Aamp	angio-associated migratory protein
	ENSMUSG00000006378	0.966568	0.0191	Gcat	glycine C-acetyltransferase (2-amino-3-ketobutyrate-coenzyme A ligase)
	ENSMUSG00000006418	0.859452	0.03775	Rnf114	ring finger protein 114
	ENSMUSG00000006445	1.26889	0.0454	Epha2	Eph receptor A2
	ENSMUSG00000006736	1.02394	0.0151	Tspan31	tetraspanin 31
	ENSMUSG00000007458	0.848512	0.02815	M6pr	mannose-6-phosphate receptor, cation dependent
	ENSMUSG00000007892	0.805948	0.0247	Rplp1	ribosomal protein, large, P1
	ENSMUSG00000008393	0.805602	0.0196	Carhsp1	calcium regulated heat stable protein 1
	ENSMUSG00000008604	0.819954	0.0094	Ubqln4	ubiquilin 4
	ENSMUSG00000008855	1.02323	0.00325	Hdac5	histone deacetylase 5
	ENSMUSG00000008892	1.0286	0.00775	Vdac3	voltage-dependent anion channel 3
	ENSMUSG00000009112	0.856777	0.0376	Bcl2l13	BCL2-like 13 (apoptosis facilitator)
	ENSMUSG00000009378	0.743822	0.0141	Slc16a12	solute carrier family 16 (monocarboxylic acid transporters), member 12
	ENSMUSG00000009549	1.19712	0.00365	Srp14	signal recognition particle 14
	ENSMUSG00000009633	1.01103	0.00265	G0s2	G0/G1 switch gene 2
	ENSMUSG00000009647	1.08352	0.01485	Mcu	mitochondrial calcium uniporter
	ENSMUSG00000010047	0.91006	0.0102	Hyal2	hyaluronoglucosaminidase 2
	ENSMUSG00000010376	1.03676	0.0492	Nedd8	neural precursor cell expressed, developmentally down-regulated gene 8
	ENSMUSG00000012848	0.854344	0.01855	Rps5	ribosomal protein S5
	ENSMUSG00000014164	0.835433	0.0306	Klhl3	kelch-like 3
	ENSMUSG00000014349	0.772688	0.03495	Ube2z	ubiquitin-conjugating enzyme E2Z
	ENSMUSG00000014402	0.955006	0.00865	Tsg101	tumor susceptibility gene 101
	ENSMUSG00000014769	0.72146	0.04875	Psmb1	proteasome (prosome, macropain) subunit, beta type 1
	ENSMUSG00000015094	1.13368	0.0183	Npdc1	neural proliferation, differentiation and control 1
	ENSMUSG00000015341	1.14659	0.0019	Golga7	golgi autoantigen, golgin subfamily a, 7
	ENSMUSG00000016256	0.887762	0.02655	Ctsz	cathepsin Z
	ENSMUSG00000016541	0.801821	0.0283	Atxn10	ataxin 10
	ENSMUSG00000016756	0.988788	0.0334	Cmah	cytidine monophospho-N-acetylneuraminic acid hydroxylase
	ENSMUSG00000017386	0.872446	0.0182	Traf4	TNF receptor associated factor 4
	ENSMUSG00000017405	1.10813	0.0082	Nek8	NIMA (never in mitosis gene a)-related expressed kinase 8
	ENSMUSG00000017718	1.03245	0.03045	Afmid	arylformamidase
	ENSMUSG00000017978	0.674438	0.04915	Cadps2	Ca2+-dependent activator protein for secretion 2
	ENSMUSG00000018102	1.16334	0.00045	Hist1h2bc	histone cluster 1, H2bc
	ENSMUSG00000018166	0.88172	0.00725	Erbb3	erb-b2 receptor tyrosine kinase 3
	ENSMUSG00000018286	0.660826	0.0446	Psmb6	proteasome (prosome, macropain) subunit, beta type 6
	ENSMUSG00000018339	2.03671	0.00075	Gpx3	glutathione peroxidase 3
	ENSMUSG00000018537	0.799565	0.03765	Pcgf2	polycomb group ring finger 2
	ENSMUSG00000018677	0.642246	0.03935	Slc25a39	solute carrier family 25, member 39
	ENSMUSG00000019312	0.913474	0.01615	Grb7	growth factor receptor bound protein 7
	ENSMUSG00000019777	1.1218	0.0355	Hdac2	histone deacetylase 2
	ENSMUSG00000019818	0.614826	0.03235	Cd164	CD164 antigen
	ENSMUSG00000019849	1.09403	0.00415	Prep	prolyl endopeptidase
	ENSMUSG00000019935	1.52164	0.00055	Slc17a8	solute carrier family 17 (sodium-dependent inorganic phosphate cotransporter), member 8
	ENSMUSG00000019948	0.81484	0.04735	Actr6	ARP6 actin-related protein 6
	ENSMUSG00000019989	1.00279	0.0017	Enpp3	ectonucleotide pyrophosphatase/phosphodiesterase 3
	ENSMUSG00000020017	0.833194	0.01785	Hal	histidine ammonia lyase
	ENSMUSG00000020034	0.93246	0.03905	Tcp11l2	t-complex 11 (mouse) like 2
	ENSMUSG00000020089	0.709516	0.02475	Ppa1	pyrophosphatase (inorganic) 1
	ENSMUSG00000020091	0.729853	0.0289	Eif4ebp2	eukaryotic translation initiation factor 4E binding protein 2
	ENSMUSG00000020092	1.18322	0.00275	Pald1	phosphatase domain containing, paladin 1
	ENSMUSG00000020122	1.29265	0.0122	Egfr	epidermal growth factor receptor
	ENSMUSG00000020190	0.682898	0.03135	Mknk2	MAP kinase-interacting serine/threonine kinase 2
	ENSMUSG00000020219	0.90545	0.0403	Timm13	translocase of inner mitochondrial membrane 13
	ENSMUSG00000020224	1.52488	0.0081	Llph	LLP homolog, long-term synaptic facilitation (Aplysia)
	ENSMUSG00000020257	0.720634	0.04225	Wdr82	WD repeat domain containing 82
	ENSMUSG00000020262	1.11611	0.008	Adarb1	adenosine deaminase, RNA-specific, B1
	ENSMUSG00000020402	0.698577	0.037	Vdac1	voltage-dependent anion channel 1
	ENSMUSG00000020453	1.02156	0.01725	Patz1	POZ (BTB) and AT hook containing zinc finger 1
	ENSMUSG00000020483	0.732276	0.04525	Dynll2	dynein light chain LC8-type 2
	ENSMUSG00000020570	0.878431	0.01395	Sypl	synaptophysin-like protein
	ENSMUSG00000020653	1.85853	0.00075	Klf11	Kruppel-like factor 11
	ENSMUSG00000020718	1.92539	0.00055	Polg2	polymerase (DNA directed), gamma 2, accessory subunit
	ENSMUSG00000020733	0.642364	0.0422	Slc9a3r1	solute carrier family 9 (sodium/hydrogen exchanger), member 3 regulator 1
	ENSMUSG00000020777	0.884128	0.03165	Acox1	acyl-Coenzyme A oxidase 1, palmitoyl
	ENSMUSG00000020810	1.08132	0.02045	Cygb	cytoglobin
	ENSMUSG00000020829	1.33523	0.02535	Slc46a1	solute carrier family 46, member 1
	ENSMUSG00000020832	1.01728	0.04275	Eral1	Era (G-protein)-like 1 (E. coli)
	ENSMUSG00000020877	0.864764	0.03685	Scrn2	secernin 2
	ENSMUSG00000020889	0.933734	0.00625	Nr1d1	nuclear receptor subfamily 1, group D, member 1
	ENSMUSG00000020988	0.797591	0.0286	L2hgdh	L-2-hydroxyglutarate dehydrogenase
	ENSMUSG00000021069	1.01959	0.0019	Pygl	liver glycogen phosphorylase
	ENSMUSG00000021109	0.860674	0.0302	Hif1a	hypoxia inducible factor 1, alpha subunit
	ENSMUSG00000021190	0.77496	0.0255	Lgmn	legumain
	ENSMUSG00000021210	0.781064	0.0394	Akr1c6	aldo-keto reductase family 1, member C6
	ENSMUSG00000021290	0.8821	0.02925	2010107E04Rik	RIKEN cDNA 2010107E04 gene
	ENSMUSG00000021311	0.778698	0.03845	Mtr	5-methyltetrahydrofolate-homocysteine methyltransferase
	ENSMUSG00000021338	0.966636	0.02085	Lrrc16a	leucine rich repeat containing 16A
	ENSMUSG00000021340	0.673423	0.04655	Gpld1	glycosylphosphatidylinositol specific phospholipase D1
	ENSMUSG00000021364	0.761534	0.03575	Elovl2	elongation of very long chain fatty acids (FEN1/Elo2, SUR4/Elo3, yeast)-like 2
	ENSMUSG00000021411	0.806463	0.04485	Pxdc1	PX domain containing 1
	ENSMUSG00000021427	0.589806	0.0496	Ssr1	signal sequence receptor, alpha
	ENSMUSG00000021460	0.726034	0.04135	Auh	AU RNA binding protein/enoyl-coenzyme A hydratase
	ENSMUSG00000021468	0.849712	0.045	Sptlc1	serine palmitoyltransferase, long chain base subunit 1
	ENSMUSG00000021476	0.752995	0.0283	Habp4	hyaluronic acid binding protein 4
	ENSMUSG00000021486	1.09452	0.0028	Prelid1	PRELI domain containing 1
	ENSMUSG00000021497	0.750723	0.03795	Txndc15	thioredoxin domain containing 15
	ENSMUSG00000021549	0.965524	0.0305	Rasa1	RAS p21 protein activator 1
	ENSMUSG00000021638	1.46248	0.0209	Ocln	occludin
	ENSMUSG00000021748	0.683421	0.0458	Pdhb	pyruvate dehydrogenase (lipoamide) beta
	ENSMUSG00000021756	0.709773	0.0436	Il6st	interleukin 6 signal transducer
	ENSMUSG00000021779	0.79136	0.0165	Thrb	thyroid hormone receptor beta
	ENSMUSG00000021782	1.19933	0.0312	Dlg5	discs, large homolog 5 (Drosophila)
	ENSMUSG00000021816	0.925168	0.04575	Ppp3cb	protein phosphatase 3, catalytic subunit, beta isoform
	ENSMUSG00000021890	0.772782	0.0443	Eaf1	ELL associated factor 1
	ENSMUSG00000021918	0.80992	0.0313	Nek4	NIMA (never in mitosis gene a)-related expressed kinase 4
	ENSMUSG00000021936	0.998628	0.04605	Mapk8	mitogen-activated protein kinase 8
	ENSMUSG00000021944	0.901274	0.0206	Gata4	GATA binding protein 4
	ENSMUSG00000021978	0.801892	0.01925	Extl3	exostoses (multiple)-like 3
	ENSMUSG00000021999	0.618973	0.0471	Cpb2	carboxypeptidase B2 (plasma)
	ENSMUSG00000022032	3.3349	0.008	Scara5	scavenger receptor class A, member 5
	ENSMUSG00000022040	0.889927	0.0187	Ephx2	epoxide hydrolase 2, cytoplasmic
	ENSMUSG00000022142	0.847709	0.0108	Nup155	nucleoporin 155
	ENSMUSG00000022149	0.7413	0.0419	C9	complement component 9
	ENSMUSG00000022181	1.40272	0.0022	C6	complement component 6
	ENSMUSG00000022184	1.38963	0.0366	Fbxo4	F-box protein 4
	ENSMUSG00000022193	0.844302	0.02355	Psmb5	proteasome (prosome, macropain) subunit, beta type 5
	ENSMUSG00000022210	0.674379	0.04435	Dhrs4	dehydrogenase/reductase (SDR family) member 4
	ENSMUSG00000022283	0.910253	0.00425	Pabpc1	poly(A) binding protein, cytoplasmic 1
	ENSMUSG00000022383	0.683099	0.03545	Ppara	peroxisome proliferator activated receptor alpha
	ENSMUSG00000022400	0.998385	0.0382	Rbx1	ring-box 1
	ENSMUSG00000022500	1.08622	0.04605	Litaf	LPS-induced TN factor
	ENSMUSG00000022508	2.11199	5e-05	Bcl6	B cell leukemia/lymphoma 6
	ENSMUSG00000022551	0.691818	0.0351	Cyc1	cytochrome c-1
	ENSMUSG00000022564	0.705732	0.02565	Grina	glutamate receptor, ionotropic, N-methyl D-aspartate-associated protein 1 (glutamate binding)
	ENSMUSG00000022723	1.20122	0.02955	Crybg3	beta-gamma crystallin domain containing 3
	ENSMUSG00000022781	0.69427	0.04645	Pak2	p21 protein (Cdc42/Rac)-activated kinase 2
	ENSMUSG00000022814	0.972552	0.0114	Umps	uridine monophosphate synthetase
	ENSMUSG00000022822	1.17499	0.04865	Abcc5	ATP-binding cassette, sub-family C (CFTR/MRP), member 5
	ENSMUSG00000022848	0.976531	0.04735	Dirc2	disrupted in renal carcinoma 2 (human)
	ENSMUSG00000023019	0.818657	0.0393	Gpd1	glycerol-3-phosphate dehydrogenase 1 (soluble)
	ENSMUSG00000023044	1.59203	5e-05	Csad	cysteine sulfinic acid decarboxylase
	ENSMUSG00000023055	0.777345	0.02585	Calcoco1	calcium binding and coiled coil domain 1
	ENSMUSG00000023176	0.706677	0.0343	Cpn2	carboxypeptidase N, polypeptide 2
	ENSMUSG00000023243	0.70886	0.03495	Kcnk5	potassium channel, subfamily K, member 5
	ENSMUSG00000023262	0.888104	0.01275	Acy1	aminoacylase 1
	ENSMUSG00000023832	0.929334	0.0237	Acat2	acetyl-Coenzyme A acetyltransferase 2
	ENSMUSG00000023845	0.732942	0.0223	Lnpep	leucyl/cystinyl aminopeptidase
	ENSMUSG00000023846	0.777354	0.01815	Riok2	RIO kinase 2 (yeast)
	ENSMUSG00000023921	0.643394	0.04145	Mut	methylmalonyl-Coenzyme A mutase
	ENSMUSG00000023942	0.672809	0.04475	Slc29a1	solute carrier family 29 (nucleoside transporters), member 1
	ENSMUSG00000024014	0.789631	0.04315	Pim1	proviral integration site 1
	ENSMUSG00000024042	0.788661	0.02355	Sik1	salt inducible kinase 1
	ENSMUSG00000024065	0.899999	0.00625	Ehd3	EH-domain containing 3
	ENSMUSG00000024068	0.714985	0.0437	Spast	spastin
	ENSMUSG00000024070	0.940903	0.04185	Prkd3	protein kinase D3
	ENSMUSG00000024084	1.08501	0.02865	Qpct	glutaminyl-peptide cyclotransferase (glutaminyl cyclase)
	ENSMUSG00000024131	0.880787	0.0198	Slc3a1	solute carrier family 3, member 1
	ENSMUSG00000024151	1.80493	0.04365	Msh2	mutS homolog 2
	ENSMUSG00000024180	0.821292	0.0317	Tmem8	transmembrane protein 8 (five membrane-spanning domains)
	ENSMUSG00000024220	1.20477	0.03755	Zfp523	zinc finger protein 523
	ENSMUSG00000024241	0.640319	0.0357	Sos1	son of sevenless homolog 1 (Drosophila)
	ENSMUSG00000024248	0.976215	0.00875	Cox7a2l	cytochrome c oxidase subunit VIIa polypeptide 2-like
	ENSMUSG00000024331	0.743321	0.02165	Dsc2	desmocollin 2
	ENSMUSG00000024357	0.6598	0.0376	Sil1	endoplasmic reticulum chaperone SIL1 homolog (S. cerevisiae)
	ENSMUSG00000024391	0.969982	0.00175	Apom	apolipoprotein M
	ENSMUSG00000024395	0.818834	0.0128	Lims2	LIM and senescent cell antigen like domains 2
	ENSMUSG00000024413	0.863843	0.021	Npc1	Niemann-Pick type C1
	ENSMUSG00000024423	1.23586	0.0027	Impact	impact, RWD domain protein
	ENSMUSG00000024424	0.982244	0.01655	Ttc39c	tetratricopeptide repeat domain 39C
	ENSMUSG00000024430	1.35496	0.00405	Cabyr	calcium-binding tyrosine-(Y)-phosphorylation regulated (fibrousheathin 2)
	ENSMUSG00000024570	0.803729	0.02905	Rbfa	ribosome binding factor A
	ENSMUSG00000024608	1.08716	0.0049	Rps14	ribosomal protein S14
	ENSMUSG00000024659	1.70691	0.0497	Anxa1	annexin A1
	ENSMUSG00000024663	1.43747	0.003	Rab3il1	RAB3A interacting protein (rabin3)-like 1
	ENSMUSG00000024735	0.610731	0.0487	Prpf19	pre-mRNA processing factor 19
	ENSMUSG00000024759	0.774825	0.0134	Atl3	atlastin GTPase 3
	ENSMUSG00000024782	0.856632	0.01195	Ak3	adenylate kinase 3
	ENSMUSG00000024789	0.959902	0.01135	Jak2	Janus kinase 2
	ENSMUSG00000024805	1.19459	0.00665	Pcgf5	polycomb group ring finger 5
	ENSMUSG00000024875	0.778454	0.0402	Yif1a	Yip1 interacting factor homolog A (S. cerevisiae)
	ENSMUSG00000024962	1.30333	0.0149	Vegfb	vascular endothelial growth factor B
	ENSMUSG00000024978	0.895372	0.0345	Gpam	glycerol-3-phosphate acyltransferase, mitochondrial
	ENSMUSG00000025036	1.00459	0.0154	Sfxn2	sideroflexin 2
	ENSMUSG00000025086	0.832271	0.02935	Trub1	TruB pseudouridine (psi) synthase family member 1
	ENSMUSG00000025132	0.893479	0.01035	Arhgdia	Rho GDP dissociation inhibitor (GDI) alpha
	ENSMUSG00000025153	0.872535	0.0186	Fasn	fatty acid synthase
	ENSMUSG00000025228	0.710938	0.0451	Actr1a	ARP1 actin-related protein 1A, centractin alpha
	ENSMUSG00000025266	1.96447	0.0002	Gnl3l	guanine nucleotide binding protein-like 3 (nucleolar)-like
	ENSMUSG00000025279	0.818393	0.02565	Dnase1l3	deoxyribonuclease 1-like 3
	ENSMUSG00000025362	0.940559	0.03035	Rps26	ribosomal protein S26
	ENSMUSG00000025381	1.06204	0.0128	Cnpy2	canopy FGF signaling regulator 2
	ENSMUSG00000025405	0.734273	0.03055	Inhbc	inhibin beta-C
	ENSMUSG00000025497	1.00782	0.00295	Cdhr5	cadherin-related family member 5
	ENSMUSG00000025574	1.78379	0.0248	Tk1	thymidine kinase 1
	ENSMUSG00000025579	0.757961	0.0326	Gaa	glucosidase, alpha, acid
	ENSMUSG00000025702	0.920209	0.0286	March8	membrane-associated ring finger (C3HC4) 8
	ENSMUSG00000025764	0.693661	0.03595	Phf17
	ENSMUSG00000025795	0.844139	0.01255	Rassf3	Ras association (RalGDS/AF-6) domain family member 3
	ENSMUSG00000025825	0.873056	0.0222	Iscu	iron-sulfur cluster assembly enzyme
	ENSMUSG00000025869	0.914239	0.0348	Nop16	NOP16 nucleolar protein
	ENSMUSG00000025887	1.62295	0.00315	Casp12	caspase 12
	ENSMUSG00000025935	0.717638	0.02655	Tram1	translocating chain-associating membrane protein 1
	ENSMUSG00000025962	1.22151	0.0258	Fastkd2	FAST kinase domains 2
	ENSMUSG00000025993	1.0449	0.0012	Slc40a1	solute carrier family 40 (iron-regulated transporter), member 1
	ENSMUSG00000026021	0.931711	0.03385	Sumo1	small ubiquitin-like modifier 1
	ENSMUSG00000026072	0.814137	0.0229	Il1r1	interleukin 1 receptor, type I
	ENSMUSG00000026103	1.45921	0.00615	Gls	glutaminase
	ENSMUSG00000026112	0.895093	0.0204	Coa5	cytochrome C oxidase assembly factor 5
	ENSMUSG00000026170	0.791756	0.02115	Cyp27a1	cytochrome P450, family 27, subfamily a, polypeptide 1
	ENSMUSG00000026176	0.709368	0.03405	Ctdsp1	CTD (carboxy-terminal domain, RNA polymerase II, polypeptide A) small phosphatase 1
	ENSMUSG00000026249	0.997993	0.01205	Serpine2	serine (or cysteine) peptidase inhibitor, clade E, member 2
	ENSMUSG00000026259	0.75521	0.0267	Ngef	neuronal guanine nucleotide exchange factor
	ENSMUSG00000026317	1.4621	0.01945	Cln8	ceroid-lipofuscinosis, neuronal 8
	ENSMUSG00000026368	0.612096	0.04705	F13b	coagulation factor XIII, beta subunit
	ENSMUSG00000026434	0.701383	0.0263	Nucks1	nuclear casein kinase and cyclin-dependent kinase substrate 1
	ENSMUSG00000026455	0.906896	0.04725	Klhl12	kelch-like 12
	ENSMUSG00000026509	0.800566	0.0178	Capn2	calpain 2
	ENSMUSG00000026542	1.07068	0.0021	Apcs	serum amyloid P-component
	ENSMUSG00000026571	0.98759	0.00235	Dcaf6	DDB1 and CUL4 associated factor 6
	ENSMUSG00000026663	0.953356	0.00205	Atf6	activating transcription factor 6
	ENSMUSG00000026678	0.94568	0.01545	Rgs5	regulator of G-protein signaling 5
	ENSMUSG00000026822	2.49707	5e-05	Lcn2	lipocalin 2
	ENSMUSG00000026853	0.819972	0.036	Crat	carnitine acetyltransferase
	ENSMUSG00000026858	0.721833	0.0474	Fam73b	family with sequence similarity 73, member B
	ENSMUSG00000026930	1.59479	0.0054	Gpsm1	G-protein signalling modulator 1 (AGS3-like, C. elegans)
	ENSMUSG00000026939	2.15349	0.0084	Tmem141	transmembrane protein 141
	ENSMUSG00000027130	1.07089	0.0297	Slc12a6	solute carrier family 12, member 6
	ENSMUSG00000027366	0.967731	0.0068	Sppl2a	signal peptide peptidase like 2A
	ENSMUSG00000027487	0.970391	0.04855	Cdk5rap1	CDK5 regulatory subunit associated protein 1
	ENSMUSG00000027495	0.745683	0.022	Fam210b	family with sequence similarity 210, member B
	ENSMUSG00000027533	1.77254	0.01015	Fabp5	fatty acid binding protein 5, epidermal
	ENSMUSG00000027601	0.964382	0.0182	Mtfr1	mitochondrial fission regulator 1
	ENSMUSG00000027630	0.627091	0.04355	Tbl1xr1	transducin (beta)-like 1X-linked receptor 1
	ENSMUSG00000027678	0.81232	0.0333	Ncoa3	nuclear receptor coactivator 3
	ENSMUSG00000027823	0.781979	0.0405	Gmps	guanine monophosphate synthetase
	ENSMUSG00000027931	0.925096	0.02495	Npr1	natriuretic peptide receptor 1
	ENSMUSG00000027954	1.11282	0.00175	Efna1	ephrin A1
	ENSMUSG00000027998	0.935077	0.0271	Plrg1	pleiotropic regulator 1
	ENSMUSG00000028013	1.08942	0.02	Ppa2	pyrophosphatase (inorganic) 2
	ENSMUSG00000028059	0.624373	0.0417	Arhgef2	rho/rac guanine nucleotide exchange factor (GEF) 2
	ENSMUSG00000028107	0.733131	0.03325	Tars2	threonyl-tRNA synthetase 2, mitochondrial (putative)
	ENSMUSG00000028121	0.937461	0.0056	Bcar3	breast cancer anti-estrogen resistance 3
	ENSMUSG00000028138	0.697536	0.0216	Adh5	alcohol dehydrogenase 5 (class III), chi polypeptide
	ENSMUSG00000028145	1.0025	0.007	Them4	thioesterase superfamily member 4
	ENSMUSG00000028150	0.838557	0.0139	Rorc	RAR-related orphan receptor gamma
	ENSMUSG00000028158	0.813988	0.0172	Mttp	microsomal triglyceride transfer protein
	ENSMUSG00000028228	0.712745	0.0346	Cpne3	copine III
	ENSMUSG00000028318	1.42372	0.0224	Polr1e	polymerase (RNA) I polypeptide E
	ENSMUSG00000028385	2.06482	0.02375	Snx30	sorting nexin family member 30
	ENSMUSG00000028402	1.20043	0.02025	Mpdz	multiple PDZ domain protein
	ENSMUSG00000028439	1.26164	0.028	Fam219a	family with sequence similarity 219, member A
	ENSMUSG00000028445	1.43308	0.0161	Enho	energy homeostasis associated
	ENSMUSG00000028484	1.27268	0.03085	Psip1	PC4 and SFRS1 interacting protein 1
	ENSMUSG00000028495	1.13645	0.00215	Rps6	ribosomal protein S6
	ENSMUSG00000028522	0.968791	0.0489	Mier1	MEIR1 treanscription regulator
	ENSMUSG00000028538	0.718465	0.02445	St3gal3	ST3 beta-galactoside alpha-2,3-sialyltransferase 3
	ENSMUSG00000028630	0.90017	0.02	Dyrk2	dual-specificity tyrosine-(Y)-phosphorylation regulated kinase 2
	ENSMUSG00000028684	0.794771	0.04795	Urod	uroporphyrinogen decarboxylase
	ENSMUSG00000028713	1.23214	0.0043	Cyp4b1	cytochrome P450, family 4, subfamily b, polypeptide 1
	ENSMUSG00000028741	0.817222	0.0433	Mrto4	mRNA turnover 4, ribosome maturation factor
	ENSMUSG00000028798	0.899192	0.0253	Eif3i	eukaryotic translation initiation factor 3, subunit I
	ENSMUSG00000028822	0.888842	0.02335	Tmem50a	transmembrane protein 50A
	ENSMUSG00000028964	0.668547	0.0419	Park7	Parkinson disease (autosomal recessive, early onset) 7
	ENSMUSG00000028982	1.34233	0.005	Slc25a33	solute carrier family 25, member 33
	ENSMUSG00000028999	0.915046	0.03575	Rint1	RAD50 interactor 1
	ENSMUSG00000029034	1.61131	0.0063	Cpsf3l	cleavage and polyadenylation specific factor 3-like
	ENSMUSG00000029048	0.794817	0.02715	Rer1	retention in endoplasmic reticulum sorting receptor 1
	ENSMUSG00000029163	0.812723	0.02495	Emilin1	elastin microfibril interfacer 1
	ENSMUSG00000029178	0.703941	0.0356	Klf3	Kruppel-like factor 3 (basic)
	ENSMUSG00000029438	0.979333	0.00585	Bcl7a	B cell CLL/lymphoma 7A
	ENSMUSG00000029458	1.06975	0.01365	Brap	BRCA1 associated protein
	ENSMUSG00000029524	1.08028	0.02335	Sirt4	sirtuin 4
	ENSMUSG00000029545	0.738702	0.041	Acads	acyl-Coenzyme A dehydrogenase, short chain
	ENSMUSG00000029656	1.25436	0.0008	C8b	complement component 8, beta polypeptide
	ENSMUSG00000029672	1.18541	0.0216	Fam3c	family with sequence similarity 3, member C
	ENSMUSG00000029727	0.663435	0.03135	Cyp3a13	cytochrome P450, family 3, subfamily a, polypeptide 13
	ENSMUSG00000029781	0.862202	0.03125	Fkbp9	FK506 binding protein 9
	ENSMUSG00000029802	0.748905	0.0199	Abcg2	ATP-binding cassette, sub-family G (WHITE), member 2
	ENSMUSG00000029863	0.980872	0.0483	Casp2	caspase 2
	ENSMUSG00000030102	0.851935	0.0099	Itpr1	inositol 1,4,5-trisphosphate receptor 1
	ENSMUSG00000030108	0.777725	0.01865	Slc6a13	solute carrier family 6 (neurotransmitter transporter, GABA), member 13
	ENSMUSG00000030203	0.719575	0.02875	Dusp16	dual specificity phosphatase 16
	ENSMUSG00000030207	1.26041	0.0014	8430419L09Rik
	ENSMUSG00000030225	0.840817	0.02435	Dera	deoxyribose-phosphate aldolase (putative)
	ENSMUSG00000030244	0.982569	0.0016	Gys2	glycogen synthase 2
	ENSMUSG00000030249	1.00814	0.00225	Abcc9	ATP-binding cassette, sub-family C (CFTR/MRP), member 9
	ENSMUSG00000030327	0.793082	0.03315	Necap1	NECAP endocytosis associated 1
	ENSMUSG00000030339	0.966997	0.00325	Ltbr	lymphotoxin B receptor
	ENSMUSG00000030386	0.839317	0.0297	Zfp606	zinc finger protein 606
	ENSMUSG00000030538	1.24703	0.00655	Cib1	calcium and integrin binding 1 (calmyrin)
	ENSMUSG00000030605	1.38183	0.00345	Mfge8	milk fat globule-EGF factor 8 protein
	ENSMUSG00000030629	0.734528	0.02975	Zfand6	zinc finger, AN1-type domain 6
	ENSMUSG00000030741	0.858397	0.02195	Spns1	spinster homolog 1
	ENSMUSG00000030782	1.17887	0.0117	Tgfb1i1	transforming growth factor beta 1 induced transcript 1
	ENSMUSG00000030827	1.17011	0.01055	Fgf21	fibroblast growth factor 21
	ENSMUSG00000030909	0.685828	0.0279	Anks4b	ankyrin repeat and sterile alpha motif domain containing 4B
	ENSMUSG00000030968	1.32264	0.0092	Pdilt	protein disulfide isomerase-like, testis expressed
	ENSMUSG00000030987	0.684679	0.04465	Stim1	stromal interaction molecule 1
	ENSMUSG00000031016	1.03512	0.01245	Wee1	WEE 1 homolog 1 (S. pombe)
	ENSMUSG00000031068	0.932734	0.0161	Glrx3	glutaredoxin 3
	ENSMUSG00000031129	1.19204	0.0107	Slc9a9	solute carrier family 9 (sodium/hydrogen exchanger), member 9
	ENSMUSG00000031216	0.893775	0.03335	Stard8	START domain containing 8
	ENSMUSG00000031320	1.22143	0.0006	Rps4x	ribosomal protein S4, X-linked
	ENSMUSG00000031378	0.756313	0.0483	Abcd1	ATP-binding cassette, sub-family D (ALD), member 1
	ENSMUSG00000031447	0.638252	0.0429	Lamp1	lysosomal-associated membrane protein 1
	ENSMUSG00000031523	0.679197	0.04915	Dlc1	deleted in liver cancer 1
	ENSMUSG00000031556	1.01111	0.03495	Tm2d2	TM2 domain containing 2
	ENSMUSG00000031565	1.08941	0.0219	Fgfr1	fibroblast growth factor receptor 1
	ENSMUSG00000031594	1.28902	0.0059	Fgl1	fibrinogen-like protein 1
	ENSMUSG00000031595	1.88215	0.04235	Pdgfrl	platelet-derived growth factor receptor-like
	ENSMUSG00000031645	0.717756	0.0277	F11	coagulation factor XI
	ENSMUSG00000031683	1.39357	0.03115	Lsm6	LSM6 homolog, U6 small nuclear RNA and mRNA degradation associated
	ENSMUSG00000031722	0.992729	0.0454	Hp	haptoglobin
	ENSMUSG00000031725	0.671875	0.0354	Ces1f	carboxylesterase 1F
	ENSMUSG00000031765	1.06608	0.02	Mt1	metallothionein 1
	ENSMUSG00000031790	0.957869	0.00555	Mmp15	matrix metallopeptidase 15
	ENSMUSG00000031833	0.681756	0.03365	Mast3	microtubule associated serine/threonine kinase 3
	ENSMUSG00000032012	0.770989	0.0233	Pvrl1
	ENSMUSG00000032014	0.88573	0.00625	Oaf	out at first homolog
	ENSMUSG00000032066	1.24338	0.0042	Bco2	beta-carotene oxygenase 2
	ENSMUSG00000032114	0.74395	0.02015	Slc37a4	solute carrier family 37 (glucose-6-phosphate transporter), member 4
	ENSMUSG00000032185	1.11177	0.0223	Carm1	coactivator-associated arginine methyltransferase 1
	ENSMUSG00000032193	0.689962	0.02805	Ldlr	low density lipoprotein receptor
	ENSMUSG00000032215	1.31798	0.01785	Rsl24d1	ribosomal L24 domain containing 1
	ENSMUSG00000032294	1.19096	0.0041	Pkm	pyruvate kinase, muscle
	ENSMUSG00000032301	0.850161	0.0131	Psma4	proteasome (prosome, macropain) subunit, alpha type 4
	ENSMUSG00000032312	0.776552	0.0145	Csk	c-src tyrosine kinase
	ENSMUSG00000032366	1.15038	0.0013	Tpm1	tropomyosin 1, alpha
	ENSMUSG00000032386	1.05848	0.0019	Trip4	thyroid hormone receptor interactor 4
	ENSMUSG00000032387	1.05709	0.00675	Rbpms2	RNA binding protein with multiple splicing 2
	ENSMUSG00000032462	0.845107	0.02705	Pik3cb	phosphatidylinositol 3-kinase, catalytic, beta polypeptide
	ENSMUSG00000032562	0.663514	0.04605	Gnai2	guanine nucleotide binding protein (G protein), alpha inhibiting 2
	ENSMUSG00000032590	0.674829	0.02905	Apeh	acylpeptide hydrolase
	ENSMUSG00000032601	0.713345	0.03905	Prkar2a	protein kinase, cAMP dependent regulatory, type II alpha
	ENSMUSG00000032667	1.16683	0.04795	Pon2	paraoxonase 2
	ENSMUSG00000032735	0.845748	0.01895	Ablim3	actin binding LIM protein family, member 3
	ENSMUSG00000032834	0.892177	0.02275	Pwp2	PWP2 periodic tryptophan protein homolog (yeast)
	ENSMUSG00000032898	0.714236	0.02805	Fbxo21	F-box protein 21
	ENSMUSG00000033114	0.826432	0.0371	Slc35d2	solute carrier family 35, member D2
	ENSMUSG00000033159	0.628546	0.0482	Cnppd1	cyclin Pas1/PHO80 domain containing 1
	ENSMUSG00000033365	0.934999	0.01385	Ipo13	importin 13
	ENSMUSG00000033530	0.749808	0.01725	Ttc7b	tetratricopeptide repeat domain 7B
	ENSMUSG00000033610	0.871789	0.00565	Pank1	pantothenate kinase 1
	ENSMUSG00000033634	0.940571	0.01565	Cml2
	ENSMUSG00000033767	0.784184	0.0159	D930015E06Rik	RIKEN cDNA D930015E06 gene
	ENSMUSG00000033871	0.836876	0.0169	Ppargc1b	peroxisome proliferative activated receptor, gamma, coactivator 1 beta
	ENSMUSG00000033916	0.719049	0.0382	Chmp2a	charged multivesicular body protein 2A
	ENSMUSG00000033955	0.842926	0.005	Tnks1bp1	tankyrase 1 binding protein 1
	ENSMUSG00000034006	1.05467	0.0047	Pqlc1	PQ loop repeat containing 1
	ENSMUSG00000034218	0.91974	0.0416	Atm	ataxia telangiectasia mutated
	ENSMUSG00000034247	0.81305	0.0331	Plekhm1	pleckstrin homology domain containing, family M (with RUN domain) member 1
	ENSMUSG00000034371	1.08977	0.0021	Dak
	ENSMUSG00000034382	1.11761	0.00995	AI661453	expressed sequence AI661453
	ENSMUSG00000034403	0.797617	0.0228	Pja1	praja ring finger 1, E3 ubiquitin protein ligase
	ENSMUSG00000034522	0.711356	0.0271	Zfp395	zinc finger protein 395
	ENSMUSG00000034563	0.917269	0.00745	Ccpg1	cell cycle progression 1
	ENSMUSG00000034636	0.838962	0.0349	Zyg11b	zyg-ll family member B, cell cycle regulator
	ENSMUSG00000034707	0.691341	0.02695	Gns	glucosamine (N-acetyl)-6-sulfatase
	ENSMUSG00000034708	0.955439	0.0062	Grn	granulin
	ENSMUSG00000034758	1.46025	0.00595	Tle6	transducin-like enhancer of split 6
	ENSMUSG00000034800	1.08584	0.03655	Zfp661	zinc finger protein 661
	ENSMUSG00000034892	0.811051	0.0211	Rps29	ribosomal protein S29
	ENSMUSG00000034926	0.787966	0.027	Dhcr24	24-dehydrocholesterol reductase
	ENSMUSG00000035031	1.03434	0.00945	C8a	complement component 8, alpha polypeptide
	ENSMUSG00000035473	0.689545	0.05	Galm	galactose mutarotase
	ENSMUSG00000035765	0.765315	0.0164	Dym	dymeclin
	ENSMUSG00000035878	0.75075	0.0207	Hykk	hydroxylysine kinase 1
	ENSMUSG00000035944	0.833358	0.0459	Ttc38	tetratricopeptide repeat domain 38
	ENSMUSG00000036054	0.776076	0.042	Sugp2	SURP and G patch domain containing 2
	ENSMUSG00000036110	0.7843	0.0278	Slc17a2	solute carrier family 17 (sodium phosphate), member 2
	ENSMUSG00000036151	1.1575	0.02535	Tm6sf2	transmembrane 6 superfamily member 2
	ENSMUSG00000036180	0.66032	0.04515	Gatad2a	GATA zinc finger domain containing 2A
	ENSMUSG00000036216	0.813824	0.03995	Leap2	liver-expressed antimicrobial peptide 2
	ENSMUSG00000036427	0.689054	0.03	Gpi1	glucose phosphate isomerase 1
	ENSMUSG00000036478	0.870167	0.0154	Btg1	B cell translocation gene 1, anti-proliferative
	ENSMUSG00000036570	0.7505	0.0289	Fxyd1	FXYD domain-containing ion transport regulator 1
	ENSMUSG00000036781	0.871418	0.0157	Rps27l	ribosomal protein S27-like
	ENSMUSG00000036817	0.921128	0.01785	Sun1	Sad1 and UNC84 domain containing 1
	ENSMUSG00000036820	1.0784	0.0152	Amdhd2	amidohydrolase domain containing 2
	ENSMUSG00000036863	0.762271	0.0332	Syde2	synapse defective 1, Rho GTPase, homolog 2 (C. elegans)
	ENSMUSG00000037062	0.809096	0.0338	Sh3glb1	SH3-domain GRB2-like B1 (endophilin)
	ENSMUSG00000037119	0.737015	0.0203	D15Ertd621e
	ENSMUSG00000037415	0.672721	0.02725	Ranbp10	RAN binding protein 10
	ENSMUSG00000037461	0.773847	0.0359	Ints7	integrator complex subunit 7
	ENSMUSG00000037465	0.876696	0.00585	Klf10	Kruppel-like factor 10
	ENSMUSG00000037503	0.912286	0.0242	Fam168b	family with sequence similarity 168, member B
	ENSMUSG00000037583	1.4732	5e-05	Nr0b2	nuclear receptor subfamily 0, group B, member 2
	ENSMUSG00000037621	1.38552	0.001	Atoh8	atonal bHLH transcription factor 8
	ENSMUSG00000037622	0.873584	0.01585	Wdtc1	WD and tetratricopeptide repeats 1
	ENSMUSG00000037703	0.742233	0.02935	Lzts3	leucine zipper, putative tumor suppressor family member 3
	ENSMUSG00000037750	0.767127	0.0376	Fam222b	family with sequence similarity 222, member B
	ENSMUSG00000037787	1.01251	0.0479	Apopt1	apoptogenic, mitochondrial 1
	ENSMUSG00000037797	0.923397	0.00515	Adh4	alcohol dehydrogenase 4 (class II), pi polypeptide
	ENSMUSG00000037894	1.04264	0.04315	H2afz	H2A histone family, member Z
	ENSMUSG00000037902	1.05154	0.03425	Sirpa	signal-regulatory protein alpha
	ENSMUSG00000038069	0.725714	0.04855	Cdkn2aip	CDKN2A interacting protein
	ENSMUSG00000038167	0.890774	0.0138	Plekhg6	pleckstrin homology domain containing, family G (with RhoGef domain) member 6
	ENSMUSG00000038235	0.786116	0.03135	F11r	F11 receptor
	ENSMUSG00000038250	0.757178	0.04735	Usp38	ubiquitin specific peptidase 38
	ENSMUSG00000038323	0.810526	0.04985	1700066M21Rik	RIKEN cDNA 1700066M21 gene
	ENSMUSG00000038324	0.75735	0.0157	Trpc4ap	transient receptor potential cation channel, subfamily C, member 4 associated protein
	ENSMUSG00000038393	1.63058	0.0061	Txnip	thioredoxin interacting protein
	ENSMUSG00000038515	0.780427	0.0276	Grtp1	GH regulated TBC protein 1
	ENSMUSG00000038539	1.17367	0.0146	Atf5	activating transcription factor 5
	ENSMUSG00000038704	0.66143	0.0333	Aspdh	aspartate dehydrogenase domain containing
	ENSMUSG00000038838	1.04011	0.0264	Vars2	valyl-tRNA synthetase 2, mitochondrial
	ENSMUSG00000038902	1.02413	0.02005	Pogz	pogo transposable element with ZNF domain
	ENSMUSG00000039018	1.291	0.03905	Mtg1	mitochondrial ribosome-associated GTPase 1
	ENSMUSG00000039062	0.705168	0.027	Anpep	alanyl (membrane) aminopeptidase
	ENSMUSG00000039244	0.98347	0.04595	E130309D02Rik	RIKEN cDNA E130309D02 gene
	ENSMUSG00000039286	1.04761	0.0017	Fndc3b	fibronectin type III domain containing 3B
	ENSMUSG00000039308	0.786115	0.0186	Ndst2	N-deacetylase/N-sulfotransferase (heparan glucosaminyl) 2
	ENSMUSG00000039382	0.962584	0.0097	Wdr45	WD repeat domain 45
	ENSMUSG00000039519	1.38279	0.0004	Cyp7b1	cytochrome P450, family 7, subfamily b, polypeptide 1
	ENSMUSG00000039831	0.671107	0.04385	Arhgap29	Rho GTPase activating protein 29
	ENSMUSG00000039886	0.86144	0.02055	Tmem120a	transmembrane protein 120A
	ENSMUSG00000040007	1.40585	0.0015	Bahd1	bromo adjacent homology domain containing 1
	ENSMUSG00000040093	1.42766	0.04035	Bmf	BCL2 modifying factor
	ENSMUSG00000040127	0.847946	0.01695	Sdr9c7	4short chain dehydrogenase/reductase family 9C, member 7
	ENSMUSG00000040188	0.778393	0.0467	Scamp2	secretory carrier membrane protein 2
	ENSMUSG00000040363	0.871252	0.0168	Bcor	BCL6 interacting corepressor
	ENSMUSG00000040423	1.54777	0.02625	Rc3h1	RING CCCH (C3H) domains 1
	ENSMUSG00000040706	0.611826	0.0449	Agmat	agmatine ureohydrolase (agmatinase)
	ENSMUSG00000040740	0.907092	0.02615	Slc25a34	solute carrier family 25, member 34
	ENSMUSG00000040848	1.14027	0.00785	Sft2d2	SFT2 domain containing 2
	ENSMUSG00000040883	0.741731	0.0423	Tmem205	transmembrane protein 205
	ENSMUSG00000040918	0.99206	0.0159	Slc19a2	solute carrier family 19 (thiamine transporter), member 2
	ENSMUSG00000040952	1.59163	0.0013	Rps19	ribosomal protein S19
	ENSMUSG00000041044	0.888275	0.0124	Lrit1	leucine-rich repeat, immunoglobulin-like and transmembrane domains 1
	ENSMUSG00000041126	1.94644	0.0021	H2afv	H2A histone family, member V
	ENSMUSG00000041261	0.670455	0.03515	Car8	carbonic anhydrase 8
	ENSMUSG00000041272	0.842282	0.045	Tox	thymocyte selection-associated high mobility group box
	ENSMUSG00000041362	0.730321	0.03565	4930506M07Rik
	ENSMUSG00000041438	0.864313	0.0276	Cirh1a	cirrhosis, autosomal recessive 1A (human)
	ENSMUSG00000041567	1.15076	0.0105	Serpina12	serine (or cysteine) peptidase inhibitor, clade A (alpha-1 antiproteinase, antitrypsin), member 12
	ENSMUSG00000041571	1.18195	0.00345	Sepw1	selenoprotein W, muscle 1
	ENSMUSG00000041577	1.24061	0.0062	Prelp	proline arginine-rich end leucine-rich repeat
	ENSMUSG00000041698	1.39216	0.00115	Slco1a1	solute carrier organic anion transporter family, member 1a1
	ENSMUSG00000041895	1.18671	0.006	Wipi1	WD repeat domain, phosphoinositide interacting 1
	ENSMUSG00000041926	1.01889	0.014	Rnpep	arginyl aminopeptidase (aminopeptidase B)
	ENSMUSG00000041939	0.953079	0.04935	Mvk	mevalonate kinase
	ENSMUSG00000042079	0.780691	0.04465	Hnrnpf	heterogeneous nuclear ribonucleoprotein F
	ENSMUSG00000042447	0.73223	0.0449	Mios	missing oocyte, meiosis regulator, homolog (Drosophila)
	ENSMUSG00000042541	0.940766	0.03195	Shfm1	split hand/foot malformation (ectrodactyly) type 1
	ENSMUSG00000042572	0.842199	0.0205	Ube2q1	ubiquitin-conjugating enzyme E2Q family member 1
	ENSMUSG00000042680	0.863446	0.00575	Garem	GRB2 associated, regulator of MAPK1
	ENSMUSG00000042688	1.11355	0.00475	Mapk6	mitogen-activated protein kinase 6
	ENSMUSG00000042745	1.49337	0.0141	Id1	inhibitor of DNA binding 1
	ENSMUSG00000042978	0.80243	0.0197	Sbk1	SH3-binding kinase 1
	ENSMUSG00000043987	1.14041	0.0499	Cep164	centrosomal protein 164
	ENSMUSG00000043991	0.729476	0.0306	Pura	purine rich element binding protein A
	ENSMUSG00000044026	1.17788	0.0054	Slc35g1	solute carrier family 35, member G1
	ENSMUSG00000044345	1.25435	0.0001	Marveld1	MARVEL (membrane-associating) domain containing 1
	ENSMUSG00000044469	0.982778	0.00545	Tnfaip8l1	tumor necrosis factor, alpha-induced protein 8-like 1
	ENSMUSG00000044700	1.08241	0.00445	Tmem201	transmembrane protein 201
	ENSMUSG00000044788	0.77972	0.01535	Fads6	fatty acid desaturase domain family, member 6
	ENSMUSG00000045294	1.17263	0.00065	Insig1	insulin induced gene 1
	ENSMUSG00000045441	1.06803	0.0014	Gprin3	GPRIN family member 3
	ENSMUSG00000045767	0.814858	0.0211	B230219D22Rik	RIKEN cDNA B230219D22 gene
	ENSMUSG00000046062	0.709393	0.03015	Ppp1r15b	protein phosphatase 1, regulatory (inhibitor) subunit 15b
	ENSMUSG00000046447	0.784169	0.01385	Camk2n1	calcium/calmodulin-dependent protein kinase II inhibitor 1
	ENSMUSG00000046470	1.2299	0.0133	Sox18	SRY (sex determining region Y)-box 18
	ENSMUSG00000046668	0.727991	0.0365	Cxxc5	CXXC finger 5
	ENSMUSG00000046794	0.818838	0.03935	Ppp1r3b	protein phosphatase 1, regulatory (inhibitor) subunit 3B
	ENSMUSG00000046814	1.06367	0.0295	Gchfr	GTP cyclohydrolase I feedback regulator
	ENSMUSG00000047213	0.687844	0.0448	Ythdf3	YTH domain family 3
	ENSMUSG00000047407	1.02047	0.00705	Tgif1	TGFB-induced factor homeobox 1
	ENSMUSG00000047459	0.844003	0.0395	Dynlrb1	dynein light chain roadblock-type 1
	ENSMUSG00000047492	0.627952	0.04275	Inhbe	inhibin beta-E
	ENSMUSG00000047617	0.899729	0.02455	BC029214	cDNA sequence BC029214
	ENSMUSG00000047888	0.795587	0.01075	Tnrc6b	trinucleotide repeat containing 6b
	ENSMUSG00000048007	1.74837	0.00345	Timm8a1	translocase of inner mitochondrial membrane 8A1
	ENSMUSG00000048087	0.66974	0.03345	Gm4737	predicted gene 4737
	ENSMUSG00000048175	1.02079	0.0294	Asb8	ankyrin repeat and SOCS box-containing 8
	ENSMUSG00000048217	0.708862	0.0433	Nags	N-acetylglutamate synthase
	ENSMUSG00000048307	0.808441	0.0289	Ankrd46	ankyrin repeat domain 46
	ENSMUSG00000048371	1.05932	0.0198	Pdp2	pyruvate dehyrogenase phosphatase catalytic subunit 2
	ENSMUSG00000048489	1.33119	0.00045	8430408G22Rik	RIKEN cDNA 8430408G22 gene
	ENSMUSG00000048546	0.84852	0.0272	Tob2	transducer of ERBB2, 2
	ENSMUSG00000048833	0.928107	0.03785	Slc39a9	solute carrier family 39 (zinc transporter), member 9
	ENSMUSG00000048856	1.31651	0.0003	Slc25a47	solute carrier family 25, member 47
	ENSMUSG00000049090	0.960246	0.0087	Zadh2	zinc binding alcohol dehydrogenase, domain containing 2
	ENSMUSG00000049299	1.43693	0.00305	Trappc1	trafficking protein particle complex 1
	ENSMUSG00000049339	0.748103	0.0273	Fam134a	family with sequence similarity 134, member A
	ENSMUSG00000049517	0.809877	0.04225	Rps23	ribosomal protein S23
	ENSMUSG00000049521	0.766612	0.01915	Cdc42ep1	CDC42 effector protein (Rho GTPase binding) 1
	ENSMUSG00000049672	0.752659	0.04085	Zbtb14	zinc finger and BTB domain containing 14
	ENSMUSG00000049751	0.728223	0.028	Rpl36al	ribosomal protein L36A-like
	ENSMUSG00000050017	0.775892	0.02705	Pitpnb	phosphatidylinositol transfer protein, beta
	ENSMUSG00000050144	1.02001	0.00655	Slc25a44	solute carrier family 25, member 44
	ENSMUSG00000050390	0.817996	0.03515	C77080	expressed sequence C77080
	ENSMUSG00000050440	0.759233	0.0327	Hamp	hepcidin antimicrobial peptide
	ENSMUSG00000050708	0.934567	0.0133	Ftl1	ferritin light polypeptide 1
	ENSMUSG00000050777	1.24005	0.01065	Tmem37	transmembrane protein 37
	ENSMUSG00000051184	1.02983	0.0359	Zfp524	zinc finger protein 524
	ENSMUSG00000051339	0.896756	0.00835	2900026A02Rik	RIKEN cDNA 2900026A02 gene
	ENSMUSG00000051375	1.03746	0.00255	Pcdh1	protocadherin 1
	ENSMUSG00000051652	0.979074	0.00525	Lrrc3	leucine rich repeat containing 3
	ENSMUSG00000051748	0.843038	0.01005	1100001G20Rik
	ENSMUSG00000052214	0.860454	0.0297	Opa3	optic atrophy 3
	ENSMUSG00000052310	1.00654	0.0087	Slc39a1	solute carrier family 39 (zinc transporter), member 1
	ENSMUSG00000052395	1.11215	0.04665	Rft1	RFT1 homolog
	ENSMUSG00000052595	0.68311	0.0453	A1cf	APOBEC1 complementation factor
	ENSMUSG00000052609	0.807774	0.0087	Plekhg3	pleckstrin homology domain containing, family G (with RhoGef domain) member 3
	ENSMUSG00000052656	0.675479	0.03525	Rnf103	ring finger protein 103
	ENSMUSG00000052751	0.832693	0.04035	Repin1	replication initiator 1
	ENSMUSG00000052833	0.985959	0.0341	Sae1	SUMO1 activating enzyme subunit 1
	ENSMUSG00000053091	1.27465	0.0392	Lins
	ENSMUSG00000053565	0.805205	0.03905	Eif3k	eukaryotic translation initiation factor 3, subunit K
	ENSMUSG00000053931	0.621793	0.04845	Cnn3	calponin 3, acidic
	ENSMUSG00000054008	0.717789	0.023	Ndst1	N-deacetylase/N-sulfotransferase (heparan glucosaminyl) 1
	ENSMUSG00000054021	0.953611	0.03935	Sirt5	sirtuin 5
	ENSMUSG00000054855	1.18533	0.0195	Rnd1	Rho family GTPase 1
	ENSMUSG00000054889	0.794776	0.02845	Dsp	desmoplakin
	ENSMUSG00000055041	1.10004	0.0479	Commd5	COMM domain containing 5
	ENSMUSG00000055240	1.47319	0.00365	Zfp101	zinc finger protein 101
	ENSMUSG00000055991	0.846192	0.0293	Zkscan5	zinc finger with KRAB and SCAN domains 5
	ENSMUSG00000056429	0.632208	0.0451	Tgoln1	trans-golgi network protein
	ENSMUSG00000056493	0.814542	0.00935	Foxk1	forkhead box K1
	ENSMUSG00000056749	0.87189	0.01195	Nfil3	nuclear factor, interleukin 3, regulated
	ENSMUSG00000057036	1.03254	0.0183	Gm7536	ribosomal protein L27A pseudogene
	ENSMUSG00000057068	1.02121	0.0369	Fam47e	family with sequence similarity 47, member E
	ENSMUSG00000057465	5.29891	5e-05	Saa2	serum amyloid A 2
	ENSMUSG00000057522	0.809038	0.01515	Spop	speckle-type POZ protein
	ENSMUSG00000057541	0.972087	0.04385	Pus7	pseudouridylate synthase 7
	ENSMUSG00000057778	1.08782	0.02395	Cyb5d2	cytochrome b5 domain containing 2
	ENSMUSG00000058230	0.92109	0.0081	Grlf1
	ENSMUSG00000058392	1.19666	0.02595	Rrp1b	ribosomal RNA processing 1 homolog B (S. cerevisiae)
	ENSMUSG00000059291	0.809523	0.024	Rpl11	ribosomal protein L11
	ENSMUSG00000059878	0.940428	0.019	Zfp422	zinc finger protein 422
	ENSMUSG00000059974	1.73867	0.03535	Ntm	neurotrimin
	ENSMUSG00000060371	1.13613	0.0173	Caln1	calneuron 1
	ENSMUSG00000060639	1.17982	0.0252	Hist1h4i	histone cluster 1, H4i
	ENSMUSG00000060657	0.681065	0.02715	Marf1	meiosis arrest female 1
	ENSMUSG00000060743	0.744809	0.0359	H3f3a	H3 histone, family 3A
	ENSMUSG00000060803	2.11343	5e-05	Gstp1	glutathione S-transferase, pi 1
	ENSMUSG00000060938	0.780824	0.04285	Rpl26	ribosomal protein L26
	ENSMUSG00000061130	1.02003	0.00665	Ppm1b	protein phosphatase 1B, magnesium dependent, beta isoform
	ENSMUSG00000061313	1.16543	0.0017	Ddhd2	DDHD domain containing 2
	ENSMUSG00000061393	1.07719	0.01315	Acvr2b	activin receptor IIB
	ENSMUSG00000061477	1.02982	0.0062	Rps7	ribosomal protein S7
	ENSMUSG00000061607	1.00793	0.0286	Mdc1	mediator of DNA damage checkpoint 1
	ENSMUSG00000061906	0.652026	0.04	Ugt2b38	UDP glucuronosyltransferase 2 family, polypeptide B38
	ENSMUSG00000061981	0.922067	0.00895	Flot2	flotillin 2
	ENSMUSG00000062232	0.834511	0.04345	Rapgef2	Rap guanine nucleotide exchange factor (GEF) 2
	ENSMUSG00000062901	0.702017	0.01965	Klhl24	kelch-like 24
	ENSMUSG00000062960	1.02223	0.00545	Kdr	kinase insert domain protein receptor
	ENSMUSG00000062997	0.75554	0.0403	Rpl35	ribosomal protein L35
	ENSMUSG00000063232	1.18468	0.0018	Serpina11	serine (or cysteine) peptidase inhibitor, clade A (alpha-1 antiproteinase, antitrypsin), member 11
	ENSMUSG00000063931	0.903395	0.00565	Pepd	peptidase D
	ENSMUSG00000064254	0.922676	0.04525	Ethe1	ethylmalonic encephalopathy 1
	ENSMUSG00000064289	0.975718	0.04	Tank	TRAF family member-associated Nf-kappa B activator
	ENSMUSG00000065979	0.778343	0.03495	Cpped1	calcineurin-like phosphoesterase domain containing 1
	ENSMUSG00000066071	1.27463	0.0034	Cyp4a12a	cytochrome P450, family 4, subfamily a, polypeptide 12a
	ENSMUSG00000066640	0.890743	0.0493	Fbxl18	F-box and leucine-rich repeat protein 18
	ENSMUSG00000066735	0.998945	0.013	Vkorc1l1	vitamin K epoxide reductase complex, subunit 1-like 1
	ENSMUSG00000067274	0.824896	0.0291	Rplp0	ribosomal protein, large, P0
	ENSMUSG00000067713	0.77688	0.03425	Prkag1	protein kinase, AMP-activated, gamma 1 non-catalytic subunit
	ENSMUSG00000067719	0.983595	0.03395	Gm10221	ATP synthase, H+ transporting, mitochondrial F0 complex, subunit g pseudogene
	ENSMUSG00000068083	1.33115	0.001	Cyp2d40	cytochrome P450, family 2, subfamily d, polypeptide 40
	ENSMUSG00000068086	1.08708	0.03165	Cyp2d9	cytochrome P450, family 2, subfamily d, polypeptide 9
	ENSMUSG00000068742	0.873355	0.01195	Cry2	cryptochrome 2 (photolyase-like)
	ENSMUSG00000068823	0.642436	0.0355	Csde1	cold shock domain containing E1, RNA binding
	ENSMUSG00000068877	2.83996	0.00325	Selenbp2	selenium binding protein 2
	ENSMUSG00000069682	1.02569	0.04445	Gm10275	Rpl12 pseudogene
	ENSMUSG00000070426	0.847597	0.0413	Rnf121	ring finger protein 121
	ENSMUSG00000070565	0.795998	0.02895	Rasal2	RAS protein activator like 2
	ENSMUSG00000070643	1.48145	0.0014	Sox13	SRY (sex determining region Y)-box 13
	ENSMUSG00000070939	0.712952	0.02635	Tgfbrap1	transforming growth factor, beta receptor associated protein 1
	ENSMUSG00000071180	1.00259	0.03625	Smim15	small integral membrane protein 15
	ENSMUSG00000071226	1.07332	0.03775	Cecr2	cat eye syndrome chromosome region, candidate 2
	ENSMUSG00000071379	1.09481	0.02045	Hpcal1	hippocalcin-like 1
	ENSMUSG00000071528	1.51405	0.0099	Usmg5	upregulated during skeletal muscle growth 5
	ENSMUSG00000071551	0.811675	0.0184	Akr1c19	aldo-keto reductase family 1, member C19
	ENSMUSG00000071866	0.925334	0.0097	Ppia	peptidylprolyl isomerase A
	ENSMUSG00000072082	1.06024	0.00845	Ccnf	cyclin F
	ENSMUSG00000072849	2.78796	5e-05	Serpina1e	serine (or cysteine) peptidase inhibitor, clade A, member 1E
	ENSMUSG00000073563	0.791774	0.02915	Csnk1g3	casein kinase 1, gamma 3
	ENSMUSG00000073639	0.68661	0.04105	Rab18	RAB18, member RAS oncogene family
	ENSMUSG00000073700	0.876206	0.0093	Klhl21	kelch-like 21
	ENSMUSG00000073830	1.91204	0.00015	Mup14	major urinary protein 14
	ENSMUSG00000073834	2.92281	0.00055	Mup11	major urinary protein 11
	ENSMUSG00000073842	2.01756	0.01455	Mup7	major urinary protein 7
	ENSMUSG00000074063	1.45653	0.0001	Osgin1	oxidative stress induced growth inhibitor 1
	ENSMUSG00000074115	4.06277	5e-05	Saa1	serum amyloid A 1
	ENSMUSG00000074227	1.00827	0.03505	Spint2	serine protease inhibitor, Kunitz type 2
	ENSMUSG00000074283	1.12472	0.02685	Zfp109	zinc finger protein 109
	ENSMUSG00000074794	1.2838	0.0362	Arrdc3	arrestin domain containing 3
	ENSMUSG00000074828	0.779832	0.0164	Gm10768	predicted gene 10768
	ENSMUSG00000075470	0.920151	0.02185	Alg10b	asparagine-linked glycosylation 10B (alpha-1,2-glucosyltransferase)
	ENSMUSG00000078429	0.922436	0.0075	Ctdsp2	CTD (carboxy-terminal domain, RNA polymerase II, polypeptide A) small phosphatase 2
	ENSMUSG00000078597	2.55661	5e-05	Cyp4a12b	cytochrome P450, family 4, subfamily a, polypeptide 12B
	ENSMUSG00000078650	1.35784	0.00015	G6pc	glucose-6-phosphatase, catalytic
	ENSMUSG00000078674	1.50781	0.00135	Mup18	major urinary protein 18
	ENSMUSG00000078675	3.56755	5e-05	Mup16	major urinary protein 16
	ENSMUSG00000078683	2.21116	0.01545	Mup1	major urinary protein 1
	ENSMUSG00000078689	2.44385	5e-05	Mup6	major urinary protein 6
	ENSMUSG00000078812	0.753572	0.0373	Eif5a	eukaryotic translation initiation factor 5A
	ENSMUSG00000079215	1.17805	0.0467	Zfp664	zinc finger protein 664
	ENSMUSG00000079435	1.201	0.0056	Rpl36a	ribosomal protein L36A
	ENSMUSG00000080316	1.38695	0.0015	4930546H06Rik
	ENSMUSG00000089873	5.14123	0.00095	Mup13	major urinary protein 13
	ENSMUSG00000090247	1.11751	0.01565	Bloc1s1	biogenesis of lysosomal organelles complex-1, subunit 1
	ENSMUSG00000090306	1.08098	0.0138	Adh6-ps1	alcohol dehydrogenase 6 (class V), pseudogene 1
	ENSMUSG00000090394	1.31076	0.02465	4930523C07Rik	RIKEN cDNA 4930523C07 gene
	ENSMUSG00000091586	0.800928	0.0278	Cyp4f17	cytochrome P450, family 4, subfamily f, polypeptide 17
	ENSMUSG00000094793	5.2381	5e-05	Mup12	major urinary protein 12
	ENSMUSG00000096188	0.871165	0.0142	Cmtm4	CKLF-like MARVEL transmembrane domain containing 4
	ENSMUSG00000096674	4.83133	5e-05	Mup15	major urinary protein 15
	ENSMUSG00000096688	4.15603	5e-05	Mup17	major urinary protein 17
	ENSMUSG00000002944	-0.793342	0.0118	Cd36	CD36 antigen
	ENSMUSG00000020027	-0.941718	0.03235	Socs2	suppressor of cytokine signaling 2
	ENSMUSG00000020205	-0.969269	0.00445	Phlda1	pleckstrin homology like domain, family A, member 1
	ENSMUSG00000021108	-0.941341	0.01015	Prkch	protein kinase C, eta
	ENSMUSG00000021453	-2.20872	0.0002	Gadd45g	growth arrest and DNA-damage-inducible 45 gamma
	ENSMUSG00000021838	-1.3615	0.04995	Samd4	sterile alpha motif domain containing 4
	ENSMUSG00000022346	-1.6266	0.00015	Myc	myelocytomatosis oncogene
	ENSMUSG00000022951	-0.9418	0.0202	Rcan1	regulator of calcineurin 1
	ENSMUSG00000023272	-0.905163	0.00485	Creld2	cysteine-rich with EGF-like domains 2
	ENSMUSG00000024561	-0.772367	0.01685	Mbd1	methyl-CpG binding domain protein 1
	ENSMUSG00000025190	-0.842048	0.0283	Got1	glutamic-oxaloacetic transaminase 1, soluble
	ENSMUSG00000026825	-2.74142	0.0061	Dnm1	dynamin 1
	ENSMUSG00000028339	-1.30167	0.02115	Col15a1	collagen, type XV, alpha 1
	ENSMUSG00000029380	-1.16632	0.0133	Cxcl1	chemokine (C-X-C motif) ligand 1
	ENSMUSG00000030022	-0.999106	0.04825	Adamts9	a disintegrin-like and metallopeptidase (reprolysin type) with thrombospondin type 1 motif, 9
	ENSMUSG00000030107	-1.12553	0.0156	Usp18	ubiquitin specific peptidase 18
	ENSMUSG00000030257	-4.0234	0.02215	Srgap3	SLIT-ROBO Rho GTPase activating protein 3
	ENSMUSG00000030263	-1.04991	0.03915	Lrmp	lymphoid-restricted membrane protein
	ENSMUSG00000035202	-1.39792	0.0011	Lars2	leucyl-tRNA synthetase, mitochondrial
	ENSMUSG00000035948	-0.668532	0.0495	Acss3	acyl-CoA synthetase short-chain family member 3
	ENSMUSG00000035958	-1.1361	0.03965	Tdp2	tyrosyl-DNA phosphodiesterase 2
	ENSMUSG00000038415	-0.862439	0.0194	Foxq1	forkhead box Q1
	ENSMUSG00000040660	-2.26498	5e-05	Cyp2b9	cytochrome P450, family 2, subfamily b, polypeptide 9
	ENSMUSG00000048120	-0.946844	0.04165	Entpd1	ectonucleoside triphosphate diphosphohydrolase 1
	ENSMUSG00000048200	-1.62664	0.0344	Efcab4a
	ENSMUSG00000049109	-2.0665	0.0002	Themis	thymocyte selection associated
	ENSMUSG00000051506	-1.59124	0.02	Wdfy4	WD repeat and FYVE domain containing 4
	ENSMUSG00000051579	-1.43771	0.02725	Tceal8	transcription elongation factor A (SII)-like 8
	ENSMUSG00000052684	-0.988923	0.018	Jun	jun proto-oncogene
	ENSMUSG00000054588	-0.992391	0.01895	Gbp10	guanylate-binding protein 10
	ENSMUSG00000055148	-1.00244	0.0121	Klf2	Kruppel-like factor 2 (lung)
	ENSMUSG00000056035	-0.692491	0.04905	Cyp3a11	cytochrome P450, family 3, subfamily a, polypeptide 11
	ENSMUSG00000056978	-1.70875	0.0005	Hamp2	hepcidin antimicrobial peptide 2
	ENSMUSG00000067736	-1.32627	0.002	Gm10222	predicted gene 10222
	ENSMUSG00000074882	-0.868604	0.0084	Cyp2c68	cytochrome P450, family 2, subfamily c, polypeptide 68
	ENSMUSG00000090015	-2.33448	0.02555	Gm15446	predicted gene 15446
	ENSMUSG00000091867	-3.24827	5e-05	Cyp2a22	cytochrome P450, family 2, subfamily a, polypeptide 22
the result of log2 (Ratio) is positive represent up-regulated and the result of log2 (Ratio) is negative represent up-regulated

## Sheet: K VS C
		log2 (Ratio)	Adjusted P-value (Differentially expressed)	Annotation
	ID	kaempferol/control	kaempferol/control	Gene_symbol	Description
K VS C	ENSMUSG00000000326	0.735175	0.04975	Comt	catechol-O-methyltransferase
	ENSMUSG00000000976	0.91156	0.01005	Heatr6	HEAT repeat containing 6
	ENSMUSG00000001034	1.21042	0.0106	Mapk7	mitogen-activated protein kinase 7
	ENSMUSG00000001506	1.1541	0.0291	Col1a1	collagen, type I, alpha 1
	ENSMUSG00000001525	0.971926	0.0034	Tubb5	tubulin, beta 5 class I
	ENSMUSG00000001802	0.994938	0.00185	Lrp3	low density lipoprotein receptor-related protein 3
	ENSMUSG00000002504	1.00996	0.00345	Slc9a3r2	solute carrier family 9 (sodium/hydrogen exchanger), member 3 regulator 2
	ENSMUSG00000002781	0.883389	0.0278	Tmem143	transmembrane protein 143
	ENSMUSG00000002910	0.935373	0.0032	Arrdc2	arrestin domain containing 2
	ENSMUSG00000003477	1.18273	5e-05	Inmt	indolethylamine N-methyltransferase
	ENSMUSG00000003814	0.692909	0.036	Calr	calreticulin
	ENSMUSG00000004105	1.07022	0.0309	Angptl2	angiopoietin-like 2
	ENSMUSG00000004462	1.05805	0.0021	Tbccd1	TBCC domain containing 1
	ENSMUSG00000004500	1.43449	0.00045	Zfp324	zinc finger protein 324
	ENSMUSG00000004947	0.776797	0.04335	Dtx2	deltex 2, E3 ubiquitin ligase
	ENSMUSG00000005373	0.893792	0.0356	Mlxipl	MLX interacting protein-like
	ENSMUSG00000005672	1.51764	0.00475	Kit	kit oncogene
	ENSMUSG00000005674	1.59056	0.02965	Tomm40l	translocase of outer mitochondrial membrane 40 homolog-like (yeast)
	ENSMUSG00000005836	0.775191	0.04375	Gata6	GATA binding protein 6
	ENSMUSG00000005949	0.781281	0.0484	Ctns	cystinosis, nephropathic
	ENSMUSG00000008035	1.2403	0.0232	Mid1ip1	Mid1 interacting protein 1 (gastrulation specific G12-like (zebrafish))
	ENSMUSG00000008206	1.27753	0.01995	Cers4	ceramide synthase 4
	ENSMUSG00000008307	1.95103	0.03695	1700109H08Rik	RIKEN cDNA 1700109H08 gene
	ENSMUSG00000008604	0.812181	0.00345	Ubqln4	ubiquilin 4
	ENSMUSG00000008859	0.754421	0.0492	Rala	v-ral simian leukemia viral oncogene A (ras related)
	ENSMUSG00000009092	4.98554	0.00075	Derl3	Der1-like domain family, member 3
	ENSMUSG00000009378	0.935339	0.00225	Slc16a12	solute carrier family 16 (monocarboxylic acid transporters), member 12
	ENSMUSG00000009549	0.847698	0.0154	Srp14	signal recognition particle 14
	ENSMUSG00000009563	1.22263	0.0188	Tor2a	torsin family 2, member A
	ENSMUSG00000012428	0.970769	0.00045	Steap4	STEAP family member 4
	ENSMUSG00000014905	1.03191	0.03585	Dnajb9	DnaJ heat shock protein family (Hsp40) member B9
	ENSMUSG00000015468	0.823356	0.04595	Notch4	notch 4
	ENSMUSG00000017485	1.02905	0.03435	Top2b	topoisomerase (DNA) II beta
	ENSMUSG00000018401	0.658969	0.0167	Mtmr4	myotubularin related protein 4
	ENSMUSG00000018593	1.00094	0.0193	Sparc	secreted acidic cysteine rich glycoprotein
	ENSMUSG00000019189	0.92806	0.04135	Rnf145	ring finger protein 145
	ENSMUSG00000019528	2.60317	5e-05	Gyg	glycogenin
	ENSMUSG00000019906	1.4147	5e-05	Lin7a	lin-7 homolog A (C. elegans)
	ENSMUSG00000019935	1.56616	0.0002	Slc17a8	solute carrier family 17 (sodium-dependent inorganic phosphate cotransporter), member 8
	ENSMUSG00000019944	1.02878	0.03985	Rhobtb1	Rho-related BTB domain containing 1
	ENSMUSG00000019947	0.644176	0.0324	Arid5b	AT rich interactive domain 5B (MRF1-like)
	ENSMUSG00000019948	0.77049	0.0333	Actr6	ARP6 actin-related protein 6
	ENSMUSG00000020100	1.76172	0.0131	Slc29a3	solute carrier family 29 (nucleoside transporters), member 3
	ENSMUSG00000020160	1.20734	0.00585	Meis1	Meis homeobox 1
	ENSMUSG00000020262	0.767396	0.02465	Adarb1	adenosine deaminase, RNA-specific, B1
	ENSMUSG00000020326	1.05229	0.02765	Ccng1	cyclin G1
	ENSMUSG00000020334	1.28443	0.025	Slc22a4	solute carrier family 22 (organic cation transporter), member 4
	ENSMUSG00000020364	1.13509	0.00825	Zfp354a	zinc finger protein 354A
	ENSMUSG00000020440	0.753255	0.04785	Arf5	ADP-ribosylation factor 5
	ENSMUSG00000020455	0.64677	0.03625	Trim11	tripartite motif-containing 11
	ENSMUSG00000020538	1.62966	0.0007	Srebf1	sterol regulatory element binding transcription factor 1
	ENSMUSG00000020571	1.27668	5e-05	Pdia6	protein disulfide isomerase associated 6
	ENSMUSG00000020593	2.1275	5e-05	Lpin1	lipin 1
	ENSMUSG00000020623	1.72066	0.0003	Map2k6	mitogen-activated protein kinase kinase 6
	ENSMUSG00000020669	1.51535	0.00075	Sh3yl1	Sh3 domain YSC-like 1
	ENSMUSG00000020672	1.70454	0.00035	Sntg2	syntrophin, gamma 2
	ENSMUSG00000020733	0.767693	0.00525	Slc9a3r1	solute carrier family 9 (sodium/hydrogen exchanger), member 3 regulator 1
	ENSMUSG00000020873	1.48065	5e-05	Slc35b1	solute carrier family 35, member B1
	ENSMUSG00000020889	1.03651	0.00055	Nr1d1	nuclear receptor subfamily 1, group D, member 1
	ENSMUSG00000020893	0.880977	0.0328	Per1	period circadian clock 1
	ENSMUSG00000020964	0.883485	0.04965	Sel1l	sel-1 suppressor of lin-12-like (C. elegans)
	ENSMUSG00000021133	0.782048	0.00985	4933426M11Rik
	ENSMUSG00000021495	0.620309	0.018	Fam193b	family with sequence similarity 193, member B
	ENSMUSG00000021510	1.11009	0.0006	A530054K11Rik
	ENSMUSG00000021597	1.80613	0.00095	Ankrd32
	ENSMUSG00000021671	0.827987	0.0266	Poc5	POC5 centriolar protein
	ENSMUSG00000021738	0.658157	0.01505	Atxn7	ataxin 7
	ENSMUSG00000021767	0.79552	0.0213	Kat6b	K(lysine) acetyltransferase 6B
	ENSMUSG00000021779	0.585113	0.0424	Thrb	thyroid hormone receptor beta
	ENSMUSG00000022032	2.53144	5e-05	Scara5	scavenger receptor class A, member 5
	ENSMUSG00000022136	0.671169	0.01565	Dnajc3	DnaJ heat shock protein family (Hsp40) member C3
	ENSMUSG00000022218	0.975846	0.01765	Tgm1	transglutaminase 1, K polypeptide
	ENSMUSG00000022353	1.24787	5e-05	Mtss1	metastasis suppressor 1
	ENSMUSG00000022389	1.11985	0.0292	Tef	thyrotroph embryonic factor
	ENSMUSG00000022508	1.63987	5e-05	Bcl6	B cell leukemia/lymphoma 6
	ENSMUSG00000022707	0.998144	0.0006	Gbe1	glucan (1,4-alpha-), branching enzyme 1
	ENSMUSG00000022760	1.19203	0.0393	Thap7	THAP domain containing 7
	ENSMUSG00000022769	2.16143	5e-05	Sdf2l1	stromal cell-derived factor 2-like 1
	ENSMUSG00000022822	1.18599	0.0178	Abcc5	ATP-binding cassette, sub-family C (CFTR/MRP), member 5
	ENSMUSG00000022858	0.882263	0.01505	Tra2b	transformer 2 beta homolog (Drosophila)
	ENSMUSG00000023070	0.863574	0.0014	Rgn	regucalcin
	ENSMUSG00000023073	1.47665	0.00065	Slc10a2	solute carrier family 10, member 2
	ENSMUSG00000023243	0.650453	0.03075	Kcnk5	potassium channel, subfamily K, member 5
	ENSMUSG00000023272	2.08886	5e-05	Creld2	cysteine-rich with EGF-like domains 2
	ENSMUSG00000023805	0.983193	0.0137	Synj2	synaptojanin 2
	ENSMUSG00000023892	1.11965	0.0072	Zfp51	zinc finger protein 51
	ENSMUSG00000023963	1.08473	0.0007	Cyp39a1	cytochrome P450, family 39, subfamily a, polypeptide 1
	ENSMUSG00000023980	0.837846	0.0121	Taf8	TATA-box binding protein associated factor 8
	ENSMUSG00000023990	1.09363	0.00375	Tfeb	transcription factor EB
	ENSMUSG00000024014	1.22328	0.0006	Pim1	proviral integration site 1
	ENSMUSG00000024140	0.64659	0.02035	Epas1	endothelial PAS domain protein 1
	ENSMUSG00000024220	0.990013	0.0439	Zfp523	zinc finger protein 523
	ENSMUSG00000024222	1.07872	0.04235	Fkbp5	FK506 binding protein 5
	ENSMUSG00000024292	1.03085	0.00035	Cyp4f14	cytochrome P450, family 4, subfamily f, polypeptide 14
	ENSMUSG00000024357	0.612831	0.0318	Sil1	endoplasmic reticulum chaperone SIL1 homolog (S. cerevisiae)
	ENSMUSG00000024424	0.920007	0.01045	Ttc39c	tetratricopeptide repeat domain 39C
	ENSMUSG00000024427	1.29227	0.00125	Spry4	sprouty homolog 4 (Drosophila)
	ENSMUSG00000024431	0.75784	0.0285	Nr3c1	nuclear receptor subfamily 3, group C, member 1
	ENSMUSG00000024451	0.74622	0.0087	Arap3	ArfGAP with RhoGAP domain, ankyrin repeat and PH domain 3
	ENSMUSG00000024561	0.855573	0.00225	Mbd1	methyl-CpG binding domain protein 1
	ENSMUSG00000024590	1.11556	0.0495	Lmnb1	lamin B1
	ENSMUSG00000024694	1.8045	5e-05	Keg1	kidney expressed gene 1
	ENSMUSG00000024807	1.79617	0.0021	Syvn1	synovial apoptosis inhibitor 1, synoviolin
	ENSMUSG00000025173	1.05112	0.03475	Wdr45b	WD repeat domain 45B
	ENSMUSG00000025375	1.523	5e-05	Aatk	apoptosis-associated tyrosine kinase
	ENSMUSG00000025396	0.626603	0.042	Hsd17b6	hydroxysteroid (17-beta) dehydrogenase 6
	ENSMUSG00000025405	0.785928	0.00255	Inhbc	inhibin beta-C
	ENSMUSG00000025574	1.78395	0.0251	Tk1	thymidine kinase 1
	ENSMUSG00000025578	1.12413	0.04365	Cbx8	chromobox 8
	ENSMUSG00000025742	1.28496	0.04315	Prps2	phosphoribosyl pyrophosphate synthetase 2
	ENSMUSG00000025823	0.89578	0.002	Pdia4	protein disulfide isomerase associated 4
	ENSMUSG00000025887	1.20218	0.0214	Casp12	caspase 12
	ENSMUSG00000025934	0.645397	0.03835	Gsta3	glutathione S-transferase, alpha 3
	ENSMUSG00000025981	0.825615	0.0052	Coq10b	coenzyme Q10B
	ENSMUSG00000025993	0.585005	0.0274	Slc40a1	solute carrier family 40 (iron-regulated transporter), member 1
	ENSMUSG00000026043	0.913954	0.00355	Col3a1	collagen, type III, alpha 1
	ENSMUSG00000026072	2.02237	5e-05	Il1r1	interleukin 1 receptor, type I
	ENSMUSG00000026103	1.13277	0.03945	Gls	glutaminase
	ENSMUSG00000026154	1.22278	0.03405	1110058L19Rik
	ENSMUSG00000026238	0.71198	0.01415	Ptma	prothymosin alpha
	ENSMUSG00000026249	0.896357	0.00935	Serpine2	serine (or cysteine) peptidase inhibitor, clade E, member 2
	ENSMUSG00000026259	0.616293	0.0314	Ngef	neuronal guanine nucleotide exchange factor
	ENSMUSG00000026333	1.27253	0.02375	Gin1	gypsy retrotransposon integrase 1
	ENSMUSG00000026475	2.65152	5e-05	Rgs16	regulator of G-protein signaling 16
	ENSMUSG00000026669	0.969083	0.0101	Mcm10	minichromosome maintenance 10 replication initiation factor
	ENSMUSG00000026688	0.918978	0.03515	Mgst3	microsomal glutathione S-transferase 3
	ENSMUSG00000026773	1.64083	5e-05	Pfkfb3	6-phosphofructo-2-kinase/fructose-2,6-biphosphatase 3
	ENSMUSG00000026839	1.33035	0.0006	Upp2	uridine phosphorylase 2
	ENSMUSG00000026864	1.17359	0.001	Hspa5	heat shock protein 5
	ENSMUSG00000026883	1.0405	0.0335	Dab2ip	disabled 2 interacting protein
	ENSMUSG00000026988	1.13403	0.01405	Wdsub1	WD repeat, SAM and U-box domain containing 1
	ENSMUSG00000027016	1.3025	0.00325	Zfp385b	zinc finger protein 385B
	ENSMUSG00000027035	0.906097	0.03615	Cers6	ceramide synthase 6
	ENSMUSG00000027248	0.974161	0.01925	Pdia3	protein disulfide isomerase associated 3
	ENSMUSG00000027261	0.739412	0.0253	Hao1	hydroxyacid oxidase 1, liver
	ENSMUSG00000027514	1.09242	0.0374	Zbp1	Z-DNA binding protein 1
	ENSMUSG00000027559	1.25553	0.00025	Car3	carbonic anhydrase 3
	ENSMUSG00000027808	0.642103	0.0403	Serp1	stress-associated endoplasmic reticulum protein 1
	ENSMUSG00000027822	0.907549	0.0041	Slc33a1	solute carrier family 33 (acetyl-CoA transporter), member 1
	ENSMUSG00000027947	1.15893	0.0001	Il6ra	interleukin 6 receptor, alpha
	ENSMUSG00000027953	1.00851	0.0167	Slc50a1	solute carrier family 50 (sugar transporter), member 1
	ENSMUSG00000027954	0.968212	0.00185	Efna1	ephrin A1
	ENSMUSG00000027983	0.912169	0.0035	Cyp2u1	cytochrome P450, family 2, subfamily u, polypeptide 1
	ENSMUSG00000028108	0.634725	0.0329	Ecm1	extracellular matrix protein 1
	ENSMUSG00000028184	0.669527	0.0294	Lphn2
	ENSMUSG00000028413	0.896781	0.021	B4galt1	UDP-Gal:betaGlcNAc beta 1,4- galactosyltransferase, polypeptide 1
	ENSMUSG00000028479	0.775653	0.01555	Gne	glucosamine (UDP-N-acetyl)-2-epimerase/N-acetylmannosamine kinase
	ENSMUSG00000028542	0.855056	0.04245	Slc6a9	solute carrier family 6 (neurotransmitter transporter, glycine), member 9
	ENSMUSG00000028793	0.748463	0.03245	Rnf19b	ring finger protein 19B
	ENSMUSG00000028957	1.33882	0.0017	Per3	period circadian clock 3
	ENSMUSG00000028978	0.82541	0.0174	Nos3	nitric oxide synthase 3, endothelial cell
	ENSMUSG00000029053	0.81896	0.0469	Prkcz	protein kinase C, zeta
	ENSMUSG00000029290	1.88954	0.04945	Zfp326	zinc finger protein 326
	ENSMUSG00000029322	1.10557	0.03195	Plac8	placenta-specific 8
	ENSMUSG00000029406	0.742599	0.04295	Pitpnm2	phosphatidylinositol transfer protein, membrane-associated 2
	ENSMUSG00000029482	2.15614	5e-05	Aacs	acetoacetyl-CoA synthetase
	ENSMUSG00000029804	0.982903	0.0298	Herc3	hect domain and RLD 3
	ENSMUSG00000029833	0.878614	0.0067	Trim24	tripartite motif-containing 24
	ENSMUSG00000029840	0.682629	0.0134	Mtpn	myotrophin
	ENSMUSG00000030102	0.632678	0.02095	Itpr1	inositol 1,4,5-trisphosphate receptor 1
	ENSMUSG00000030103	1.23726	0.0219	Bhlhe40	basic helix-loop-helix family, member e40
	ENSMUSG00000030245	3.1751	0.0021	Golt1b	golgi transport 1B
	ENSMUSG00000030340	1.00443	0.01625	Scnn1a	sodium channel, nonvoltage-gated 1 alpha
	ENSMUSG00000030386	1.1577	0.0014	Zfp606	zinc finger protein 606
	ENSMUSG00000030431	0.808164	0.02975	Tmem238	transmembrane protein 238
	ENSMUSG00000030562	0.712469	0.0407	Nox4	NADPH oxidase 4
	ENSMUSG00000030782	1.24857	0.00455	Tgfb1i1	transforming growth factor beta 1 induced transcript 1
	ENSMUSG00000030970	1.41967	0.04695	Ctbp2	C-terminal binding protein 2
	ENSMUSG00000031016	1.3547	0.00175	Wee1	WEE 1 homolog 1 (S. pombe)
	ENSMUSG00000031198	2.91232	0.02655	Fundc2	FUN14 domain containing 2
	ENSMUSG00000031232	1.07477	0.00655	Magt1	magnesium transporter 1
	ENSMUSG00000031271	1.38506	0.00105	Serpina7	serine (or cysteine) peptidase inhibitor, clade A (alpha-1 antiproteinase, antitrypsin), member 7
	ENSMUSG00000031355	1.15627	0.0255	Arhgap6	Rho GTPase activating protein 6
	ENSMUSG00000031375	0.991272	0.01815	Bgn	biglycan
	ENSMUSG00000031431	0.669651	0.0266	Tsc22d3	TSC22 domain family, member 3
	ENSMUSG00000031478	1.37189	0.00865	Nek3	NIMA (never in mitosis gene a)-related expressed kinase 3
	ENSMUSG00000031508	0.944113	0.01235	Ankrd10	ankyrin repeat domain 10
	ENSMUSG00000031595	1.0529	0.02805	Pdgfrl	platelet-derived growth factor receptor-like
	ENSMUSG00000031613	0.837756	0.00265	Hpgd	hydroxyprostaglandin dehydrogenase 15 (NAD)
	ENSMUSG00000031645	0.716332	0.013	F11	coagulation factor XI
	ENSMUSG00000031706	0.626251	0.0431	Rfx1	regulatory factor X, 1 (influences HLA class II expression)
	ENSMUSG00000031767	0.911053	0.01115	Nudt7	nudix (nucleoside diphosphate linked moiety X)-type motif 7
	ENSMUSG00000031770	0.937799	0.046	Herpud1	homocysteine-inducible, endoplasmic reticulum stress-inducible, ubiquitin-like domain member 1
	ENSMUSG00000031833	0.719622	0.007	Mast3	microtubule associated serine/threonine kinase 3
	ENSMUSG00000032010	1.09376	0.03315	Usp2	ubiquitin specific peptidase 2
	ENSMUSG00000032115	1.34427	5e-05	Hyou1	hypoxia up-regulated 1
	ENSMUSG00000032231	0.909236	0.03685	Anxa2	annexin A2
	ENSMUSG00000032294	1.17314	0.0016	Pkm	pyruvate kinase, muscle
	ENSMUSG00000032311	1.23541	0.00665	Nrg4	neuregulin 4
	ENSMUSG00000032353	1.17758	0.01085	Tmed3	transmembrane emp24 domain containing 3
	ENSMUSG00000032383	0.653193	0.01945	Ppib	peptidylprolyl isomerase B
	ENSMUSG00000032525	0.637498	0.03245	Nktr	natural killer tumor recognition sequence
	ENSMUSG00000032741	1.00366	0.00155	Tpcn1	two pore channel 1
	ENSMUSG00000032786	0.949225	0.0474	Alas1	aminolevulinic acid synthase 1
	ENSMUSG00000033021	0.7107	0.03025	Gmppa	GDP-mannose pyrophosphorylase A
	ENSMUSG00000033543	0.867142	0.0195	Gtf2a2	general transcription factor II A, 2
	ENSMUSG00000033871	1.17139	0.0004	Ppargc1b	peroxisome proliferative activated receptor, gamma, coactivator 1 beta
	ENSMUSG00000033943	0.872839	0.0149	Mga	MAX gene associated
	ENSMUSG00000034168	0.822628	0.00755	Irf2bpl	interferon regulatory factor 2 binding protein-like
	ENSMUSG00000034220	0.767183	0.01375	Gpc1	glypican 1
	ENSMUSG00000034349	1.20381	0.04125	Smc4	structural maintenance of chromosomes 4
	ENSMUSG00000034450	0.624806	0.0311	Gulo	gulonolactone (L-) oxidase
	ENSMUSG00000034645	0.740397	0.03935	Zyg11a	zyg-11 family member A, cell cycle regulator
	ENSMUSG00000034892	0.645666	0.03015	Rps29	ribosomal protein S29
	ENSMUSG00000035064	1.24207	0.0118	Eef2k	eukaryotic elongation factor-2 kinase
	ENSMUSG00000035133	1.15427	0.00075	Arhgap5	Rho GTPase activating protein 5
	ENSMUSG00000035181	0.623199	0.0349	Heatr5a	HEAT repeat containing 5A
	ENSMUSG00000035372	0.70874	0.0263	1810055G02Rik	RIKEN cDNA 1810055G02 gene
	ENSMUSG00000035451	0.714018	0.0144	Foxa1	forkhead box A1
	ENSMUSG00000035686	2.87389	5e-05	Thrsp	thyroid hormone responsive
	ENSMUSG00000035692	1.41019	0.0178	Isg15	ISG15 ubiquitin-like modifier
	ENSMUSG00000035828	0.887088	0.0013	Pim3	proviral integration site 3
	ENSMUSG00000035845	1.01114	0.0491	Alg12	asparagine-linked glycosylation 12 (alpha-1,6-mannosyltransferase)
	ENSMUSG00000035992	0.585754	0.046	Fnip1	folliculin interacting protein 1
	ENSMUSG00000036040	0.860065	0.0198	Adamtsl2	ADAMTS-like 2
	ENSMUSG00000036054	0.821484	0.00955	Sugp2	SURP and G patch domain containing 2
	ENSMUSG00000036083	0.788612	0.0069	Slc17a3	solute carrier family 17 (sodium phosphate), member 3
	ENSMUSG00000036216	1.28567	0.0013	Leap2	liver-expressed antimicrobial peptide 2
	ENSMUSG00000036534	0.927496	0.0431	Slc38a7	solute carrier family 38, member 7
	ENSMUSG00000036863	0.735019	0.01925	Syde2	synapse defective 1, Rho GTPase, homolog 2 (C. elegans)
	ENSMUSG00000036885	1.10903	0.00875	Arhgef26	Rho guanine nucleotide exchange factor (GEF) 26
	ENSMUSG00000036918	0.923549	0.015	Ttc7	tetratricopeptide repeat domain 7
	ENSMUSG00000037108	1.28758	0.0301	Zcwpw1	zinc finger, CW type with PWWP domain 1
	ENSMUSG00000037465	1.09291	0.00015	Klf10	Kruppel-like factor 10
	ENSMUSG00000037470	0.930352	0.0064	Uggt1	UDP-glucose glycoprotein glucosyltransferase 1
	ENSMUSG00000037583	0.743857	0.0127	Nr0b2	nuclear receptor subfamily 0, group B, member 2
	ENSMUSG00000037606	1.55032	0.01325	Osbpl5	oxysterol binding protein-like 5
	ENSMUSG00000037885	0.905194	0.0057	Stk35	serine/threonine kinase 35
	ENSMUSG00000037960	1.48099	0.0425	1110007C09Rik
	ENSMUSG00000038188	0.684186	0.01485	Scarf1	scavenger receptor class F, member 1
	ENSMUSG00000038241	0.721894	0.049	Cep250	centrosomal protein 250
	ENSMUSG00000038459	0.803943	0.01795	Abhd17c	abhydrolase domain containing 17C
	ENSMUSG00000038506	0.950409	0.04105	Dcun1d2	DCN1, defective in cullin neddylation 1, domain containing 2 (S. cerevisiae)
	ENSMUSG00000038508	1.22086	0.0108	Gdf15	growth differentiation factor 15
	ENSMUSG00000038550	2.51739	0.00345	Gm129
	ENSMUSG00000038599	1.60784	0.00165	Capn8	calpain 8
	ENSMUSG00000038648	1.54517	0.0107	Creb3l2	cAMP responsive element binding protein 3-like 2
	ENSMUSG00000038695	0.614374	0.041	Josd2	Josephin domain containing 2
	ENSMUSG00000038764	1.07384	0.02315	Ptpn3	protein tyrosine phosphatase, non-receptor type 3
	ENSMUSG00000038894	0.661321	0.02145	Irs2	insulin receptor substrate 2
	ENSMUSG00000038991	0.967142	0.0005	Txndc5	thioredoxin domain containing 5
	ENSMUSG00000039114	0.877474	0.023	Nrn1	neuritin 1
	ENSMUSG00000039519	0.772951	0.01725	Cyp7b1	cytochrome P450, family 7, subfamily b, polypeptide 1
	ENSMUSG00000039648	0.61922	0.04125	Ccbl1
	ENSMUSG00000039671	0.649342	0.0259	Zmynd8	zinc finger, MYND-type containing 8
	ENSMUSG00000039701	0.714454	0.02975	Usp53	ubiquitin specific peptidase 53
	ENSMUSG00000039741	0.895676	0.01765	Bahcc1	BAH domain and coiled-coil containing 1
	ENSMUSG00000039917	0.875333	0.0384	Rhbdd2	rhomboid domain containing 2
	ENSMUSG00000040017	1.30828	5e-05	Saa4	serum amyloid A 4
	ENSMUSG00000040127	1.33646	5e-05	Sdr9c7	4short chain dehydrogenase/reductase family 9C, member 7
	ENSMUSG00000040181	0.654378	0.0314	Fmo1	flavin containing monooxygenase 1
	ENSMUSG00000040213	0.712216	0.0108	Ccbl2
	ENSMUSG00000040253	0.949535	0.0057	Gbp7	guanylate binding protein 7
	ENSMUSG00000040350	1.32073	0.0025	Trim7	tripartite motif-containing 7
	ENSMUSG00000040584	2.88874	0.00425	Abcb1a	ATP-binding cassette, sub-family B (MDR/TAP), member 1A
	ENSMUSG00000040659	0.959576	0.0013	Efhd2	EF hand domain containing 2
	ENSMUSG00000040660	4.89726	5e-05	Cyp2b9	cytochrome P450, family 2, subfamily b, polypeptide 9
	ENSMUSG00000040841	1.27491	0.00135	Six5	sine oculis-related homeobox 5
	ENSMUSG00000040952	0.843576	0.0354	Rps19	ribosomal protein S19
	ENSMUSG00000041132	1.18437	0.0006	N4bp2l1	NEDD4 binding protein 2-like 1
	ENSMUSG00000041237	1.2875	0.008	Pklr	pyruvate kinase liver and red blood cell
	ENSMUSG00000041324	0.944982	0.0084	Inhba	inhibin beta-A
	ENSMUSG00000041417	0.832091	0.00205	Pik3r1	phosphatidylinositol 3-kinase, regulatory subunit, polypeptide 1 (p85 alpha)
	ENSMUSG00000041471	0.993431	0.0003	Fam35a	family with sequence similarity 35, member A
	ENSMUSG00000041567	1.77877	5e-05	Serpina12	serine (or cysteine) peptidase inhibitor, clade A (alpha-1 antiproteinase, antitrypsin), member 12
	ENSMUSG00000041698	1.78662	5e-05	Slco1a1	solute carrier organic anion transporter family, member 1a1
	ENSMUSG00000042063	1.34717	0.0442	Zfp386	zinc finger protein 386 (Kruppel-like)
	ENSMUSG00000042190	1.30353	0.03915	Cmklr1	chemokine-like receptor 1
	ENSMUSG00000042628	0.588471	0.02355	Zfyve1	zinc finger, FYVE domain containing 1
	ENSMUSG00000042680	0.773838	0.0042	Garem	GRB2 associated, regulator of MAPK1
	ENSMUSG00000042694	1.04166	0.03155	Obfc1	oligonucleotide/oligosaccharide-binding fold containing 1
	ENSMUSG00000042747	0.632691	0.0471	Krtcap2	keratinocyte associated protein 2
	ENSMUSG00000042834	3.03644	0.0061	Nrep	neuronal regeneration related protein
	ENSMUSG00000042870	1.02716	0.0051	Tom1	target of myb1 trafficking protein
	ENSMUSG00000042978	0.858	0.01065	Sbk1	SH3-binding kinase 1
	ENSMUSG00000043013	1.64083	0.01785	Onecut1	one cut domain, family member 1
	ENSMUSG00000043019	0.633422	0.0294	Edem3	ER degradation enhancer, mannosidase alpha-like 3
	ENSMUSG00000044026	0.798116	0.02685	Slc35g1	solute carrier family 35, member G1
	ENSMUSG00000044167	0.931008	0.00115	Foxo1	forkhead box O1
	ENSMUSG00000044345	1.13054	0.0005	Marveld1	MARVEL (membrane-associating) domain containing 1
	ENSMUSG00000044361	0.805324	0.01205	BC024139	cDNA sequence BC024139
	ENSMUSG00000044501	2.54095	5e-05	Zfp758	zinc finger protein 758
	ENSMUSG00000044562	0.97243	0.0073	Rasip1	Ras interacting protein 1
	ENSMUSG00000044937	0.796163	0.04955	BC030307
	ENSMUSG00000045092	0.631255	0.04555	S1pr1	sphingosine-1-phosphate receptor 1
	ENSMUSG00000045216	0.602602	0.02885	Hs6st1	heparan sulfate 6-O-sulfotransferase 1
	ENSMUSG00000045294	0.671741	0.02375	Insig1	insulin induced gene 1
	ENSMUSG00000045312	1.42209	0.01495	Lhfpl2	lipoma HMGIC fusion partner-like 2
	ENSMUSG00000045392	1.60872	0.0283	Olfr1033	olfactory receptor 1033
	ENSMUSG00000045441	0.943715	0.0009	Gprin3	GPRIN family member 3
	ENSMUSG00000045752	0.818469	0.04185	Tssc4	tumor-suppressing subchromosomal transferable fragment 4
	ENSMUSG00000045767	0.678119	0.0385	B230219D22Rik	RIKEN cDNA B230219D22 gene
	ENSMUSG00000045817	0.873767	0.00205	Zfp36l2	zinc finger protein 36, C3H type-like 2
	ENSMUSG00000045991	0.71882	0.0103	Onecut2	one cut domain, family member 2
	ENSMUSG00000046070	0.585709	0.03115	Igfals	insulin-like growth factor binding protein, acid labile subunit
	ENSMUSG00000046179	1.59366	0.0077	E2f8	E2F transcription factor 8
	ENSMUSG00000046230	0.985157	0.00725	Vps13a	vacuolar protein sorting 13A
	ENSMUSG00000046312	0.59716	0.03885	AI464131	expressed sequence AI464131
	ENSMUSG00000046447	0.794942	0.0059	Camk2n1	calcium/calmodulin-dependent protein kinase II inhibitor 1
	ENSMUSG00000046470	1.34964	0.00995	Sox18	SRY (sex determining region Y)-box 18
	ENSMUSG00000047036	0.618486	0.0186	Zfp445	zinc finger protein 445
	ENSMUSG00000047123	0.776258	0.01145	Ticam1	toll-like receptor adaptor molecule 1
	ENSMUSG00000047141	0.748872	0.0183	Zfp654	zinc finger protein 654
	ENSMUSG00000047213	1.04197	0.0012	Ythdf3	YTH domain family 3
	ENSMUSG00000047728	0.700713	0.01065	BC025446	cDNA sequence BC025446
	ENSMUSG00000047735	1.06457	0.001	Samd9l	sterile alpha motif domain containing 9-like
	ENSMUSG00000048280	1.12841	5e-05	Zfp738	zinc finger protein 738
	ENSMUSG00000048706	0.691216	0.0255	Lurap1l	leucine rich adaptor protein 1-like
	ENSMUSG00000049164	1.00507	0.00265	Zfp518a	zinc finger protein 518A
	ENSMUSG00000049232	0.874036	0.0198	Tigd2	tigger transposable element derived 2
	ENSMUSG00000049580	1.3558	5e-05	Tsku	tsukushi, small leucine rich proteoglycan
	ENSMUSG00000049657	0.772423	0.0168	Zbtb5	zinc finger and BTB domain containing 5
	ENSMUSG00000050069	1.09715	0.00805	Grem2	gremlin 2, DAN family BMP antagonist
	ENSMUSG00000050541	0.705058	0.01585	Adra1b	adrenergic receptor, alpha 1b
	ENSMUSG00000051627	0.783776	0.0132	Hist1h1e	histone cluster 1, H1e
	ENSMUSG00000051721	0.953949	0.01	BC068281	cDNA sequence BC068281
	ENSMUSG00000051910	0.692583	0.04075	Sox6	SRY (sex determining region Y)-box 6
	ENSMUSG00000052117	1.09259	0.00165	D630039A03Rik	RIKEN cDNA D630039A03 gene
	ENSMUSG00000052435	1.401	0.0005	Cebpe	CCAAT/enhancer binding protein (C/EBP), epsilon
	ENSMUSG00000052562	0.77632	0.01315	Slc22a30	solute carrier family 22, member 30
	ENSMUSG00000052748	1.21211	0.02175	Swt1	SWT1 RNA endoribonuclease homolog (S. cerevisiae)
	ENSMUSG00000052957	1.16196	0.00665	Gas1	growth arrest specific 1
	ENSMUSG00000053091	1.35525	0.01915	Lins
	ENSMUSG00000053334	0.877826	0.02455	Ficd	FIC domain containing
	ENSMUSG00000053347	1.30838	0.00215	Zfp943	zinc finger prtoein 943
	ENSMUSG00000053846	0.971548	0.00035	Lipg	lipase, endothelial
	ENSMUSG00000054263	1.61746	0.00745	Lifr	leukemia inhibitory factor receptor
	ENSMUSG00000055435	0.661213	0.02755	Maf	avian musculoaponeurotic fibrosarcoma oncogene homolog
	ENSMUSG00000055480	0.890876	0.01365	Zfp458	zinc finger protein 458
	ENSMUSG00000055866	1.11104	0.0004	Per2	period circadian clock 2
	ENSMUSG00000056260	1.17902	0.00595	Lrif1	ligand dependent nuclear receptor interacting factor 1
	ENSMUSG00000056313	1.0631	0.0004	1810011O10Rik	RIKEN cDNA 1810011O10 gene
	ENSMUSG00000056612	0.983517	0.036	Ppp1r14b	protein phosphatase 1, regulatory (inhibitor) subunit 14B
	ENSMUSG00000057068	1.04079	0.0389	Fam47e	family with sequence similarity 47, member E
	ENSMUSG00000057069	1.72894	5e-05	Ero1lb	ERO1-like beta (S. cerevisiae)
	ENSMUSG00000057103	0.733846	0.00935	Cml1
	ENSMUSG00000057346	0.84831	0.011	Apol9a	apolipoprotein L 9a
	ENSMUSG00000057396	1.09338	0.00235	Zfp759	zinc finger protein 759
	ENSMUSG00000057409	0.776672	0.04695	Zfp53	zinc finger protein 53
	ENSMUSG00000057637	0.877522	0.04265	Prdm2	PR domain containing 2, with ZNF domain
	ENSMUSG00000057842	0.902073	0.03775	Zfp595	zinc finger protein 595
	ENSMUSG00000057894	1.02271	0.0097	Zfp329	zinc finger protein 329
	ENSMUSG00000058152	1.00943	0.00175	Chsy3	chondroitin sulfate synthase 3
	ENSMUSG00000058709	0.62413	0.03555	Egln2	egl-9 family hypoxia-inducible factor 2
	ENSMUSG00000058748	0.807645	0.04945	Zfp958	zinc finger protein 958
	ENSMUSG00000059005	1.21796	0.03825	Hnrnpa3	heterogeneous nuclear ribonucleoprotein A3
	ENSMUSG00000059824	1.92713	0.00865	Dbp	D site albumin promoter binding protein
	ENSMUSG00000060301	0.656887	0.01925	2610008E11Rik	RIKEN cDNA 2610008E11 gene
	ENSMUSG00000060613	1.45603	0.00015	Cyp2c70	cytochrome P450, family 2, subfamily c, polypeptide 70
	ENSMUSG00000060639	2.08454	0.0003	Hist1h4i	histone cluster 1, H4i
	ENSMUSG00000060807	1.10629	0.0002	Serpina6	serine (or cysteine) peptidase inhibitor, clade A, member 6
	ENSMUSG00000061111	1.04649	0.0123	Fam195b	family with sequence similarity 195, member B
	ENSMUSG00000061371	0.758003	0.03805	Zfp873	zinc finger protein 873
	ENSMUSG00000061615	1.96006	0.02745	Hist1h2ab	histone cluster 1, H2ab
	ENSMUSG00000061947	0.634119	0.0255	Serpina10	serine (or cysteine) peptidase inhibitor, clade A (alpha-1 antiproteinase, antitrypsin), member 10
	ENSMUSG00000062110	0.854749	0.02635	Scfd2	Sec1 family domain containing 2
	ENSMUSG00000062181	1.20088	0.0121	Ces3b	carboxylesterase 3B
	ENSMUSG00000062410	1.23473	0.00865	Hsd3b3	hydroxy-delta-5-steroid dehydrogenase, 3 beta- and steroid delta-isomerase 3
	ENSMUSG00000062421	1.97635	0.0067	Arf2	ADP-ribosylation factor 2
	ENSMUSG00000062515	1.33505	0.0098	Fabp4	fatty acid binding protein 4, adipocyte
	ENSMUSG00000062929	0.723756	0.0459	Cfl2	cofilin 2, muscle
	ENSMUSG00000063232	0.710011	0.02145	Serpina11	serine (or cysteine) peptidase inhibitor, clade A (alpha-1 antiproteinase, antitrypsin), member 11
	ENSMUSG00000063428	0.782342	0.0115	Ddo	D-aspartate oxidase
	ENSMUSG00000063445	1.2238	0.01335	Nmral1	NmrA-like family domain containing 1
	ENSMUSG00000063590	1.5447	0.0088	Slc22a28	solute carrier family 22, member 28
	ENSMUSG00000064215	0.941278	0.00525	Ifi27	interferon, alpha-inducible protein 27
	ENSMUSG00000064289	0.918314	0.04145	Tank	TRAF family member-associated Nf-kappa B activator
	ENSMUSG00000064354	0.84247	0.02795	mt-Co2
	ENSMUSG00000066042	1.34678	0.01945	Med18	mediator complex subunit 18
	ENSMUSG00000066153	0.712335	0.015	Mup21	major urinary protein 21
	ENSMUSG00000066640	0.961767	0.0354	Fbxl18	F-box and leucine-rich repeat protein 18
	ENSMUSG00000066687	1.04925	0.0002	Zbtb16	zinc finger and BTB domain containing 16
	ENSMUSG00000067071	0.868945	0.0165	Hes6	hairy and enhancer of split 6
	ENSMUSG00000067813	0.851626	0.0115	Xkr9	X-linked Kx blood group related 9
	ENSMUSG00000067825	0.860561	0.0466	Pex26	peroxisomal biogenesis factor 26
	ENSMUSG00000068083	1.04786	0.00125	Cyp2d40	cytochrome P450, family 2, subfamily d, polypeptide 40
	ENSMUSG00000068220	1.50695	0.0015	Lgals1	lectin, galactose binding, soluble 1
	ENSMUSG00000068394	0.615527	0.0496	Cep152	centrosomal protein 152
	ENSMUSG00000068457	0.675422	0.04665	Uty	ubiquitously transcribed tetratricopeptide repeat gene, Y chromosome
	ENSMUSG00000068742	0.679258	0.0253	Cry2	cryptochrome 2 (photolyase-like)
	ENSMUSG00000068877	3.44043	0.0003	Selenbp2	selenium binding protein 2
	ENSMUSG00000069267	3.49899	0.01375	Hist1h3b	histone cluster 1, H3b
	ENSMUSG00000070436	1.69609	5e-05	Serpinh1	serine (or cysteine) peptidase inhibitor, clade H, member 1
	ENSMUSG00000070576	1.07791	0.0019	Mn1	meningioma 1
	ENSMUSG00000070661	1.01181	0.0126	Rnf186	ring finger protein 186
	ENSMUSG00000070808	0.946657	0.00135	Gltscr1	glioma tumor suppressor candidate region gene 1
	ENSMUSG00000071180	0.868982	0.0337	Smim15	small integral membrane protein 15
	ENSMUSG00000071267	1.77316	5e-05	Zfp942	zinc finger protein 942
	ENSMUSG00000071369	1.18616	0.00725	Map3k5	mitogen-activated protein kinase kinase kinase 5
	ENSMUSG00000071379	0.906059	0.02795	Hpcal1	hippocalcin-like 1
	ENSMUSG00000072704	0.67446	0.0354	2700089E24Rik
	ENSMUSG00000073563	0.761759	0.0125	Csnk1g3	casein kinase 1, gamma 3
	ENSMUSG00000073565	1.75831	0.00015	Prr16	proline rich 16
	ENSMUSG00000073600	0.709217	0.04405	Prob1	proline rich basic protein 1
	ENSMUSG00000073700	0.845937	0.00555	Klhl21	kelch-like 21
	ENSMUSG00000074166	0.929587	0.03585	AW146154	expressed sequence AW146154
	ENSMUSG00000074170	0.969756	0.0089	Plekhf1	pleckstrin homology domain containing, family F (with FYVE domain) member 1
	ENSMUSG00000074405	0.675458	0.0271	Zfp865	zinc finger protein 865
	ENSMUSG00000074622	0.69629	0.0143	Mafb	v-maf musculoaponeurotic fibrosarcoma oncogene family, protein B (avian)
	ENSMUSG00000074676	3.86186	0.0186	Foxs1	forkhead box S1
	ENSMUSG00000074829	0.841905	0.03155	2010315B03Rik	RIKEN cDNA 2010315B03 gene
	ENSMUSG00000074896	1.15258	0.011	Ifit3	interferon-induced protein with tetratricopeptide repeats 3
	ENSMUSG00000075517	1.0154	0.00255	Cyp2d37-ps	cytochrome P450, family 2, subfamily d, polypeptide 37, pseudogene
	ENSMUSG00000075543	0.754548	0.0497	Urad	ureidoimidazoline (2-oxo-4-hydroxy-4-carboxy-5) decarboxylase
	ENSMUSG00000075600	0.658525	0.04885	Zc3h3	zinc finger CCCH type containing 3
	ENSMUSG00000078234	1.43261	5e-05	Klhdc7a	kelch domain containing 7A
	ENSMUSG00000078435	1.10407	0.0102	AU041133	expressed sequence AU041133
	ENSMUSG00000078861	1.27991	0.01075	Zfp931	zinc finger protein 931
	ENSMUSG00000078866	1.30347	0.0002	Gm14420
	ENSMUSG00000078964	0.621264	0.0242	Ces1b	carboxylesterase 1B
	ENSMUSG00000079083	1.37931	0.00135	Jrkl	Jrk-like
	ENSMUSG00000079555	1.29078	0.0007	Haus3	HAUS augmin-like complex, subunit 3
	ENSMUSG00000085793	1.0441	0.0096	Lin52	lin-52 homolog (C. elegans)
	ENSMUSG00000085795	0.949004	0.0149	Zfp703	zinc finger protein 703
	ENSMUSG00000089857	2.59925	0.0065	Zfp882	zinc finger protein 882
	ENSMUSG00000090093	2.40942	0.0034	Gm14399	predicted gene 14399
	ENSMUSG00000090306	2.20977	5e-05	Adh6-ps1	alcohol dehydrogenase 6 (class V), pseudogene 1
	ENSMUSG00000090942	0.689953	0.0156	F830016B08Rik	RIKEN cDNA F830016B08 gene
	ENSMUSG00000091474	0.768465	0.01625	2610021A01Rik	RIKEN cDNA 2610021A01 gene
	ENSMUSG00000096433	2.0698	0.01295	Gm4944
	ENSMUSG00000096768	4.15586	0.0313	Erdr1	erythroid differentiation regulator 1
	ENSMUSG00000097061	1.18199	0.02	9330151L19Rik	RIKEN cDNA 9330151L19 gene
	ENSMUSG00000000127	-0.608558	0.0475	Fer	fer (fms/fps related) protein kinase
	ENSMUSG00000000278	-0.616501	0.04525	Scpep1	serine carboxypeptidase 1
	ENSMUSG00000000303	-1.17925	0.0033	Cdh1	cadherin 1
	ENSMUSG00000000555	-0.675123	0.01555	Itga5	integrin alpha 5 (fibronectin receptor alpha)
	ENSMUSG00000001270	-0.984664	0.03765	Ckb	creatine kinase, brain
	ENSMUSG00000001417	-1.40928	0.0035	Rhbg	Rhesus blood group-associated B glycoprotein
	ENSMUSG00000002265	-0.823907	0.0202	Peg3	paternally expressed 3
	ENSMUSG00000003623	-0.874659	0.00455	Crot	carnitine O-octanoyltransferase
	ENSMUSG00000003721	-1.00826	0.013	Insig2	insulin induced gene 2
	ENSMUSG00000003849	-1.01627	0.0387	Nqo1	NAD(P)H dehydrogenase, quinone 1
	ENSMUSG00000005483	-0.623819	0.0314	Dnajb1	DnaJ heat shock protein family (Hsp40) member B1
	ENSMUSG00000006219	-1.27171	0.00905	Fblim1	filamin binding LIM protein 1
	ENSMUSG00000015312	-1.42272	0.0041	Gadd45b	growth arrest and DNA-damage-inducible 45 beta
	ENSMUSG00000015357	-1.0405	0.00125	Clpx	caseinolytic mitochondrial matrix peptidase chaperone subunit
	ENSMUSG00000015890	-0.840751	0.00395	Amdhd1	amidohydrolase domain containing 1
	ENSMUSG00000015966	-1.37749	0.00025	Il17rb	interleukin 17 receptor B
	ENSMUSG00000016528	-0.822713	0.0074	Mapkapk2	MAP kinase-activated protein kinase 2
	ENSMUSG00000016541	-0.781338	0.0086	Atxn10	ataxin 10
	ENSMUSG00000018405	-2.22726	0.00095	Mrm1	mitochondrial rRNA methyltransferase 1
	ENSMUSG00000019082	-1.0805	0.00455	Slc25a22	solute carrier family 25 (mitochondrial carrier, glutamate), member 22
	ENSMUSG00000019232	-1.34223	0.00015	Etnppl	ethanolamine phosphate phospholyase
	ENSMUSG00000019737	-1.70387	0.0154	Syne4	spectrin repeat containing, nuclear envelope family member 4
	ENSMUSG00000019987	-0.683503	0.03905	Arg1	arginase, liver
	ENSMUSG00000019997	-1.04525	0.02125	Ctgf	connective tissue growth factor
	ENSMUSG00000020014	-1.93628	0.00025	Gm872
	ENSMUSG00000020017	-1.11522	0.0013	Hal	histidine ammonia lyase
	ENSMUSG00000020186	-0.97252	0.0025	Csrp2	cysteine and glycine-rich protein 2
	ENSMUSG00000020423	-0.994235	0.01155	Btg2	B cell translocation gene 2, anti-proliferative
	ENSMUSG00000020429	-1.7901	5e-05	Igfbp1	insulin-like growth factor binding protein 1
	ENSMUSG00000020766	-0.704614	0.0258	Galk1	galactokinase 1
	ENSMUSG00000020775	-1.13362	0.0004	Mrpl38	mitochondrial ribosomal protein L38
	ENSMUSG00000020776	-1.38037	0.0014	Fbf1	Fas (TNFRSF6) binding factor 1
	ENSMUSG00000020865	-0.852536	0.00635	Abcc3	ATP-binding cassette, sub-family C (CFTR/MRP), member 3
	ENSMUSG00000021250	-1.98103	0.0041	Fos	FBJ osteosarcoma oncogene
	ENSMUSG00000021364	-0.595118	0.0483	Elovl2	elongation of very long chain fatty acids (FEN1/Elo2, SUR4/Elo3, yeast)-like 2
	ENSMUSG00000021477	-0.846176	0.00375	Ctsl	cathepsin L
	ENSMUSG00000021871	-1.11671	0.0025	Pnp	purine-nucleoside phosphorylase
	ENSMUSG00000021947	-1.08299	0.01335	Cryl1	crystallin, lambda 1
	ENSMUSG00000021973	-0.856176	0.0139	Micu2	mitochondrial calcium uptake 2
	ENSMUSG00000022346	-1.0731	0.00795	Myc	myelocytomatosis oncogene
	ENSMUSG00000022351	-1.59992	0.0001	Sqle	squalene epoxidase
	ENSMUSG00000022512	-0.591872	0.0316	Cldn1	claudin 1
	ENSMUSG00000022770	-0.68376	0.04975	Dlg1	discs, large homolog 1 (Drosophila)
	ENSMUSG00000022821	-0.793612	0.01015	Hgd	homogentisate 1, 2-dioxygenase
	ENSMUSG00000022853	-1.9568	5e-05	Ehhadh	enoyl-Coenzyme A, hydratase/3-hydroxyacyl Coenzyme A dehydrogenase
	ENSMUSG00000022912	-0.747276	0.0222	Pros1	protein S (alpha)
	ENSMUSG00000023043	-0.755462	0.00415	Krt18	keratin 18
	ENSMUSG00000023044	-0.669502	0.0215	Csad	cysteine sulfinic acid decarboxylase
	ENSMUSG00000023079	-0.904274	0.0017	Gtf2ird1	general transcription factor II I repeat domain-containing 1
	ENSMUSG00000023828	-1.21608	0.0018	Slc22a3	solute carrier family 22 (organic cation transporter), member 3
	ENSMUSG00000024360	-2.11886	5e-05	Etf1	eukaryotic translation termination factor 1
	ENSMUSG00000024747	-0.837637	0.00265	Aldh1a7	aldehyde dehydrogenase family 1, subfamily A7
	ENSMUSG00000024827	-0.912459	0.00155	Gldc	glycine decarboxylase
	ENSMUSG00000024905	-1.48737	0.0016	Mtl5	metallothionein-like 5, testis-specific (tesmin)
	ENSMUSG00000024986	-1.01083	0.0111	Hhex	hematopoietically expressed homeobox
	ENSMUSG00000025190	-1.66752	5e-05	Got1	glutamic-oxaloacetic transaminase 1, soluble
	ENSMUSG00000025260	-0.621258	0.0312	Hsd17b10	hydroxysteroid (17-beta) dehydrogenase 10
	ENSMUSG00000025357	-0.740938	0.02155	Dgka	diacylglycerol kinase, alpha
	ENSMUSG00000025495	-0.886657	0.04625	Ptdss2	phosphatidylserine synthase 2
	ENSMUSG00000025504	-0.659954	0.0246	Eps8l2	EPS8-like 2
	ENSMUSG00000025509	-0.807985	0.01585	Pnpla2	patatin-like phospholipase domain containing 2
	ENSMUSG00000025533	-0.937895	0.01765	Asl	argininosuccinate lyase
	ENSMUSG00000026272	-0.788645	0.0038	Agxt	alanine-glyoxylate aminotransferase
	ENSMUSG00000026390	-1.83695	5e-05	Marco	macrophage receptor with collagenous structure
	ENSMUSG00000026639	-1.59642	0.00095	Lamb3	laminin, beta 3
	ENSMUSG00000026675	-0.948375	0.0398	Hsd17b7	hydroxysteroid (17-beta) dehydrogenase 7
	ENSMUSG00000026822	-1.52732	0.00355	Lcn2	lipocalin 2
	ENSMUSG00000026866	-0.906547	0.00165	Kynu	kynureninase (L-kynurenine hydrolase)
	ENSMUSG00000026981	-4.1849	0.044	Il1rn	interleukin 1 receptor antagonist
	ENSMUSG00000027398	-2.62861	0.0031	Il1b	interleukin 1 beta
	ENSMUSG00000027502	-0.652424	0.0394	Rtfdc1	replication termination factor 2 domain containing 1
	ENSMUSG00000028007	-0.908815	0.0463	Snx7	sorting nexin 7
	ENSMUSG00000028179	-1.87139	5e-05	Cth	cystathionase (cystathionine gamma-lyase)
	ENSMUSG00000028494	-1.00212	0.0025	Plin2	perilipin 2
	ENSMUSG00000028525	-0.763749	0.0282	Pde4b	phosphodiesterase 4B, cAMP specific
	ENSMUSG00000028671	-0.923399	0.04555	Gale	galactose-4-epimerase, UDP
	ENSMUSG00000028712	-1.51004	0.00125	Cyp4a31	cytochrome P450, family 4, subfamily a, polypeptide 31
	ENSMUSG00000028715	-1.69133	0.00055	Cyp4a14	cytochrome P450, family 4, subfamily a, polypeptide 14
	ENSMUSG00000029122	-1.72094	0.02315	Evc	Ellis van Creveld gene syndrome
	ENSMUSG00000029304	-1.47974	0.00585	Spp1	secreted phosphoprotein 1
	ENSMUSG00000029314	-1.16348	0.04	Agpat9	1-acylglycerol-3-phosphate O-acyltransferase 9
	ENSMUSG00000029630	-0.901721	0.032	Cyp3a25	cytochrome P450, family 3, subfamily a, polypeptide 25
	ENSMUSG00000029695	-0.955114	0.0021	Aass	aminoadipate-semialdehyde synthase
	ENSMUSG00000030228	-1.13352	0.00055	Pik3c2g	phosphatidylinositol 3-kinase, C2 domain containing, gamma polypeptide
	ENSMUSG00000030237	-1.10667	0.00335	Slco1a4	solute carrier organic anion transporter family, member 1a4
	ENSMUSG00000030278	-1.52598	0.00895	Cidec	cell death-inducing DFFA-like effector c
	ENSMUSG00000030934	-1.22895	0.02005	Oat	ornithine aminotransferase
	ENSMUSG00000030990	-0.902885	0.01455	Pgap2	post-GPI attachment to proteins 2
	ENSMUSG00000031024	-0.658743	0.0259	St5	suppression of tumorigenicity 5
	ENSMUSG00000031482	-0.920389	0.00195	Slc25a15	solute carrier family 25 (mitochondrial carrier ornithine transporter), member 15
	ENSMUSG00000031604	-0.81677	0.0105	Sc4mol
	ENSMUSG00000031762	-1.05811	0.01595	Mt2	metallothionein 2
	ENSMUSG00000031765	-0.887709	0.01685	Mt1	metallothionein 1
	ENSMUSG00000031808	-1.42286	5e-05	Slc27a1	solute carrier family 27 (fatty acid transporter), member 1
	ENSMUSG00000032080	-1.5497	0.00025	Apoa4	apolipoprotein A-IV
	ENSMUSG00000032271	-1.26814	5e-05	Nnmt	nicotinamide N-methyltransferase
	ENSMUSG00000032349	-1.38882	0.00185	Elovl5	ELOVL family member 5, elongation of long chain fatty acids (yeast)
	ENSMUSG00000032418	-0.794781	0.00685	Me1	malic enzyme 1, NADP(+)-dependent, cytosolic
	ENSMUSG00000032724	-0.860229	0.01135	Abtb2	ankyrin repeat and BTB (POZ) domain containing 2
	ENSMUSG00000032902	-0.910247	0.00085	Slc16a1	solute carrier family 16 (monocarboxylic acid transporters), member 1
	ENSMUSG00000033107	-0.948221	0.0014	Rnf125	ring finger protein 125
	ENSMUSG00000034007	-0.703727	0.01705	Scaper	S phase cyclin A-associated protein in the ER
	ENSMUSG00000034258	-0.755781	0.0277	Mfsd7c	major facilitator superfamily domain containing 7C
	ENSMUSG00000034634	-2.32244	0.0244	Ly6d	lymphocyte antigen 6 complex, locus D
	ENSMUSG00000034709	-0.669173	0.0321	Ppp1r21	protein phosphatase 1, regulatory subunit 21
	ENSMUSG00000035561	-1.25189	0.0001	Aldh1b1	aldehyde dehydrogenase 1 family, member B1
	ENSMUSG00000036957	-1.04616	0.01165	Lrfn3	leucine rich repeat and fibronectin type III domain containing 3
	ENSMUSG00000037379	-1.36564	0.0005	Spon2	spondin 2, extracellular matrix protein
	ENSMUSG00000037798	-1.01715	0.0173	Mat1a	methionine adenosyltransferase I, alpha
	ENSMUSG00000038418	-3.7875	5e-05	Egr1	early growth response 1
	ENSMUSG00000038515	-0.674301	0.02095	Grtp1	GH regulated TBC protein 1
	ENSMUSG00000038754	-1.42276	5e-05	Elovl3	elongation of very long chain fatty acids (FEN1/Elo2, SUR4/Elo3, yeast)-like 3
	ENSMUSG00000039145	-1.96697	0.01215	Camk1d	calcium/calmodulin-dependent protein kinase ID
	ENSMUSG00000039202	-1.12768	0.0005	Abhd2	abhydrolase domain containing 2
	ENSMUSG00000039323	-0.970135	0.00375	Igfbp2	insulin-like growth factor binding protein 2
	ENSMUSG00000040026	-3.46968	5e-05	Saa3	serum amyloid A 3
	ENSMUSG00000040274	-0.773944	0.04075	Cdk6	cyclin-dependent kinase 6
	ENSMUSG00000040562	-0.969682	0.0183	Gstm2	glutathione S-transferase, mu 2
	ENSMUSG00000040722	-0.825987	0.02165	Scamp5	secretory carrier membrane protein 5
	ENSMUSG00000040785	-0.650405	0.03565	Ttc3	tetratricopeptide repeat domain 3
	ENSMUSG00000041119	-0.797542	0.0343	Pde9a	phosphodiesterase 9A
	ENSMUSG00000041959	-0.892937	0.00255	S100a10	S100 calcium binding protein A10 (calpactin)
	ENSMUSG00000042010	-0.643205	0.0325	Acacb	acetyl-Coenzyme A carboxylase beta
	ENSMUSG00000042102	-0.659937	0.0189	Dmgdh	dimethylglycine dehydrogenase precursor
	ENSMUSG00000042104	-1.63678	0.001	Uggt2	UDP-glucose glycoprotein glucosyltransferase 2
	ENSMUSG00000042476	-0.653392	0.02	Abcb4	ATP-binding cassette, sub-family B (MDR/TAP), member 4
	ENSMUSG00000042700	-0.631722	0.02055	Sipa1l1	signal-induced proliferation-associated 1 like 1
	ENSMUSG00000044349	-2.22586	0.0019	Snhg11	small nucleolar RNA host gene 11
	ENSMUSG00000044734	-2.27876	0.0001	Serpinb1a	serine (or cysteine) peptidase inhibitor, clade B, member 1a
	ENSMUSG00000050445	-1.6021	5e-05	Cyp8b1	cytochrome P450, family 8, subfamily b, polypeptide 1
	ENSMUSG00000051506	-1.17164	0.04075	Wdfy4	WD repeat and FYVE domain containing 4
	ENSMUSG00000052407	-0.888519	0.0152	Ccdc171	coiled-coil domain containing 171
	ENSMUSG00000052684	-1.08941	0.00225	Jun	jun proto-oncogene
	ENSMUSG00000053219	-2.55011	0.02355	Raet1e	retinoic acid early transcript 1E
	ENSMUSG00000053453	-0.79055	0.0381	Thoc7	THO complex 7
	ENSMUSG00000055116	-2.44962	0.0034	Arntl	aryl hydrocarbon receptor nuclear translocator-like
	ENSMUSG00000055312	-1.1342	0.01455	0610012H03Rik
	ENSMUSG00000055817	-0.834612	0.0148	Mta3	metastasis associated 3
	ENSMUSG00000056035	-2.36266	5e-05	Cyp3a11	cytochrome P450, family 3, subfamily a, polypeptide 11
	ENSMUSG00000056666	-0.804247	0.0181	Retsat	retinol saturase (all trans retinol 13,14 reductase)
	ENSMUSG00000057054	-0.891287	0.0024	Inca1	inhibitor of CDK, cyclin A1 interacting protein 1
	ENSMUSG00000057425	-1.41025	0.0017	Ugt2b37	UDP glucuronosyltransferase 2 family, polypeptide B37
	ENSMUSG00000057933	-2.37992	0.0001	Gsta2	glutathione S-transferase, alpha 2 (Yc2)
	ENSMUSG00000058672	-1.26592	5e-05	Tubb2a	tubulin, beta 2A class IIA
	ENSMUSG00000060519	-1.47707	0.00405	Tor3a	torsin family 3, member A
	ENSMUSG00000060961	-1.62854	0.0001	Slc4a4	solute carrier family 4 (anion exchanger), member 4
	ENSMUSG00000061292	-1.26596	0.0001	Cyp3a59	cytochrome P450, family 3, subfamily a, polypeptide 59
	ENSMUSG00000061313	-0.585674	0.04655	Ddhd2	DDHD domain containing 2
	ENSMUSG00000063354	-0.84623	0.01875	Slc39a4	solute carrier family 39 (zinc transporter), member 4
	ENSMUSG00000063929	-0.698236	0.0182	Cyp4a32	cytochrome P450, family 4, subfamily a, polypeptide 32
	ENSMUSG00000066071	-0.921204	0.00665	Cyp4a12a	cytochrome P450, family 4, subfamily a, polypeptide 12a
	ENSMUSG00000066072	-1.20314	0.00095	Cyp4a10	cytochrome P450, family 4, subfamily a, polypeptide 10
	ENSMUSG00000067736	-2.89449	5e-05	Gm10222	predicted gene 10222
	ENSMUSG00000068551	-0.942657	0.0325	Zfp467	zinc finger protein 467
	ENSMUSG00000068749	-0.670148	0.0447	Psma5	proteasome (prosome, macropain) subunit, alpha type 5
	ENSMUSG00000069324	-1.43686	5e-05	Gm5096	betaine-homocysteine methyltransferase pseudogene
	ENSMUSG00000069456	-0.816889	0.0055	Rdh16	retinol dehydrogenase 16
	ENSMUSG00000069805	-0.626634	0.04075	Fbp1	fructose bisphosphatase 1
	ENSMUSG00000071302	-3.42638	0.0266	2610044O15Rik8	RIKEN cDNA 2610044O15 gene
	ENSMUSG00000071633	-0.812378	0.01505	Gm4952	predicted gene 4952
	ENSMUSG00000074240	-3.06057	0.0081	Cib3	calcium and integrin binding family member 3
	ENSMUSG00000074768	-1.67827	0.00055	Bhmt	betaine-homocysteine methyltransferase
	ENSMUSG00000076441	-0.716422	0.04895	Ass1	argininosuccinate synthetase 1
	ENSMUSG00000078126	-1.01081	0.03255	Rpl23a-ps3	ribosomal protein L23A, pseudogene 3
	ENSMUSG00000078597	-1.15008	0.0012	Cyp4a12b	cytochrome P450, family 4, subfamily a, polypeptide 12B
	ENSMUSG00000078612	-1.28864	0.00015	1700024P16Rik	RIKEN cDNA 1700024P16 gene
	ENSMUSG00000078673	-1.79186	5e-05	Mup19	major urinary protein 19
	ENSMUSG00000078675	-1.33114	0.0032	Mup16	major urinary protein 16
	ENSMUSG00000089873	-1.05424	0.0194	Mup13	major urinary protein 13
	ENSMUSG00000096062	-1.58975	5e-05	Pik3c2g	phosphatidylinositol 3-kinase, C2 domain containing, gamma polypeptide
	ENSMUSG00000096674	-0.848915	0.04635	Mup15	major urinary protein 15
	ENSMUSG00000096688	-1.33827	0.00615	Mup17	major urinary protein 17
the result of log2 (Ratio) is positive represent up-regulated and the result of log2 (Ratio) is negative represent up-regulated
