# Supplementary material for: Integrative transcriptomics and metabolomics explore the mechanism of kaempferol on improving nonalcoholic steatohepatitis
Source: Royal Society of Chemistry journal article supplement (doi:10.1039/d0fo02123g), 2020-01-01
Supplement: d0fo02123g3.xlsx [file d0fo02123g3.xlsx]

## Sheet:  between C and M
	GO.ID	Term	Ontology	Count	Pvalue
C VS M	Up-regulated
	GO:0070887	cellular response to chemical stimulus	Biological process	51	1.1519e-12
	GO:0034976	response to endoplasmic reticulum stress	Biological process	14	8.30654e-11
	GO:0010033	response to organic substance	Biological process	48	2.01691e-10
	GO:0071310	cellular response to organic substance	Biological process	41	8.24846e-10
	GO:0009987	cellular process	Biological process	130	1.32225e-09
	GO:0042221	response to chemical	Biological process	57	1.67311e-09
	GO:0006950	response to stress	Biological process	50	5.95543e-09
	GO:0008152	metabolic process	Biological process	101	6.35746e-09
	GO:0044237	cellular metabolic process	Biological process	94	8.84849e-09
	GO:0006629	lipid metabolic process	Biological process	26	3.08725e-08
	GO:0005783	endoplasmic reticulum	Cellular component	39	1.98401e-13
	GO:0005790	smooth endoplasmic reticulum	Cellular component	8	3.14422e-11
	GO:0043231	intracellular membrane-bounded organelle	Cellular component	104	3.19869e-11
	GO:0034663	endoplasmic reticulum chaperone complex	Cellular component	6	4.9416e-11
	GO:0005622	intracellular	Cellular component	123	7.44499e-11
	GO:0044424	intracellular part	Cellular component	122	1.3054e-10
	GO:0043227	membrane-bounded organelle	Cellular component	107	1.53051e-10
	GO:0012505	endomembrane system	Cellular component	54	6.86611e-10
	GO:0043229	intracellular organelle	Cellular component	110	2.49132e-09
	GO:0005737	cytoplasm	Cellular component	103	3.59899e-09
	GO:0003756	protein disulfide isomerase activity	Molecular function	5	1.06633e-07
	GO:0016864	intramolecular oxidoreductase activity, transposing S-S bonds	Molecular function	5	1.06633e-07
	GO:0004497	monooxygenase activity	Molecular function	9	4.19925e-07
	GO:0008395	steroid hydroxylase activity	Molecular function	7	4.26126e-07
	GO:0008392	arachidonic acid epoxygenase activity	Molecular function	5	2.74213e-06
	GO:0008391	arachidonic acid monooxygenase activity	Molecular function	5	4.1751e-06
	GO:0020037	heme binding	Molecular function	8	4.31056e-06
	GO:0016705	oxidoreductase activity, acting on paired donors, with incorporation or reduction of molecular oxygen	Molecular function	9	6.1923e-06
	GO:0046906	tetrapyrrole binding	Molecular function	8	6.72838e-06
	GO:0005488	binding	Molecular function	109	8.30774e-06
	Down-regulated
	GO:0044281	small molecule metabolic process	Biological process	172	6.51301e-45
	GO:0008152	metabolic process	Biological process	501	7.86326e-45
	GO:0044237	cellular metabolic process	Biological process	467	9.64304e-44
	GO:0044248	cellular catabolic process	Biological process	167	1.22162e-38
	GO:0055114	oxidation-reduction process	Biological process	112	1.04311e-37
	GO:0006082	organic acid metabolic process	Biological process	113	1.12647e-37
	GO:0009056	catabolic process	Biological process	177	2.25788e-37
	GO:0019752	carboxylic acid metabolic process	Biological process	108	5.02753e-37
	GO:0043436	oxoacid metabolic process	Biological process	110	1.49714e-36
	GO:0071704	organic substance metabolic process	Biological process	468	2.40081e-36
	GO:0005737	cytoplasm	Cellular component	568	1.06704e-79
	GO:0044444	cytoplasmic part	Cellular component	489	9.57799e-79
	GO:0005622	intracellular	Cellular component	619	2.61731e-64
	GO:0044424	intracellular part	Cellular component	615	2.94395e-63
	GO:0043229	intracellular organelle	Cellular component	552	3.09763e-51
	GO:0043226	organelle	Cellular component	556	1.46548e-49
	GO:0043231	intracellular membrane-bounded organelle	Cellular component	496	8.53591e-47
	GO:0043227	membrane-bounded organelle	Cellular component	515	9.46718e-46
	GO:0044464	cell part	Cellular component	638	1.03001e-42
	GO:0005623	cell	Cellular component	638	1.20052e-42
	GO:0003824	catalytic activity	Molecular function	336	1.35088e-39
	GO:0005488	binding	Molecular function	541	5.71309e-31
	GO:0016491	oxidoreductase activity	Molecular function	89	1.85757e-27
	GO:0048037	cofactor binding	Molecular function	68	1.42896e-24
	GO:0036094	small molecule binding	Molecular function	152	1.02995e-19
	GO:0043167	ion binding	Molecular function	268	1.46958e-19
	GO:0050662	coenzyme binding	Molecular function	42	1.20404e-17
	GO:1901363	heterocyclic compound binding	Molecular function	244	1.00787e-15
	GO:0097159	organic cyclic compound binding	Molecular function	247	1.61414e-15
	GO:0005515	protein binding	Molecular function	370	3.50851e-15

## Sheet: between M and K
M VS K	GO.ID	Term	Ontology	Count	Pvalue
	Up-regulated
	GO:0008152	metabolic process	Biological process	400	1.60678e-26
	GO:0044237	cellular metabolic process	Biological process	368	8.55537e-25
	GO:0071704	organic substance metabolic process	Biological process	379	2.57433e-23
	GO:0044238	primary metabolic process	Biological process	365	8.1378e-23
	GO:1901564	organonitrogen compound metabolic process	Biological process	254	3.38468e-18
	GO:0009987	cellular process	Biological process	497	4.06995e-18
	GO:0006807	nitrogen compound metabolic process	Biological process	333	5.79459e-17
	GO:0044281	small molecule metabolic process	Biological process	105	3.93564e-16
	GO:0043170	macromolecule metabolic process	Biological process	310	5.23677e-14
	GO:0019538	protein metabolic process	Biological process	214	1.08377e-13
	GO:0005622	intracellular	Cellular component	506	4.64787e-45
	GO:0044424	intracellular part	Cellular component	502	5.85272e-44
	GO:0005737	cytoplasm	Cellular component	437	7.09609e-43
	GO:0043229	intracellular organelle	Cellular component	447	1.08136e-34
	GO:0044444	cytoplasmic part	Cellular component	352	1.64454e-34
	GO:0043226	organelle	Cellular component	452	3.6198e-34
	GO:0044464	cell part	Cellular component	532	1.08117e-33
	GO:0005623	cell	Cellular component	532	1.22438e-33
	GO:0043227	membrane-bounded organelle	Cellular component	416	6.64408e-31
	GO:0043231	intracellular membrane-bounded organelle	Cellular component	398	6.65069e-31
	GO:0005488	binding	Molecular function	440	1.88729e-21
	GO:0003824	catalytic activity	Molecular function	230	2.39563e-14
	GO:0043167	ion binding	Molecular function	216	3.68776e-14
	GO:0005515	protein binding	Molecular function	308	1.05725e-12
	GO:1901363	heterocyclic compound binding	Molecular function	199	5.03839e-12
	GO:0097159	organic cyclic compound binding	Molecular function	202	5.24877e-12
	GO:0019899	enzyme binding	Molecular function	108	2.98949e-10
	GO:0043169	cation binding	Molecular function	144	1.53438e-09
	GO:0046872	metal ion binding	Molecular function	139	4.96246e-09
	GO:0140096	catalytic activity, acting on a protein	Molecular function	100	1.45303e-08
	Down-regulated
	GO:0035634	response to stilbenoid	Biological process	3	4.00485e-06
	GO:0001676	long-chain fatty acid metabolic process	Biological process	4	8.80923e-06
	GO:0019373	epoxygenase P450 pathway	Biological process	3	1.27736e-05
	GO:0017144	drug metabolic process	Biological process	7	4.05318e-05
	GO:0043618	regulation of transcription from RNA polymerase II promoter in response to stress	Biological process	3	4.95986e-05
	GO:0008152	metabolic process	Biological process	27	5.70955e-05
	GO:0042738	exogenous drug catabolic process	Biological process	3	5.91074e-05
	GO:0043620	regulation of DNA-templated transcription in response to stress	Biological process	3	6.60661e-05
	GO:0035821	modification of morphology or physiology of other organism	Biological process	4	7.37301e-05
	GO:0019369	arachidonic acid metabolic process	Biological process	3	8.15472e-05
	GO:0043227	membrane-bounded organelle	Cellular component	28	1.83089e-05
	GO:0044424	intracellular part	Cellular component	31	2.11196e-05
	GO:0005622	intracellular	Cellular component	31	2.61256e-05
	GO:0005737	cytoplasm	Cellular component	27	6.27877e-05
	GO:0043231	intracellular membrane-bounded organelle	Cellular component	26	9.12287e-05
	GO:0043229	intracellular organelle	Cellular component	28	0.000122035
	GO:0043226	organelle	Cellular component	28	0.000199151
	GO:0005719	nuclear euchromatin	Cellular component	2	0.000744896
	GO:0000791	euchromatin	Cellular component	2	0.0013729
	GO:0044464	cell part	Cellular component	31	0.0016369
	GO:0016712	oxidoreductase activity, acting on paired donors, with incorporation or reduction of molecular oxygen, reduced flavin or flavoprotein as one donor, and incorporation of one atom of oxygen	Molecular function	4	1.93986e-06
	GO:0008395	steroid hydroxylase activity	Molecular function	4	3.99571e-06
	GO:0008392	arachidonic acid epoxygenase activity	Molecular function	3	1.85837e-05
	GO:0008391	arachidonic acid monooxygenase activity	Molecular function	3	2.38806e-05
	GO:0020037	heme binding	Molecular function	4	6.01703e-05
	GO:0004497	monooxygenase activity	Molecular function	4	6.18009e-05
	GO:1901363	heterocyclic compound binding	Molecular function	18	7.22095e-05
	GO:0046906	tetrapyrrole binding	Molecular function	4	7.60313e-05
	GO:0005488	binding	Molecular function	30	7.83762e-05
	GO:0097159	organic cyclic compound binding	Molecular function	18	9.58003e-05

## Sheet: between K and C
	GO.ID	Term	Ontology	Count	Pvalue
K VS C	Up-regulated
	GO:0009987	cellular process	Biological process	321	1.3093e-10
	GO:0008152	metabolic process	Biological process	267	9.21783e-20
	GO:0071704	organic substance metabolic process	Biological process	257	5.18834e-19
	GO:0065007	biological regulation	Biological process	253	1.70018e-07
	GO:0044237	cellular metabolic process	Biological process	251	1.45964e-20
	GO:0044238	primary metabolic process	Biological process	247	2.63596e-18
	GO:0050789	regulation of biological process	Biological process	240	1.06332e-06
	GO:0050794	regulation of cellular process	Biological process	233	1.75804e-07
	GO:0006807	nitrogen compound metabolic process	Biological process	227	2.12308e-14
	GO:0043170	macromolecule metabolic process	Biological process	214	7.2447e-13
	GO:0044464	cell part	Cellular component	331	4.55123e-14
	GO:0005623	cell	Cellular component	331	4.8542e-14
	GO:0005622	intracellular	Cellular component	309	1.67976e-18
	GO:0044424	intracellular part	Cellular component	306	7.2291e-18
	GO:0043226	organelle	Cellular component	277	5.09916e-15
	GO:0043229	intracellular organelle	Cellular component	273	4.53815e-15
	GO:0043227	membrane-bounded organelle	Cellular component	263	5.57034e-17
	GO:0043231	intracellular membrane-bounded organelle	Cellular component	249	3.44481e-16
	GO:0005737	cytoplasm	Cellular component	236	3.64234e-09
	GO:0044444	cytoplasmic part	Cellular component	183	3.71262e-07
	GO:0005488	binding	Molecular function	280	1.05967e-10
	GO:0005515	protein binding	Molecular function	194	1.75916e-06
	GO:0097159	organic cyclic compound binding	Molecular function	139	6.52361e-10
	GO:1901363	heterocyclic compound binding	Molecular function	137	6.28216e-10
	GO:0043167	ion binding	Molecular function	130	2.29024e-06
	GO:0003824	catalytic activity	Molecular function	127	0.000492909
	GO:0043169	cation binding	Molecular function	91	1.19729e-05
	GO:0046872	metal ion binding	Molecular function	90	6.61379e-06
	GO:0003676	nucleic acid binding	Molecular function	88	7.84334e-07
	GO:0140110	transcription regulator activity	Molecular function	72	2.08134e-14
	Down-regulated
	GO:0009987	cellular process	Biological process	123	0.000834691
	GO:0008152	metabolic process	Biological process	104	4.8029e-08
	GO:0071704	organic substance metabolic process	Biological process	92	4.65074e-05
	GO:0044237	cellular metabolic process	Biological process	91	5.91749e-06
	GO:0044238	primary metabolic process	Biological process	89	3.81437e-05
	GO:0050896	response to stimulus	Biological process	80	0.00123448
	GO:0006807	nitrogen compound metabolic process	Biological process	78	0.0027365
	GO:1901564	organonitrogen compound metabolic process	Biological process	65	1.67505e-05
	GO:0051716	cellular response to stimulus	Biological process	62	0.0303579
	GO:1901576	organic substance biosynthetic process	Biological process	57	0.000122382
	GO:0044464	cell part	Cellular component	142	9.99385e-11
	GO:0005623	cell	Cellular component	142	1.03392e-10
	GO:0005622	intracellular	Cellular component	134	4.77236e-13
	GO:0044424	intracellular part	Cellular component	132	3.2851e-12
	GO:0005737	cytoplasm	Cellular component	128	6.46011e-20
	GO:0043226	organelle	Cellular component	113	2.5671e-07
	GO:0043229	intracellular organelle	Cellular component	110	7.94992e-07
	GO:0043227	membrane-bounded organelle	Cellular component	109	8.34066e-09
	GO:0044444	cytoplasmic part	Cellular component	102	1.47892e-14
	GO:0043231	intracellular membrane-bounded organelle	Cellular component	100	3.56354e-07
	GO:0005488	binding	Molecular function	120	9.97471e-08
	GO:0005515	protein binding	Molecular function	88	4.03717e-06
	GO:0003824	catalytic activity	Molecular function	80	2.7107e-12
	GO:0043167	ion binding	Molecular function	66	1.04914e-07
	GO:0097159	organic cyclic compound binding	Molecular function	54	0.00030003
	GO:1901363	heterocyclic compound binding	Molecular function	52	0.000635245
	GO:0043169	cation binding	Molecular function	38	0.00196885
	GO:0036094	small molecule binding	Molecular function	37	8.39178e-07
	GO:0046872	metal ion binding	Molecular function	37	0.00219546
	GO:0043168	anion binding	Molecular function	36	2.97181e-05
