# Supplementary material for: Integrative transcriptomics and metabolomics explore the mechanism of kaempferol on improving nonalcoholic steatohepatitis
Source: Royal Society of Chemistry journal article supplement (doi:10.1039/d0fo02123g), 2020-01-01
Supplement: d0fo02123g4.xlsx [file d0fo02123g4.xlsx]

## Sheet: between C and M
	PathwayID	Definition	Fisher-Pvalue	SelectionCounts
C VS M	Up-regulated
	mmu04141	Protein processing in endoplasmic reticulum	7.10602e-08	12
	mmu00140	Steroid hormone biosynthesis	0.0015171	5
	mmu00830	Retinol metabolism	0.00167876	5
	mmu04950	Maturity onset diabetes of the young	0.00218983	3
	mmu04931	Insulin resistance	0.00439363	5
	mmu04750	Inflammatory mediator regulation of TRP channels	0.00748215	5
	mmu05202	Transcriptional misregulation in cancer	0.00753349	6
	mmu04152	AMPK signaling pathway	0.00824509	5
	mmu04068	FoxO signaling pathway	0.00963431	5
	mmu00120	Primary bile acid biosynthesis	0.0102671	2
	mmu04910	Insulin signaling pathway	0.0118394	5
	mmu04930	Type II diabetes mellitus	0.0125082	3
	mmu05204	Chemical carcinogenesis	0.0125905	4
	mmu04915	Estrogen signaling pathway	0.0150225	4
	mmu00561	Glycerolipid metabolism	0.0194979	3
	mmu04213	Longevity regulating pathway - multiple species	0.0241444	3
	mmu04918	Thyroid hormone synthesis	0.0315691	3
	mmu04976	Bile secretion	0.0315691	3
	mmu04071	Sphingolipid signaling pathway	0.032339	4
	mmu04917	Prolactin signaling pathway	0.0350776	3
	mmu04710	Circadian rhythm	0.0362285	2
	mmu05100	Bacterial invasion of epithelial cells	0.0400567	3
	mmu05020	Prion diseases	0.0429023	2
	mmu04550	Signaling pathways regulating pluripotency of stem cells	0.0471145	4
M VS K	Down-regulated
	mmu01200	Carbon metabolism	4.82367e-14	30
	mmu04146	Peroxisome	6.23028e-11	22
	mmu00071	Fatty acid degradation	8.90826e-11	17
	mmu03050	Proteasome	2.22135e-09	15
	mmu03010	Ribosome	5.52284e-08	25
	mmu03320	PPAR signaling pathway	8.69961e-08	18
	mmu00640	Propanoate metabolism	1.55056e-07	11
	mmu00280	Valine, leucine and isoleucine degradation	4.43044e-07	14
	mmu00020	Citrate cycle (TCA cycle)	2.21045e-06	10
	mmu00830	Retinol metabolism	3.20698e-05	15
	mmu01230	Biosynthesis of amino acids	3.28835e-05	14
	mmu01212	Fatty acid metabolism	3.50381e-05	11
	mmu00190	Oxidative phosphorylation	6.22441e-05	19
	mmu00630	Glyoxylate and dicarboxylate metabolism	8.422e-05	8
	mmu00010	Glycolysis / Gluconeogenesis	9.26024e-05	12
	mmu00260	Glycine, serine and threonine metabolism	0.000157125	9
	mmu00650	Butanoate metabolism	0.00028609	7
	mmu00620	Pyruvate metabolism	0.000594548	8
	mmu05012	Parkinson's disease	0.00127135	17
	mmu05010	Alzheimer's disease	0.00140651	19
	mmu00062	Fatty acid elongation	0.00152293	6
	mmu00270	Cysteine and methionine metabolism	0.00245457	8
	mmu00250	Alanine, aspartate and glutamate metabolism	0.00252023	7
	mmu00300	Lysine biosynthesis	0.00252599	2
	mmu00220	Arginine biosynthesis	0.00260203	5
	mmu00310	Lysine degradation	0.0041086	8
	mmu05016	Huntington's disease	0.00529225	19
	mmu00410	beta-Alanine metabolism	0.00544075	6
	mmu00480	Glutathione metabolism	0.00651266	8
	mmu00380	Tryptophan metabolism	0.00852005	7
	mmu04976	Bile secretion	0.00882873	9
	mmu01040	Biosynthesis of unsaturated fatty acids	0.0101434	5
	mmu04922	Glucagon signaling pathway	0.0131923	11
	mmu00590	Arachidonic acid metabolism	0.0145704	10
	mmu00130	Ubiquinone and other terpenoid-quinone biosynthesis	0.0154199	3
	mmu00980	Metabolism of xenobiotics by cytochrome P450	0.0156522	8
	mmu00500	Starch and sucrose metabolism	0.017781	7
	mmu05204	Chemical carcinogenesis	0.0180271	10
	mmu00982	Drug metabolism - cytochrome P450	0.0185501	8
	mmu00564	Glycerophospholipid metabolism	0.0193036	10
	mmu04142	Lysosome	0.0218457	12
	mmu03013	RNA transport	0.0239938	15
	mmu04910	Insulin signaling pathway	0.0249594	13
	mmu04932	Non-alcoholic fatty liver disease (NAFLD)	0.026421	14
	mmu00561	Glycerolipid metabolism	0.0276878	7
	mmu00120	Primary bile acid biosynthesis	0.0434574	3
	mmu05230	Central carbon metabolism in cancer	0.0470137	7
	mmu04066	HIF-1 signaling pathway	0.0471653	10
	mmu00350	Tyrosine metabolism	0.0486764	5

## Sheet: between M and K
	PathwayID	Definition	Fisher-Pvalue	SelectionCounts
C VS M	Up-regulated
	mmu03010	Ribosome	2.57685e-07	20
	mmu04910	Insulin signaling pathway	0.000168568	15
	mmu04922	Glucagon signaling pathway	0.00029724	12
	mmu05020	Prion diseases	0.00122587	6
	mmu00071	Fatty acid degradation	0.00177173	7
	mmu05230	Central carbon metabolism in cancer	0.00249143	8
	mmu04210	Apoptosis	0.00251106	9
	mmu00500	Starch and sucrose metabolism	0.00313164	7
	mmu04014	Ras signaling pathway	0.00406602	17
	mmu04710	Circadian rhythm	0.00472392	5
	mmu04142	Lysosome	0.00520436	11
	mmu04931	Insulin resistance	0.00680724	10
	mmu00010	Glycolysis / Gluconeogenesis	0.00953525	7
	mmu01200	Carbon metabolism	0.00975161	10
	mmu04550	Signaling pathways regulating pluripotency of stem cells	0.0125629	11
	mmu04610	Complement and coagulation cascades	0.0132193	8
	mmu04066	HIF-1 signaling pathway	0.0170949	9
	mmu00630	Glyoxylate and dicarboxylate metabolism	0.0220203	4
	mmu03050	Proteasome	0.0225464	5
	mmu04915	Estrogen signaling pathway	0.0253873	8
	mmu04213	Longevity regulating pathway - multiple species	0.0277484	6
	mmu03320	PPAR signaling pathway	0.0286376	7
	mmu04350	TGF-beta signaling pathway	0.0339639	7
	mmu00220	Arginine biosynthesis	0.0340006	3
	mmu01210	2-Oxocarboxylic acid metabolism	0.0340006	3
	mmu05211	Renal cell carcinoma	0.0359814	6
	mmu01212	Fatty acid metabolism	0.0364333	5
	mmu04012	ErbB signaling pathway	0.0378589	7
	mmu04010	MAPK signaling pathway	0.0413215	15
	mmu00830	Retinol metabolism	0.0420368	7
	mmu04924	Renin secretion	0.0430887	6
	mmu04976	Bile secretion	0.0430887	6
	mmu05012	Parkinson's disease	0.0438847	10
	mmu04360	Axon guidance	0.0442671	9
	mmu04920	Adipocytokine signaling pathway	0.04564	6
	mmu04015	Rap1 signaling pathway	0.0469982	13
M VS K	Down-regulated
	mmu00140	Steroid hormone biosynthesis	0.00113726	3
	mmu00830	Retinol metabolism	0.00121473	3
	mmu05204	Chemical carcinogenesis	0.00137953	3
	mmu00591	Linoleic acid metabolism	0.00640764	2
	mmu05210	Colorectal cancer	0.0103339	2
	mmu05132	Salmonella infection	0.0150852	2
	mmu05169	Epstein-Barr virus infection	0.017039	3
	mmu04012	ErbB signaling pathway	0.0185501	2
	mmu00590	Arachidonic acid metabolism	0.0197735	2
	mmu04010	MAPK signaling pathway	0.0221738	3
	mmu04668	TNF signaling pathway	0.0287585	2
	mmu04919	Thyroid hormone signaling pathway	0.032227	2
	mmu04110	Cell cycle	0.0363845	2
	mmu04750	Inflammatory mediator regulation of TRP channels	0.0369183	2
	mmu04068	FoxO signaling pathway	0.0412982	2
	mmu04310	Wnt signaling pathway	0.0470377	2
	mmu05161	Hepatitis B	0.0482196	2

## Sheet: between K and C
	PathwayID	Definition	Fisher-Pvalue	SelectionCounts
	Up-regulated
K VS C	mmu04141	Protein processing in endoplasmic reticulum	1.38163e-09	170
	mmu04710	Circadian rhythm	3.24236e-05	31
	mmu04931	Insulin resistance	0.000430596	111
	mmu04930	Type II diabetes mellitus	0.00341457	50
	mmu05202	Transcriptional misregulation in cancer	0.00350556	178
	mmu00450	Selenocompound metabolism	0.00464579	17
	mmu04933	AGE-RAGE signaling pathway in diabetic complications	0.00481616	102
	mmu00140	Steroid hormone biosynthesis	0.00867981	87
	mmu05204	Chemical carcinogenesis	0.0118584	93
	mmu04071	Sphingolipid signaling pathway	0.0135365	124
	mmu04152	AMPK signaling pathway	0.0165231	129
	mmu05014	Amyotrophic lateral sclerosis (ALS)	0.0214406	52
	mmu05221	Acute myeloid leukemia	0.0289365	57
	mmu04611	Platelet activation	0.0403027	123
	mmu00120	Primary bile acid biosynthesis	0.0414719	16
	mmu04932	Non-alcoholic fatty liver disease (NAFLD)	0.0421459	157
	mmu05230	Central carbon metabolism in cancer	0.0459156	66
	mmu04960	Aldosterone-regulated sodium reabsorption	0.0479968	40
	Down-regulated
	mmu00830	Retinol metabolism	1.8499e-09	89
	mmu03320	PPAR signaling pathway	1.19605e-07	82
	mmu00071	Fatty acid degradation	2.33123e-07	49
	mmu00220	Arginine biosynthesis	0.000126638	20
	mmu00260	Glycine, serine and threonine metabolism	0.000203602	41
	mmu00330	Arginine and proline metabolism	0.000523068	50
	mmu01230	Biosynthesis of amino acids	0.00064258	79
	mmu00590	Arachidonic acid metabolism	0.00127793	90
	mmu04750	Inflammatory mediator regulation of TRP channels	0.00148035	126
	mmu00250	Alanine, aspartate and glutamate metabolism	0.00160238	38
	mmu00100	Steroid biosynthesis	0.00195643	19
	mmu00270	Cysteine and methionine metabolism	0.00381196	48
	mmu01200	Carbon metabolism	0.00479888	117
	mmu00062	Fatty acid elongation	0.00490349	26
	mmu00340	Histidine metabolism	0.00490349	26
	mmu04270	Vascular smooth muscle contraction	0.00739476	128
	mmu00561	Glycerolipid metabolism	0.00796807	59
	mmu05204	Chemical carcinogenesis	0.00814348	93
	mmu00040	Pentose and glucuronate interconversions	0.0122222	36
	mmu04976	Bile secretion	0.0150559	71
	mmu00620	Pyruvate metabolism	0.0151977	39
	mmu05133	Pertussis	0.0172952	74
	mmu04978	Mineral absorption	0.0235999	46
	mmu00380	Tryptophan metabolism	0.0249683	47
	mmu05323	Rheumatoid arthritis	0.025218	83
	mmu00140	Steroid hormone biosynthesis	0.0293385	87
	mmu01212	Fatty acid metabolism	0.0308615	51
	mmu00310	Lysine degradation	0.0324393	52
	mmu00564	Glycerophospholipid metabolism	0.0374607	94
	mmu00280	Valine, leucine and isoleucine degradation	0.0391641	56
	mmu00360	Phenylalanine metabolism	0.0407759	24
	mmu04620	Toll-like receptor signaling pathway	0.0467554	101
	mmu05231	Choline metabolism in cancer	0.0467554	101
