# Supplementary material for: Integrative transcriptomics and metabolomics explore the mechanism of kaempferol on improving nonalcoholic steatohepatitis
Source: Royal Society of Chemistry journal article supplement (doi:10.1039/d0fo02123g), 2020-01-01
Supplement: d0fo02123g5.xlsx [file d0fo02123g5.xlsx]

## Sheet: Serum
	C VS M				M VS K				K VS C
	Metabolite	log2FC(C/M)	p	Regulation	Metabolite	log2FC(M/K)	p	Regulation	Metabolite	log2FC(C/K)	p	Regulation
Serum	L_Serine	-0.448816	0.000666	Down	Tartaric acid	-0.991402	0.02731	Down	L_Serine	-0.562664	0.000666001	Down
	Methylcysteine	-0.930012	0.000666	Down	Acetaminophen	-0.434132	0.037918	Down	Methylcysteine	-0.486138	0.000666001	Down
	Hippuric acid	2.08689	0.000666	Up	L_Alanine	-0.434072	0.020668	Down	Hippuric acid	2.52746	0.000666001	Up
	3_Hydroxyisovaleric acid	0.320343	0.000666	Up	Phosphoribosyl pyrophosphate	-0.310842	0.028127	Down	N_Acetyl_L_aspartic acid	1.00927	0.000666001	Up
	L_Tryptophan	-0.664204	0.000666	Down	C4 0	-0.221923	0.040421	Down	N_Acetylglutamine	1.10395	0.000666001	Up
	C18 3 cis_6 9 12	0.849513	0.000666	Up	bMCA	-0.217222	0.02697	Down	C22 5 cis_4 7 10 13 16	-0.572442	0.000666001	Down
	C20 4 cis_5 8 11 14	-0.743525	0.000666	Down	N_Acetylserine	0.230998	0.037918	Up	3_Hydroxyisovaleric acid	0.243592	0.001332	Up
	C22 5 cis_4 7 10 13 16	-0.782372	0.000666	Down	trans_Aconitic acid	0.311393	0.014763	Up	C20 5 cis_5 8 11 14 17	0.966534	0.001332	Up
	C22 4 cis_7 10 13 16	-0.941047	0.000666	Down	Indoleacetic acid	0.314964	0.040421	Up	C20 2 cis_11 14	-1.03699	0.001332	Down
	C20 2 cis_11 14	-1.04313	0.000666	Down	cis_Aconitic acid	0.317514	0.006993	Up	Hydrocinnamic acid	0.972369	0.00236165	Up
	C21 1 cis_12	1.07883	0.000666	Up	Glutaconic acid	0.332818	0.014763	Up	Tartaric acid	-2.65955	0.00236165	Down
	L_Asparagine	-0.433007	0.001332	Down	C22 5 cis_7 10 13 16 19	0.341736	0.037918	Up	2_Phenylpropionate	1.05749	0.00238806	Up
	N_Acetyl_L_aspartic acid	0.94308	0.001332	Up	L_Tyrosine	0.346274	0.037918	Up	Phenylpyruvic acid	0.561689	0.002664	Up
	D_2_Hydroxyglutaric acid	-0.744365	0.001332	Down	Citric acid	0.373455	0.010412	Up	D_Gluconolactone	0.578295	0.002664	Up
	Acetylglycine	0.572831	0.001332	Up	L_Tryptophan	0.376539	0.020668	Up	Malonic acid	1.21088	0.002664	Up
	D_Glucose	-1.08646	0.001332	Down	C22 4 cis_7 10 13 16	0.405233	0.014763	Up	C20 4 cis_5 8 11 14	-0.572027	0.002664	Down
	UDCA	0.135461	0.001332	Up	Methylcysteine	0.443874	0.020668	Up	Indoleacetic acid	1.32301	0.00363824	Up
	Hydrocinnamic acid	0.982176	0.002362	Up	3_ 3_Hydroxyphenyl _3_hydroxypropanoic acid	0.517028	0.015638	Up	“up” means that the compound is over-accumulated in C group, compared with K group while “down” means that the compound is less-accumulated.
	Tartaric acid	-1.66815	0.002362	Down	Malonic acid	0.518482	0.010412	Up
	2_Phenylpropionate	1.01843	0.002388	Up	C20 5 cis_5 8 11 14 17	0.544374	0.002953	Up
	C18 1 trans_11	-2.45088	0.002388	Down	D_2_Hydroxyglutaric acid	0.554474	0.002953	Up
	L_Lysine	-0.426588	0.002664	Down	Hydroxyphenyllactic acid	0.735423	0.000311	Up
	L_Acetylcarnitine	0.586892	0.002664	Up	Phenylpyruvic acid	0.819901	0.02731	Up
	p_Cresol sulfate	-1.69689	0.002664	Down	4_Hydroxyphenylpyruvic acid	0.838917	0.000622	Up
	L_Alanine	0.528833	0.004662	Up	p_Cresol sulfate	0.853307	0.006993	Up
	L_threonine	-0.299316	0.004662	Down	TCDCA	1.36305	0.015485	Up
	L_Tyrosine	-0.378633	0.004662	Down	TwMCA	2.0486	0.004662	up
	Glutaconic acid	-0.640701	0.004662	Down	“up” means that the compound is over-accumulated in K group, compared with M group while “down” means that the compound is less-accumulated.
	D_Fructose	-0.418908	0.004662	Down
	C3 0	0.218197	0.004662	Up
	Citramalic acid	-0.651776	0.004662	Down
	TDCA	-0.882554	0.005458	Down
		“up” means that the compound is over-accumulated in M group, compared with C group while “down” means that the compound is less-accumulated.

## Sheet: Liver
	C VS M				M VS K				K VS C
	Metabolite	log2FC(C/M)	p	Regulation	Metabolite	log2FC(M/K)	p	Regulation	Metabolite	log2FC(C/K)	p	Regulation
Liver	L-Serine	0.401596	0.000666	Up	Glutaric acid	0.426633	0.001088	Up	L-Serine	0.41709	0.000666001	Up
	Gamma-Aminobutyric acid	1.05645	0.000666	Up	Methylsuccinic acid	0.343345	0.006993	Up	L-Alanine	0.249471	0.000666001	Up
	L-Kynurenine	1.47693	0.000666	Up	L-Phenylalanine	-0.34536	0.010412	Down	Gamma-Aminobutyric acid	0.962826	0.000666001	Up
	L-Aspartic acid	0.876782	0.000666	Up	C18:3(cis-6,9,12)	-0.5526	0.037918	Down	L-Kynurenine	1.37398	0.000666001	Up
	Hippuric acid	0.900866	0.000666	Up	Gallic acid	-0.31866	0.049883	Down	L-Aspartic acid	0.738907	0.000666001	Up
	Phenylacetic acid	1.82	0.000666	Up	“up” means that the compound is over-accumulated in K group, compared with M group while “down” means that the compound is less-accumulated.				Hippuric acid	1.03706	0.000666001	Up
	Glycine	0.450682	0.000666	Up					Glutaric acid	0.560678	0.000666001	Up
	Citrulline	1.35848	0.000666	Up					Glycine	0.333814	0.000666001	Up
	L-Alpha-aminobutyric acid	1.26827	0.000666	Up					L-Pipecolic acid	1.20257	0.000666001	Up
	N-Acetylserine	0.706566	0.000666	Up					Quinic acid	0.482421	0.000666001	Up
	L-Pipecolic acid	1.1036	0.000666	Up					D-Maltose and Alpha-Lactose	-7.05507	0.000666001	Down
	L-Acetylcarnitine	1.00276	0.000666	Up					L-Valine	0.471078	0.000666001	Up
	Acetylglycine	0.656114	0.000666	up					D-Glucose	-1.47355	0.000666001	Down
	D-Maltose and Alpha-Lactose	-6.46052	0.000666	Down					L-Methionine	0.444171	0.000666001	Up
	L-Valine	0.557829	0.000666	Up					D-Fructose	-1.37362	0.000666001	Down
	D-Glucose	-1.52577	0.000666	Down					D-Ribulose	-1.69359	0.000666001	Down
	L-Methionine	0.578281	0.000666	Up					D-Xylulose	-1.30405	0.000666001	Down
	D-Fructose	-1.09013	0.000666	Down					C4:0	0.926779	0.000666001	Up
	C4:0	0.796981	0.000666	Up					Malonic acid	0.297048	0.000666001	Up
	N-Methylnicotinamide	0.492882	0.000666	Up					Methylsuccinic acid	0.539667	0.000666001	Up
	5-Dodecenoic acid	1.60032	0.000666	Up					5-Dodecenoic acid	1.21791	0.000666001	Up
	C20:5(cis-5,8,11,14,17)	1.11887	0.000666	Up					C20:5(cis-5,8,11,14,17)	0.964294	0.000666001	Up
	C22:4(cis-7,10,13,16)	-1.51288	0.000666	Down					C22:5(cis-4,7,10,13,16)	-1.01575	0.000666001	Down
	Gallic acid	0.626514	0.001332	Up					C22:4(cis-7,10,13,16)	-1.0898	0.000666001	Down
	L-Lactic acid	-0.69718	0.001332	Down					C20:2(cis-11,14)	-0.918126	0.000666001	Down
	L-Asparagine	-0.91986	0.001332	Down					6,7-diketoLCA	0.767418	0.000666001	Up
	3-Hydroxyisovaleric acid	0.793728	0.001332	Up					Beta-Alanine	0.823138	0.001332	Up
	C3:0	0.549978	0.001332	Up					Ribonic acid	0.480648	0.001332	Up
	C22:5(cis-4,7,10,13,16)	-1.05699	0.001332	Down					L-Alpha-aminobutyric acid	0.981177	0.001332	Up
	12-DHCA	4.00883	0.001332	Up					C14:1(cis-9)	0.653989	0.001332	Up
	L-Alanine	0.246575	0.002664	Up					Citrulline	1.67025	0.00238806	Up
	D-Ribulose	-1.40845	0.002664	Down					L-Lactic acid	-0.681101	0.002664	Down
	D-Xylulose	-1.06844	0.002664	Down					N-Acetyl-L-aspartic acid	1.29385	0.002664	Up
	L-Isoleucine and L-Leucine	0.360852	0.002664	Up					Ortho-Hydroxyphenylacetic acid	0.230845	0.002664	Up
	C18:3(cis-9,12,15)	0.666445	0.002664	Up					Phenylpyruvic acid	0.614328	0.002664	Up
	C18:3(cis-6,9,12)	0.839001	0.002664	Up					Mandelic acid	0.469966	0.002664	Up
	C16:1(trans-9)	-1.07589	0.002664	Down					Phenylacetic acid	2.49628	0.00331197	Up
	L-Phenylalanine	0.566376	0.004662	Up					Gallic acid	0.307851	0.00466201	Up
	N-Acetyl-L-aspartic acid	1.59715	0.004662	Up					N-Acetylserine	0.580957	0.00466201	Up
	C14:1(cis-9)	0.682375	0.004662	Up					Lactulose	-1.12102	0.00466201	Down
	6,7-diketoLCA	0.64996	0.004662	Up					3-Hydroxyisovaleric acid	0.721346	0.00466201	Up
	Beta-Alanine	0.601468	0.007992	Up					L-Isoleucine and L-Leucine	0.278186	0.00466201	Up
	L-threonine	0.351725	0.007992	Up					C16:1(trans-9)	-0.687188	0.00466201	Down
	D-Gluconolactone	0.574264	0.007992	Up					C18:2(trans-9,12)	0.493332	0.00466201	Up
	Maltotriose	-3.76383	0.007992	Down					Glyceraldehyde	-3.78701	0.00500593	Down
	C18:2(trans-9,12)	0.628711	0.007992	Up					4-Hydroxyphenylpyruvic acid	1.23982	0.00799201	Up
	wMCA	0.901878	0.007992	Up					Acetylglycine	0.518584	0.00799201	Up
	“up” means that the compound is over-accumulated in M group, compared with C group while “down” means that the compound is less-accumulated.								C3:0	0.524016	0.00799201	Up
									L-threonine	0.26878	0.012654	Up
									L-Asparagine	-0.79572	0.012654	Down
									2-Hydroxycaproic acid	0.856372	0.012654	Up
									Azelaic acid	0.274664	0.012654	Up
									N-Methylnicotinamide	0.403175	0.012654	Up
									C18:3(cis-9,12,15)	0.347289	0.012654	Up
									C22:6(cis-4,7,10,13,16,19)	0.275388	0.012654	Up
									L-Lysine	0.461865	0.012654	Up
									Pyruvate	0.339478	0.012654	Up
									“up” means that the compound is over-accumulated in C group, compared with K group while “down” means that the compound is less-accumulated.
