# Supplementary material for: Integrative transcriptomics and metabolomics explore the mechanism of kaempferol on improving nonalcoholic steatohepatitis
Source: Royal Society of Chemistry journal article supplement (doi:10.1039/d0fo02123g), 2020-01-01
Supplement: d0fo02123g6.xlsx [file d0fo02123g6.xlsx]

## Sheet: Serum
		C VS M							M VS K							M VS K
	Pathway	Total	Expected	Hits	Raw p	FDR	Impact	Pathway	Total	Expected	Hits	Raw p	FDR	Impact	Pathway	Total	Expected	Hits	Raw p	FDR	Impact
Serum	Aminoacyl-tRNA biosynthesis	69	1.1687	6	0.00072	0.059011	0.12903	Alpha Linolenic Acid and Linoleic Acid Metabolism	17	0.4398	3	0.008225	0.81426	0.27381	Phenylalanine, tyrosine and tryptophan biosynthesis	4	0.033548	1	0.03316	1	0
	Biosynthesis of unsaturated fatty acids	42	0.71136	4	0.004609	0.18713	0	Citric Acid Cycle	25	0.64677	2	0.13426	1	0.13043	Biosynthesis of unsaturated fatty acids	36	0.30194	2	0.034843	1	0
	Alanine, aspartate and glutamate metabolism	24	0.40649	3	0.006846	0.18713	0	Fatty Acid Biosynthesis	33	0.85373	2	0.20881	1	0.038332	Phenylalanine metabolism	10	0.083871	1	0.081002	1	0.2619
	Starch and sucrose metabolism	19	0.32181	2	0.039453	0.77449	0.04191	Catecholamine Biosynthesis	14	0.36219	1	0.30884	1	0	Sphingolipid metabolism	21	0.17613	1	0.16308	1	0
	Ubiquinone and other terpenoid-quinone biosynthesis	3	0.050812	1	0.049991	0.77449	0	Butyrate Metabolism	16	0.41393	1	0.34465	1	0	Pentose phosphate pathway	22	0.18452	1	0.1702	1	0
	Lysine biosynthesis	4	0.067749	1	0.066115	0.77449	0	Transfer of Acetyl Groups into Mitochondria	18	0.46567	1	0.37867	1	0.065327	Alanine, aspartate and glutamate metabolism	28	0.23484	1	0.21173	1	0.08654
	Phenylalanine, tyrosine and tryptophan biosynthesis	4	0.067749	1	0.066115	0.77449	0.5	Tryptophan Metabolism	55	1.4229	2	0.42181	1	0	Glyoxylate and dicarboxylate metabolism	32	0.26839	1	0.23835	1	0.04233
	Biotin metabolism	5	0.084686	1	0.081977	0.80017	0	Tyrosine Metabolism	55	1.4229	2	0.42181	1	0.019656	Cysteine and methionine metabolism	33	0.27677	1	0.24487	1	0.02184
	Glycine, serine and threonine metabolism	31	0.52505	2	0.0949	0.80017	0.23848	Bile Acid Biosynthesis	60	1.5522	2	0.46728	1	0.00459	Glycine, serine and threonine metabolism	33	0.27677	1	0.24487	1	0.21707
	Cyanoamino acid metabolism	6	0.10162	1	0.097581	0.80017	0	Pentose Phosphate Pathway	27	0.69851	1	0.51186	1	0	Arachidonic acid metabolism	36	0.30194	1	0.26413	1	0.3135
	Methane metabolism	9	0.15243	1	0.14288	1	0.4	Nicotinate and Nicotinamide Metabolism	32	0.82786	1	0.5735	1	0.037318	Tryptophan metabolism	41	0.34387	1	0.29522	1	0
	Phenylalanine metabolism	11	0.18631	1	0.17186	1	0	Porphyrin Metabolism	36	0.93134	1	0.61736	1	0	Aminoacyl-tRNA biosynthesis	48	0.40258	1	0.33672	1	0.16667
	Selenoamino acid metabolism	15	0.25406	1	0.22703	1	0	Glutamate Metabolism	45	1.1642	1	0.70075	1	0
	Propanoate metabolism	20	0.33874	1	0.29105	1	0	Pyrimidine Metabolism	54	1.397	1	0.76651	1	0
	Sphingolipid metabolism	21	0.35568	1	0.30323	1	0	Purine Metabolism	63	1.6299	1	0.81826	1	0
	Lysine degradation	23	0.38956	1	0.32699	1	0
	Galactose metabolism	26	0.44037	1	0.36118	1	0.03644
	Cysteine and methionine metabolism	27	0.4573	1	0.37221	1	0.02533
	Arachidonic acid metabolism	36	0.60974	1	0.46353	1	0.32601
	Amino sugar and nucleotide sugar metabolism	37	0.62668	1	0.47286	1	0
	Tyrosine metabolism	44	0.74524	1	0.5339	1	0.14045

## Sheet: Liver
		C VS M							M VS K							K VS C
	Pathway	Total	Expected	Hits	Raw p	FDR	Impact	Pathway	Total	Expected	Hits	Raw p	FDR	Impact	Pathway	Total	Expected	Hits	Raw p	FDR	Impact
Liver	Glycine, serine and threonine metabolism	31	0.74382	3	0.035871	0.49024	0.50732	Phenylalanine, tyrosine and tryptophan biosynthesis	4	0.014114	1	0.014055	1	0.5	Aminoacyl-tRNA biosynthesis	48	1.3935	9	4.6402e-06	0.00038978	0.16667
	Phenylalanine, tyrosine and tryptophan biosynthesis	4	0.095977	1	0.092673	0.56071	0.5	Phenylalanine metabolism	11	0.038814	1	0.03827	1	0.40741	Alanine, aspartate and glutamate metabolism	28	0.8129	6	9.9349e-05	0.0032158	0.39664
	beta-Alanine metabolism	17	0.4079	2	0.060692	0.56071	0.44444	Biosynthesis of unsaturated fatty acids	42	0.1482	1	0.13986	1	0	Phenylalanine metabolism	10	0.29032	4	0.00011485	0.0032158	0.2619
	Phenylalanine metabolism	11	0.26394	2	0.026846	0.44028	0.40741	Aminoacyl-tRNA biosynthesis	69	0.24347	1	0.22117	1	0	Phenylalanine, tyrosine and tryptophan biosynthesis	4	0.11613	2	0.0047666	0.1001	0
	Methane metabolism	9	0.21595	2	0.018108	0.37122	0.4								Cysteine and methionine metabolism	33	0.95806	4	0.013716	0.19202	0.16809
	Valine, leucine and isoleucine biosynthesis	11	0.26394	1	0.23518	1	0.33333								Glycine, serine and threonine metabolism	33	0.95806	4	0.013716	0.19202	0.46284
	Alanine, aspartate and glutamate metabolism	24	0.57586	5	0.00018	0.007387	0.30696								Pantothenate and CoA biosynthesis	19	0.55161	3	0.016008	0.1921	0.02143
	Aminoacyl-tRNA biosynthesis	69	1.6556	9	1.8e-05	0.001478	0.12903								Valine, leucine and isoleucine biosynthesis	8	0.23226	2	0.020652	0.21685	0
	Cysteine and methionine metabolism	27	0.64785	2	0.13516	0.73887	0.11218								Neomycin, kanamycin and gentamicin biosynthesis	2	0.058065	1	0.05724	0.47673	0
	Tryptophan metabolism	40	0.95977	1	0.62666	1	0.10987								Arginine biosynthesis	14	0.40645	2	0.06011	0.47673	0.22843
	Arginine and proline metabolism	44	1.0558	3	0.085619	0.56071	0.0424								Glyoxylate and dicarboxylate metabolism	32	0.92903	3	0.063078	0.47673	0.14815
	Starch and sucrose metabolism	19	0.45589	2	0.074079	0.56071	0.04191								Butanoate metabolism	15	0.43548	2	0.068104	0.47673	0.03175
	Galactose metabolism	26	0.62385	1	0.47121	1	0.03644								beta-Alanine metabolism	21	0.60968	2	0.12218	0.78947	0.39925
	Primary bile acid biosynthesis	46	1.1037	1	0.67876	1	0.02976								Pyruvate metabolism	22	0.63871	2	0.132	0.79202	0.29082
	Butanoate metabolism	22	0.52788	2	0.09573	0.56071	0.02899								Propanoate metabolism	23	0.66774	2	0.14201	0.79523	0
	Glutathione metabolism	26	0.62385	1	0.47121	1	0.00573								Lysine degradation	25	0.72581	2	0.16247	0.85298	0
	Cyanoamino acid metabolism	6	0.14397	2	0.007894	0.21578	0								Ubiquinone and other terpenoid-quinone biosynthesis	9	0.26129	1	0.23345	1	1
	Pantothenate and CoA biosynthesis	15	0.35992	2	0.048275	0.56071	0								Biotin metabolism	10	0.29032	1	0.25583	1	0
	Biosynthesis of unsaturated fatty acids	42	1.0078	3	0.076648	0.56071	0								Biosynthesis of unsaturated fatty acids	36	1.0452	2	0.28113	1	0
	Propanoate metabolism	20	0.47989	2	0.0811	0.56071	0								Arginine and proline metabolism	38	1.1032	2	0.30302	1	0.02385
	Nitrogen metabolism	9	0.21595	1	0.19685	1	0								Tyrosine metabolism	42	1.2194	2	0.34645	1	0.08276
	Histidine metabolism	15	0.35992	1	0.30659	1	0								Nicotinate and nicotinamide metabolism	15	0.43548	1	0.35851	1	0
	Selenoamino acid metabolism	15	0.35992	1	0.30659	1	0								Histidine metabolism	16	0.46452	1	0.37732	1	0
	Pentose and glucuronate interconversions	16	0.38391	1	0.32341	1	0								Pentose and glucuronate interconversions	18	0.52258	1	0.41333	1	0.125
	Pentose phosphate pathway	19	0.45589	1	0.37152	1	0								Starch and sucrose metabolism	18	0.52258	1	0.41333	1	0.4207
	Sphingolipid metabolism	21	0.50388	1	0.40172	1	0								Selenocompound metabolism	20	0.58065	1	0.4473	1	0
	Lysine degradation	23	0.55187	1	0.43052	1	0								Citrate cycle (TCA cycle)	20	0.58065	1	0.4473	1	0.04634
	Pyruvate metabolism	23	0.55187	1	0.43052	1	0								Sphingolipid metabolism	21	0.60968	1	0.46355	1	0
	Glycolysis or Gluconeogenesis	26	0.62385	1	0.47121	1	0								Glycolysis / Gluconeogenesis	26	0.75484	1	0.53808	1	0.10044
	Porphyrin and chlorophyll metabolism	27	0.64785	1	0.48414	1	0								Galactose metabolism	27	0.78387	1	0.55171	1	0.03499
	Amino sugar and nucleotide sugar metabolism	37	0.88779	1	0.59763	1	0								Glutathione metabolism	28	0.8129	1	0.56496	1	0.08873
	Valine, leucine and isoleucine degradation	38	0.91179	1	0.60754	1	0								Porphyrin and chlorophyll metabolism	30	0.87097	1	0.59031	1	0
	Pyrimidine metabolism	41	0.98377	1	0.63588	1	0								Amino sugar and nucleotide sugar metabolism	37	1.0742	1	0.66818	1	0
															Pyrimidine metabolism	39	1.1323	1	0.68763	1	0
															Valine, leucine and isoleucine degradation	40	1.1613	1	0.69693	1	0
															Tryptophan metabolism	41	1.1903	1	0.70596	1	0.09417
															Primary bile acid biosynthesis	46	1.3355	1	0.74732	1	0.00758
